# Supplementary material for: Behavior of Tilted Angle Shear Connectors
Source: PLoS One. 2015 Dec 7;10(12):e0144288. doi: 10.1371/journal.pone.0144288 (PMC4671601; doi:10.1371/journal.pone.0144288)
Supplement: S1 File — (XLSX) [file pone.0144288.s001.xlsx]

## Sheet: MA112,5L60
WORKSHOP 3 EXPORTED DATA: [C:\Users\Maleki\2012-4-14\MA112,5L60.W01 - 1]					displacement(mm)	load(KN)							displacement(mm)	load(KN)
*************************************************************************************************				27.361	0	0							0.01	-0.002
Source of data: ToolKit				27.361	0.0158	0.653575							0.01	0
WS3 File Version: 1.04				27.361	0.0326	1.06544							0.01	0.001
Number of bytes in subfile: 8430				27.361	0.0486	1.46945							0.01	-0.005
Total number of data points: 1014				27.361	0.0599	1.78533							0.01	-0.004
Test date: 14/05/2012				27.361	0.0754	2.22861							0.01	-0.004
Test time: 21:32:09				27.361	0.092	2.72076							0.01	-0.013
Player Step: 1				27.361	0.1081	3.24519							0.01	-0.007
Step Capture No: 1				27.361	0.128	3.95112							0.01	-0.005
Actuator: 1				27.361	0.1467	4.08201							0.01	-0.005
*************************************************************************************************				27.361	0.1599	4.61254							0.01	-0.004
Actuator: 1 Channel:0	Actuator: 1 Channel:1			27.361	0.1709	5.15181							0.01	-0.001
Load Current (kN)	Stroke Current (mm)			27.361	0.1872	5.92493							0.01	-0.008
0.002	-0.01			27.361	0.2031	6.77746							0.01	-0.003
0	-0.01			27.361	0.2189	7.7155							0.005	-0.016
-0.001	-0.01	fc	27.361	27.361	0.2349	8.77832							0.0098	-0.01
0.005	-0.01			27.361	0.2499	9.89088							0.01	-0.012
0.004	-0.01			27.361	0.2613	10.7268							0.01	-0.015
0.004	-0.01			27.361	0.2774	12.0287							0.01	-0.01
0.013	-0.01			27.361	0.2949	13.3935							0.01	-0.009
0.007	-0.01			27.361	0.3117	14.6779							0.0076	-0.013
0.005	-0.01			27.361	0.328	15.9624							0.01	-0.012
0.005	-0.01			27.361	0.347	17.7224		MAX LOAD(KN)	@ DISPLACEMENT(mm)				0.0268	0.001
0.004	-0.01			27.361	0.3627	19.2835		177.252	1.9308				0.0432	0.004
0.001	-0.01			27.361	0.3784	20.9284		delta ultimate	13.0179				0.0632	0.001
0.008	-0.01			27.361	0.3899	22.1605							0.0793	0.006
0.003	-0.01			27.361	0.4058	23.8926							0.095	0.007
0.016	-0.005			27.361	0.4211	25.807							0.11	0.011
0.01	-0.0098			27.361	0.4367	27.8891							0.1263	0.011
0.012	-0.01			27.361	0.4533	30.0758							0.1428	0.016
0.015	-0.01			27.361	0.4694	32.4536							0.1549	0.023
0.01	-0.01			27.361	0.4849	34.8428							0.17	0.018
0.009	-0.01			27.361	0.5	37.2878							0.1828	0.021
0.013	-0.0076			27.361	0.5199	40.4387							0.1989	0.023
0.012	-0.01			27.361	0.5357	43.0251							0.21	0.028
-0.001	-0.0268			27.361	0.5522	45.6656							0.2263	0.048
-0.004	-0.0432			27.361	0.5684	48.3314							0.2428	0.069
-0.001	-0.0632			27.361	0.5843	51.0137							0.2588	0.087
-0.006	-0.0793			27.361	0.5999	53.7354							0.2747	0.109
-0.007	-0.095			27.361	0.6151	56.4387							0.2863	0.121
-0.011	-0.11			27.361	0.6317	59.1219							0.3024	0.147
-0.011	-0.1263			27.361	0.6517	62.4264							0.3144	0.161
-0.016	-0.1428			27.361	0.6678	65.059							0.33	0.164
-0.023	-0.1549			27.361	0.6798	67.0084							0.3456	0.166
-0.018	-0.17			27.361	0.6949	69.6166							0.3617	0.164
-0.021	-0.1828			27.361	0.7076	71.5503							0.3778	0.168
-0.023	-0.1989			27.361	0.7197	73.4674							0.39	0.168
-0.028	-0.21			27.361	0.7395	76.6349							0.4052	0.163
-0.048	-0.2263			27.361	0.7549	79.1052							0.4215	0.169
-0.069	-0.2428			27.361	0.7708	81.5214							0.4377	0.169
-0.087	-0.2588			27.361	0.7868	83.9612							0.4536	0.174
-0.109	-0.2747			27.361	0.8029	86.3897							0.4735	0.178
-0.121	-0.2863			27.361	0.8187	88.757							0.4851	0.181
-0.147	-0.3024			27.361	0.8349	91.175							0.4975	0.186
-0.161	-0.3144			27.361	0.8504	93.5319							0.5175	0.188
-0.164	-0.33			27.361	0.8702	96.414							0.5333	0.187
-0.166	-0.3456			27.361	0.8864	98.7177							0.5498	0.186
-0.164	-0.3617			27.361	0.9024	100.997							0.565	0.191
-0.168	-0.3778			27.361	0.9183	103.289							0.5809	0.182
-0.168	-0.39			27.361	0.9349	105.558							0.597	0.19
-0.163	-0.4052			27.361	0.9499	107.809							0.6129	0.192
-0.169	-0.4215			27.361	0.9659	110.044							0.6295	0.202
-0.169	-0.4377			27.361	0.9821	112.235							0.6494	0.203
-0.174	-0.4536			27.361	0.9981	114.385							0.665	0.205
-0.178	-0.4735			27.361	1.0099	116.001							0.6805	0.209
-0.181	-0.4851			27.361	1.0256	118.096							0.6966	0.206
-0.186	-0.4975			27.361	1.0455	120.175							0.7124	0.202
-0.188	-0.5175			27.361	1.0614	122.718							0.7289	0.202
-0.187	-0.5333			27.361	1.077	124.663							0.745	0.198
-0.186	-0.5498			27.361	1.0935	126.642							0.7601	0.202
-0.191	-0.565			27.361	1.1097	128.611							0.7801	0.202
-0.182	-0.5809			27.361	1.1249	130.467							0.7963	0.202
-0.19	-0.597			27.361	1.1399	131.985							0.8087	0.203
-0.192	-0.6129			27.361	1.1549	133.254							0.825	0.2
-0.202	-0.6295			27.361	1.1707	135.023							0.84	0.202
-0.203	-0.6494			27.361	1.1915	137.079							0.856	0.201	displacement(mm)	load(KN)
-0.205	-0.665			27.361	1.2037	138.196							0.8719	0.202	0	0.087
-0.209	-0.6805			27.361	1.2149	139.291							0.8885	0.201	0.0159	0.109
-0.206	-0.6966			27.361	1.2349	141.08							0.9047	0.207	0.0275	0.121
-0.202	-0.7124			27.361	1.2528	142.396							0.92	0.208	0.0436	0.147
-0.202	-0.7289			27.361	1.268	143.848							0.9359	0.214	0.0556	0.161
-0.198	-0.745			27.361	1.2826	144.983							0.9558	0.207	0.0712	0.164
-0.202	-0.7601			27.361	1.2994	146.629							0.9718	0.217	0.0868	0.166
-0.202	-0.7801			27.361	1.3166	148.198							0.9846	0.21	0.1029	0.164
-0.202	-0.7963			27.361	1.3299	149.192							1	0.21	0.119	0.168
-0.203	-0.8087			27.361	1.3465	150.429							1.0156	0.207	0.1312	0.168
-0.2	-0.825			27.361	1.3676	152.039							1.0315	0.206	0.1464	0.163
-0.202	-0.84			27.361	1.3849	153.27							1.0481	0.205	0.1627	0.169
-0.201	-0.856			27.361	1.4004	154.308							1.0644	0.204	0.1789	0.169
-0.202	-0.8719			27.361	1.4129	155.107							1.08	0.21	0.1948	0.174
-0.201	-0.8885			27.361	1.4288	156.207							1.0916	0.209	0.2147	0.178
-0.207	-0.9047			27.361	1.4447	157.327							1.1082	0.207	0.2263	0.181
-0.208	-0.92			27.361	1.4599	158.395							1.12	0.211	0.2387	0.186
-0.214	-0.9359			27.361	1.4756	159.395							1.1357	0.216	0.2587	0.188
-0.207	-0.9558			27.361	1.4922	160.371							1.1481	0.215	0.2745	0.187
-0.217	-0.9718			27.361	1.5082	161.374							1.1643	0.218	0.291	0.186
-0.21	-0.9846			27.361	1.5243	162.372							1.18	0.216	0.3062	0.191
-0.21	-1			27.361	1.5399	163.371							1.2	0.215	0.3221	0.182
-0.207	-1.0156			27.361	1.5523	164.101							1.2153	0.213	0.3382	0.19
-0.206	-1.0315			27.361	1.5686	165.059							1.2277	0.216	0.3541	0.192
-0.205	-1.0481			27.361	1.5888	166.152							1.2439	0.219	0.3707	0.202
-0.204	-1.0644			27.361	1.6049	167.047							1.2552	0.217	0.3906	0.203
-0.21	-1.08			27.361	1.6207	167.896							1.2711	0.223	0.4062	0.205
-0.209	-1.0916			27.361	1.6372	168.743							1.284	0.227	0.4217	0.209
-0.207	-1.1082			27.361	1.6549	169.627							1.2952	0.218	0.4378	0.206
-0.211	-1.12			27.361	1.6706	170.288							1.3111	0.223	0.4536	0.202
-0.216	-1.1357			27.361	1.6873	170.895							1.3239	0.229	0.4701	0.202
-0.215	-1.1481			27.361	1.7036	171.544							1.34	0.226	0.4862	0.198
-0.218	-1.1643			27.361	1.7149	172.008							1.351	0.226	0.5013	0.202
-0.216	-1.18			27.361	1.7277	172.417							1.3676	0.229	0.5213	0.202
-0.215	-1.2			27.361	1.7434	172.952							1.38	0.227	0.5375	0.202
-0.213	-1.2153			27.361	1.7549	173.354							1.3951	0.228	0.5499	0.203
-0.216	-1.2277			27.361	1.7712	173.918							1.4076	0.228	0.5662	0.2
-0.219	-1.2439			27.361	1.7875	174.422							1.42	0.226	0.5812	0.202
-0.217	-1.2552			27.361	1.8038	174.915							1.435	0.229	0.5972	0.201
-0.223	-1.2711			27.361	1.8199	175.338							1.4477	0.228	0.6131	0.202
-0.227	-1.284			27.361	1.8352	175.62							1.4639	0.23	0.6297	0.201
-0.218	-1.2952			27.361	1.8478	175.879							1.4751	0.226	0.6459	0.207
-0.223	-1.3111			27.361	1.8638	176.223							1.491	0.232	0.6612	0.208
-0.229	-1.3239			27.361	1.8798	176.507							1.5039	0.231	0.6771	0.214
-0.226	-1.34			27.361	1.8994	176.83							1.52	0.231	0.697	0.207
-0.226	-1.351			27.361	1.9149	177.099							1.531	0.236	0.713	0.217
-0.229	-1.3676			27.361	1.9308	177.252							1.5477	0.243	0.7258	0.21
-0.227	-1.38			27.361	1.9458	177.006							1.564	0.247	0.7412	0.21
-0.228	-1.3951			27.361	1.9599	175.932							1.58	0.246	0.7568	0.207
-0.228	-1.4076			27.361	1.971	175.127							1.5951	0.243	0.7727	0.206
-0.226	-1.42			27.361	1.9871	173.954							1.6151	0.238	0.7893	0.205
-0.229	-1.435			27.361	2.0025	172.92							1.6311	0.246	0.8056	0.204
-0.228	-1.4477			27.361	2.0193	172.568							1.6477	0.247	0.8212	0.21
-0.23	-1.4639			27.361	2.0317	172.208							1.6639	0.251	0.8328	0.209
-0.226	-1.4751			27.361	2.0489	171.856							1.68	0.252	0.8494	0.207
-0.232	-1.491			27.361	2.0649	170.028							1.6911	0.247	0.8612	0.211
-0.231	-1.5039			27.361	2.0749	167.006							1.7076	0.25	0.8769	0.216
-0.231	-1.52			27.361	2.0899	166.915							1.7238	0.249	0.8893	0.215
-0.236	-1.531			27.361	2.1073	166.663							1.74	0.248	0.9055	0.218
-0.243	-1.5477			27.361	2.1241	166.615							1.7511	0.254	0.9212	0.216
-0.247	-1.564			27.361	2.1409	166.554							1.7677	0.269	0.9412	0.215
-0.246	-1.58			27.361	2.1542	166.546							1.7839	0.368	0.9565	0.213
-0.243	-1.5951			27.361	2.1701	166.416							1.7951	0.465	0.9689	0.216
-0.238	-1.6151			27.361	2.1872	166.411							1.8109	0.749	0.9851	0.219
-0.246	-1.6311			27.361	2.2074	166.429							1.8277	1.221	0.9964	0.217
-0.247	-1.6477			27.361	2.2241	166.427							1.8437	1.684	1.0123	0.223
-0.251	-1.6639			27.361	2.2399	166.422							1.855	2.046	1.0252	0.227
-0.252	-1.68			27.361	2.2518	166.315							1.8705	2.554	1.0364	0.218
-0.247	-1.6911			27.361	2.2683	166.25							1.8871	3.118	1.0523	0.223
-0.25	-1.7076			27.361	2.2843	166.293							1.9032	3.719	1.0651	0.229
-0.249	-1.7238			27.361	2.3001	166.44							1.9231	4.528	1.0812	0.226
-0.248	-1.74			27.361	2.3164	166.49							1.9418	4.678	1.0922	0.226
-0.254	-1.7511			27.361	2.3332	166.511							1.955	5.286	1.1088	0.229
-0.269	-1.7677			27.361	2.3449	166.556							1.966	5.904	1.1212	0.227
-0.368	-1.7839			27.361	2.3602	166.536							1.9823	6.79	1.1363	0.228
-0.465	-1.7951			27.361	2.3758	166.454							1.9982	7.767	1.1488	0.228
-0.749	-1.8109			27.361	2.3922	166.573							2.014	8.842	1.1612	0.226
-1.221	-1.8277			27.361	2.4091	166.68							2.03	10.06	1.1762	0.229
-1.684	-1.8437			27.361	2.4293	166.51							2.045	11.335	1.1889	0.228
-2.046	-1.855			27.361	2.4449	166.198							2.0564	12.293	1.2051	0.23
-2.554	-1.8705			27.361	2.4605	165.949							2.0725	13.785	1.2163	0.226
-3.118	-1.8871			27.361	2.4735	165.748							2.09	15.349	1.2322	0.232
-3.719	-1.9032			27.361	2.4899	165.538							2.1068	16.821	1.2451	0.231
-4.528	-1.9231			27.361	2.505	165.361							2.1231	18.293	1.2612	0.231
-4.678	-1.9418			27.361	2.5212	165.134							2.1421	20.31	1.2722	0.236
-5.286	-1.955			27.361	2.5375	164.874							2.1578	22.099	1.2889	0.243
-5.904	-1.966			27.361	2.5543	164.662							2.1735	23.984	1.3052	0.247
-6.79	-1.9823			27.361	2.5699	164.393							2.185	25.396	1.3212	0.246
-7.767	-1.9982			27.361	2.5857	164.022							2.2009	27.381	1.3363	0.243
-8.842	-2.014			27.361	2.6056	163.602							2.2162	29.575	1.3563	0.238
-10.06	-2.03			27.361	2.6216	163.361							2.2318	31.961	1.3723	0.246
-11.335	-2.045			27.361	2.6342	163.117							2.2484	34.467	1.3889	0.247
-12.293	-2.0564			27.361	2.6499	162.733							2.2645	37.192	1.4051	0.251
-13.785	-2.0725			27.361	2.6613	162.621							2.28	39.93	1.4212	0.252
-15.349	-2.09			27.361	2.6742	162.494							2.2951	42.732	1.4323	0.247
-16.821	-2.1068			27.361	2.6899	162.049							2.315	46.343	1.4488	0.25
-18.293	-2.1231			27.361	2.7018	161.899							2.3308	49.307	1.465	0.249
-20.31	-2.1421			27.361	2.7177	161.724							2.3473	52.333	1.4812	0.248
-22.099	-2.1578			27.361	2.7377	161.409							2.3635	55.388	1.4923	0.254
-23.984	-2.1735			27.361	2.7538	161.225							2.3794	58.462	1.5089	0.269
-25.396	-2.185			27.361	2.765	161.206							2.395	61.581	1.5251	0.368
-27.381	-2.2009			27.361	2.7813	161.133							2.4102	64.679	1.5363	0.465
-29.575	-2.2162			27.361	2.7941	161.036							2.4268	67.754	1.5521	0.749
-31.961	-2.2318			27.361	2.8054	160.907							2.4468	71.541	1.5689	1.221
-34.467	-2.2484			27.361	2.8255	160.682							2.4629	74.558	1.5849	1.684
-37.192	-2.2645			27.361	2.8418	160.532							2.4749	76.792	1.5962	2.046
-39.93	-2.28			27.361	2.858	160.365							2.49	79.781	1.6117	2.554
-42.732	-2.2951			27.361	2.8699	160.179							2.5027	81.997	1.6283	3.118
-46.343	-2.315			27.361	2.885	159.887							2.5148	84.194	1.6444	3.719
-49.307	-2.3308			27.361	2.9015	159.74							2.5346	87.824	1.6643	4.528
-52.333	-2.3473			27.361	2.9174	159.377							2.55	90.655	1.683	4.678
-55.388	-2.3635			27.361	2.9339	159.107							2.5659	93.424	1.6962	5.286
-58.462	-2.3794			27.361	2.9499	158.897							2.5819	96.22	1.7072	5.904
-61.581	-2.395			27.361	2.961	158.749							2.598	99.003	1.7235	6.79
-64.679	-2.4102			27.361	2.9772	158.534							2.6138	101.716	1.7394	7.767
-67.754	-2.4268			27.361	2.9942	158.235							2.63	104.487	1.7552	8.842
-71.541	-2.4468			27.361	3.0099	157.942							2.6455	107.188	1.7712	10.06
-74.558	-2.4629			27.361	3.0254	157.682							2.6653	110.491	1.7862	11.335
-76.792	-2.4749			27.361	3.0499	157.172							2.6815	113.131	1.7976	12.293
-79.781	-2.49			27.361	3.0617	156.909							2.6975	115.743	1.8137	13.785
-81.997	-2.5027			27.361	3.0776	156.586							2.7134	118.37	1.8312	15.349
-84.194	-2.5148			27.361	3.0899	156.356							2.73	120.97	1.848	16.821
-87.824	-2.5346			27.361	3.1056	156.058							2.745	123.55	1.8643	18.293
-90.655	-2.55			27.361	3.118	155.881							2.761	126.111	1.8833	20.31
-93.424	-2.5659			27.361	3.2479	135.104							2.7772	128.622	1.899	22.099
-96.22	-2.5819			27.361	3.2013	115.356							2.7932	131.086	1.9147	23.984
-99.003	-2.598			27.361	3.1799	109.078							2.805	132.938	1.9262	25.396
-101.716	-2.6138			27.361	3.1817	110.276							2.8207	135.339	1.9421	27.381
-104.487	-2.63			27.361	3.1927	113.722							2.8406	137.721	1.9574	29.575
-107.188	-2.6455			27.361	3.2087	118.188							2.8565	140.635	1.973	31.961
-110.491	-2.6653			27.361	3.2149	121.228							2.8721	142.865	1.9896	34.467
-113.131	-2.6815			27.361	3.2336	125.838							2.8886	145.132	2.0057	37.192
-115.743	-2.6975			27.361	3.2476	129.237							2.9048	147.389	2.0212	39.93
-118.37	-2.7134			27.361	3.2674	131.286							2.92	149.516	2.0363	42.732
-120.97	-2.73			27.361	3.2745	132.869							2.935	151.255	2.0562	46.343
-123.55	-2.745			27.361	3.2935	134.155							2.95	152.71	2.072	49.307
-126.111	-2.761			27.361	3.3078	135.533							2.9658	154.737	2.0885	52.333
-128.622	-2.7772			27.361	3.3208	136.047							2.9866	157.093	2.1047	55.388
-131.086	-2.7932			27.361	3.3625	133.816							2.9988	158.373	2.1206	58.462
-132.938	-2.805			27.361	3.3649	129.398							3.01	159.628	2.1362	61.581
-135.339	-2.8207			27.361	3.3699	130.452							3.03	161.678	2.1514	64.679
-137.721	-2.8406			27.361	3.3849	132.269							3.0479	163.186	2.168	67.754
-140.635	-2.8565			27.361	3.3955	133.455							3.0631	164.85	2.188	71.541
-142.865	-2.8721			27.361	3.4349	130.079							3.0777	166.151	2.2041	74.558
-145.132	-2.8886			27.361	3.44	127.146							3.0945	168.038	2.2161	76.792
-147.389	-2.9048			27.361	3.4509	128.825							3.1117	169.836	2.2312	79.781
-149.516	-2.92			27.361	3.4673	130.226							3.125	170.975	2.2439	81.997
-151.255	-2.935			27.361	3.5114	126.598							3.1416	172.392	2.256	84.194
-152.71	-2.95			27.361	3.5149	123.063							3.1627	174.238	2.2758	87.824
-154.737	-2.9658			27.361	3.5149	122.238							3.18	175.648	2.2912	90.655
-157.093	-2.9866			27.361	3.5249	124.773							3.1955	176.838	2.3071	93.424
-158.373	-2.9988			27.361	3.54	126.578							3.208	177.753	2.3231	96.22
-159.628	-3.01			27.361	3.5799	122.68							3.2239	179.014	2.3392	99.003
-161.678	-3.03			27.361	3.583	120.343							3.2398	180.297	2.355	101.716
-163.186	-3.0479			27.361	3.5899	120.818							3.255	181.521	2.3712	104.487
-164.85	-3.0631			27.361	3.6028	122.741							3.2707	182.667	2.3867	107.188
-166.151	-3.0777			27.361	3.6291	122.91							3.2873	183.786	2.4065	110.491
-168.038	-3.0945			27.361	3.6499	117.668							3.3033	184.936	2.4227	113.131
-169.836	-3.1117			27.361	3.6556	118.41							3.3194	186.079	2.4387	115.743
-170.975	-3.125			27.361	3.6709	119.93							3.335	187.224	2.4546	118.37
-172.392	-3.1416			27.361	3.7049	117.687							3.3474	188.061	2.4712	120.97
-174.238	-3.1627			27.361	3.7099	115.266							3.3637	189.158	2.4862	123.55
-175.648	-3.18			27.361	3.7177	116.15							3.3839	190.411	2.5022	126.111
-176.838	-3.1955			27.361	3.7316	117.597							3.4	191.437	2.5184	128.622
-177.753	-3.208			27.361	3.7633	115.9							3.4158	192.41	2.5344	131.086
-179.014	-3.2239			27.361	3.7699	113.697							3.4323	193.38	2.5462	132.938
-180.297	-3.2398			27.361	3.7811	114.751							3.45	194.394	2.5619	135.339
-181.521	-3.255			27.361	3.7978	115.707							3.4657	195.151	2.5818	137.721
-182.667	-3.2707			27.361	3.8249	112.736							3.4824	195.846	2.5977	140.635
-183.786	-3.2873			27.361	3.8349	111.831							3.4987	196.59	2.6133	142.865
-184.936	-3.3033			27.361	3.8499	113.392							3.51	197.122	2.6298	145.132
-186.079	-3.3194			27.361	3.8743	112.622							3.5228	197.591	2.646	147.389
-187.224	-3.335			27.361	3.886	110.278							3.5385	198.204	2.6612	149.516
-188.061	-3.3474			27.361	3.8949	110.111							3.55	198.665	2.6762	151.255
-189.158	-3.3637			27.361	3.9062	111.053							3.5663	199.311	2.6912	152.71
-190.411	-3.3839			27.361	3.928	110.956							3.5826	199.888	2.707	154.737
-191.437	-3.4			27.361	3.9414	108.89							3.5989	200.453	2.7278	157.093
-192.41	-3.4158			27.361	3.9499	108.482							3.615	200.938	2.74	158.373
-193.38	-3.4323			27.361	3.9629	109.444							3.6303	201.261	2.7512	159.628
-194.394	-3.45			27.361	3.9887	108.54							3.6429	201.558	2.7712	161.678
-195.151	-3.4657			27.361	4.0035	107.352							3.6589	201.953	2.7891	163.186
-195.846	-3.4824			27.361	4.0118	107.634							3.6749	202.278	2.8043	164.85
-196.59	-3.4987			27.361	4.0349	107.497							3.6945	202.648	2.8189	166.151
-197.122	-3.51			27.361	4.0528	106.331							3.71	202.956	2.8357	168.038
-197.591	-3.5228			27.361	4.0649	106.073							3.7259	203.132	2.8529	169.836
-198.204	-3.5385			27.361	4.082	106.27							3.7409	202.85	2.8662	170.975
-198.665	-3.55			27.361	4.0998	105.698							3.755	201.619	2.8828	172.392
-199.311	-3.5663			27.361	4.1115	105.115							3.7661	200.696	2.9039	174.238
-199.888	-3.5826			27.361	4.1253	104.971							3.7822	199.352	2.9212	175.648
-200.453	-3.5989			27.361	4.1417	104.644							3.7976	198.167	2.9367	176.838
-200.938	-3.615			27.361	4.1618	104.114							3.8144	197.764	2.9492	177.753
-201.261	-3.6303			27.361	4.1767	103.826							3.8268	197.351	2.9651	179.014
-201.558	-3.6429			27.361	4.1936	103.605							3.844	196.948	2.981	180.297
-201.953	-3.6589			27.361	4.2099	103.336							3.86	194.853	2.9962	181.521
-202.278	-3.6749			27.361	4.2254	102.68							3.87	191.39	3.0119	182.667
-202.648	-3.6945			27.361	4.24	102.515							3.885	191.286	3.0285	183.786
-202.956	-3.71			27.361	4.2525	102.523							3.9024	190.997	3.0445	184.936
-203.132	-3.7259			27.361	4.2698	102.205							3.9192	190.942	3.0606	186.079
-202.85	-3.7409			27.361	4.2849	101.792							3.936	190.872	3.0762	187.224
-201.619	-3.755			27.361	4.3001	101.589							3.9493	190.863	3.0886	188.061
-200.696	-3.7661			27.361	4.3165	101.43							3.9652	190.714	3.1049	189.158
-199.352	-3.7822			27.361	4.337	100.946							3.9823	190.708	3.1251	190.411
-198.167	-3.7976			27.361	4.3535	100.616							4.0025	190.729	3.1412	191.437
-197.764	-3.8144			27.361	4.3694	100.377							4.0192	190.726	3.157	192.41
-197.351	-3.8268			27.361	4.3853	99.9289							4.035	190.72	3.1735	193.38
-196.948	-3.844			27.361	4.4008	99.51							4.0469	190.598	3.1912	194.394
-194.853	-3.86			27.361	4.413	99.3495							4.0634	190.523	3.2069	195.151
-191.39	-3.87			27.361	4.4295	99.1034							4.0794	190.573	3.2236	195.846
-191.286	-3.885			27.361	4.445	98.6802							4.0952	190.741	3.2399	196.59
-190.997	-3.9024			27.361	4.4603	98.4664							4.1115	190.798	3.2512	197.122
-190.942	-3.9192			27.361	4.4764	98.3303							4.1283	190.822	3.264	197.591
-190.872	-3.936			27.361	4.4937	98.0013							4.14	190.874	3.2797	198.204
-190.863	-3.9493			27.361	4.5133	97.6156							4.1553	190.851	3.2912	198.665
-190.714	-3.9652			27.361	4.5295	97.3556							4.1709	190.757	3.3075	199.311
-190.708	-3.9823			27.361	4.5449	97.0589							4.1873	190.893	3.3238	199.888
-190.729	-4.0025			27.361	4.5605	96.8512							4.2042	191.016	3.3401	200.453
-190.726	-4.0192			27.361	4.573	96.7186							4.2244	190.821	3.3562	200.938
-190.72	-4.035			27.361	4.5893	96.5275							4.24	190.464	3.3715	201.261
-190.598	-4.0469			27.361	4.6049	96.2535							4.2556	190.178	3.3841	201.558
-190.523	-4.0634			27.361	4.6201	96.147							4.2686	189.948	3.4001	201.953
-190.573	-4.0794			27.361	4.6367	95.8146							4.285	189.707	3.4161	202.278
-190.741	-4.0952			27.361	4.6549	95.1121							4.3001	189.504	3.4357	202.648
-190.798	-4.1115			27.361	4.6692	94.9437							4.3163	189.245	3.4512	202.956
-190.822	-4.1283			27.361	4.6892	94.839							4.3326	188.947	3.4671	203.132
-190.874	-4.14			27.361	4.7051	94.38							4.3494	188.704	3.4821	202.85
-190.851	-4.1553			27.361	4.7205	94.099							4.365	188.395	3.4962	201.619
-190.757	-4.1709			27.361	4.7329	94.0196							4.3808	187.97	3.5073	200.696
-190.893	-4.1873			27.361	4.7492	93.9106							4.4007	187.489	3.5234	199.352
-191.016	-4.2042			27.361	4.7649	93.7526							4.4167	187.212	3.5388	198.167
-190.821	-4.2244			27.361	4.7805	93.5205							4.4293	186.933	3.5556	197.764
-190.464	-4.24			27.361	4.7964	93.3443							4.445	186.493	3.568	197.351
-190.178	-4.2556			27.361	4.8129	93.2509							4.4564	186.365	3.5852	196.948
-189.948	-4.2686			27.361	4.8293	93.0956							4.4693	186.219	3.6012	194.853
-189.707	-4.285			27.361	4.8449	92.7884							4.485	185.709	3.6112	191.39
-189.504	-4.3001			27.361	4.8649	92.5703							4.4969	185.537	3.6262	191.286
-189.245	-4.3163			27.361	4.8804	92.4472							4.5128	185.337	3.6436	190.997
-188.947	-4.3326			27.361	4.8932	92.3198							4.5328	184.975	3.6604	190.942
-188.704	-4.3494			27.361	4.9095	92.1505							4.5489	184.765	3.6772	190.872
-188.395	-4.365			27.361	4.9249	92.0292							4.5601	184.743	3.6905	190.863
-187.97	-4.3808			27.361	4.9405	91.9141							4.5764	184.659	3.7064	190.714
-187.489	-4.4007			27.361	4.9567	91.7203							4.5892	184.548	3.7235	190.708
-187.212	-4.4167			27.361	4.9735	91.5502							4.6005	184.4	3.7437	190.729
-186.933	-4.4293			27.361	4.9895	91.4219							4.6206	184.142	3.7604	190.726
-186.493	-4.445			27.361	5.0049	91.2875							4.6369	183.971	3.7762	190.72
-186.365	-4.4564			27.361	5.0207	91.1488							4.6531	183.779	3.7881	190.598
-186.219	-4.4693			27.361	5.0407	90.969							4.665	183.566	3.8046	190.523
-185.709	-4.485			27.361	5.0534	90.8626							4.6801	183.231	3.8206	190.573
-185.537	-4.4969			27.361	5.0649	90.7884							4.6966	183.063	3.8364	190.741
-185.337	-4.5128			27.361	5.0849	90.675							4.7125	182.647	3.8527	190.798
-184.975	-4.5328			27.361	5.1006	90.5607							4.729	182.337	3.8695	190.822
-184.765	-4.5489			27.361	5.1134	90.4804							4.745	182.097	3.8812	190.874
-184.743	-4.5601			27.361	5.1297	90.3652							4.7561	181.927	3.8965	190.851
-184.659	-4.5764			27.361	5.1449	90.2683							4.7723	181.681	3.9121	190.757
-184.548	-4.5892			27.361	5.1566	90.2273							4.7893	181.338	3.9285	190.893
-184.4	-4.6005			27.361	5.1735	90.1409							4.805	181.002	3.9454	191.016
-184.142	-4.6206			27.361	5.1895	90.1122							4.8205	180.704	3.9656	190.821
-183.971	-4.6369			27.361	5.2049	90.0991							4.845	180.12	3.9812	190.464
-183.779	-4.6531			27.361	5.2216	89.7945							4.8568	179.818	3.9968	190.178
-183.566	-4.665			27.361	5.2371	89.5615							4.8727	179.448	4.0098	189.948
-183.231	-4.6801			27.361	5.2529	89.5764							4.885	179.185	4.0262	189.707
-183.063	-4.6966			27.361	5.2649	89.5668							4.9007	178.843	4.0413	189.504
-182.647	-4.7125			27.361	5.2811	89.3434							4.9131	178.64	4.0575	189.245
-182.337	-4.729			27.361	5.2968	89.1924							5.043	154.83	4.0738	188.947
-182.097	-4.745			27.361	5.3133	89.1052							4.9964	132.199	4.0906	188.704
-181.927	-4.7561			27.361	5.3299	88.915							4.975	125.004	4.1062	188.395
-181.681	-4.7723			27.361	5.3497	88.7893							4.9768	126.377	4.122	187.97
-181.338	-4.7893			27.361	5.3649	88.7474							4.9878	130.326	4.1419	187.489
-181.002	-4.805			27.361	5.3812	88.5746							5.0038	135.444	4.1579	187.212
-180.704	-4.8205			27.361	5.3974	88.3425							5.01	138.928	4.1705	186.933
-180.12	-4.845			27.361	5.4139	88.1375							5.0287	144.211	4.1862	186.493
-179.818	-4.8568			27.361	5.4249	88.0886							5.0427	148.106	4.1976	186.365
-179.448	-4.8727			27.361	5.4409	87.9848							5.0625	150.455	4.2105	186.219
-179.185	-4.885			27.361	5.4571	87.867							5.0696	152.268	4.2262	185.709
-178.843	-4.9007			27.361	5.4736	87.7858							5.0886	153.742	4.2381	185.537
-178.64	-4.9131			27.361	5.4898	87.6924							5.1029	155.321	4.254	185.337
-154.83	-5.043			27.361	5.505	87.5598							5.1159	155.911	4.274	184.975
-132.199	-4.9964			27.361	5.5249	87.3984							5.1576	153.354	4.2901	184.765
-125.004	-4.975			27.361	5.5412	87.271							5.16	148.291	4.3013	184.743
-126.377	-4.9768			27.361	5.557	87.1436							5.165	149.499	4.3176	184.659
-130.326	-4.9878			27.361	5.5736	87.1026							5.18	151.581	4.3304	184.548
-135.444	-5.0038			27.361	5.5849	87.0738							5.1906	152.94	4.3417	184.4
-138.928	-5.01			27.361	5.6012	86.956							5.23	149.071	4.3618	184.142
-144.211	-5.0287			27.361	5.6175	86.812							5.2351	145.71	4.3781	183.971
-148.106	-5.0427			27.361	5.6336	86.7212							5.246	147.634	4.3943	183.779
-150.455	-5.0625			27.361	5.6497	86.6584							5.2624	149.24	4.4062	183.566
-152.268	-5.0696			27.361	5.6651	86.5668							5.3065	145.082	4.4213	183.231
-153.742	-5.0886			27.361	5.6899	86.3286							5.31	141.031	4.4378	183.063
-155.321	-5.1029			27.361	5.705	86.2404							5.31	140.085	4.4537	182.647
-155.911	-5.1159			27.361	5.721	86.1916							5.32	142.991	4.4702	182.337
-153.354	-5.1576			27.361	5.7369	86.1759							5.3351	145.059	4.4862	182.097
-148.291	-5.16			27.361	5.7496	86.1907							5.375	140.592	4.4973	181.927
-149.499	-5.165			27.361	5.7649	86.1942							5.3781	137.914	4.5135	181.681
-151.581	-5.18			27.361	5.7812	86.1593							5.385	138.458	4.5305	181.338
-152.94	-5.1906			27.361	5.8054	85.9822							5.3979	140.662	4.5462	181.002
-149.071	-5.23			27.361	5.8172	85.9446							5.4242	140.856	4.5617	180.704
-145.71	-5.2351			27.361	5.8336	85.9097							5.445	134.848	4.5862	180.12
-147.634	-5.246			27.361	5.8453	85.8574							5.4507	135.699	4.598	179.818
-149.24	-5.2624			27.361	5.8574	85.805							5.466	137.44	4.6139	179.448
-145.082	-5.3065			27.361	5.8738	85.7474							5.5	134.87	4.6262	179.185
-141.031	-5.31			27.361	5.885	85.7282							5.505	132.095	4.6419	178.843
-140.085	-5.31			27.361	5.9009	85.7117							5.5128	133.109	4.6543	178.64
-142.991	-5.32			27.361	5.9136	85.7256							5.5267	134.767	4.7842	154.83
-145.059	-5.3351			27.361	5.9299	85.7378							5.5584	132.822	4.7376	132.199
-140.592	-5.375			27.361	5.9411	85.7134							5.565	130.297	4.7162	125.004
-137.914	-5.3781			27.361	5.9539	85.6898							5.5762	131.505	4.718	126.377
-138.458	-5.385			27.361	5.9699	85.6366							5.5929	132.601	4.729	130.326
-140.662	-5.3979			27.361	5.9814	85.5685							5.62	129.196	4.745	135.444
-140.856	-5.4242			27.361	5.9975	85.4996							5.63	128.159	4.7512	138.928
-134.848	-5.445			27.361	6.0099	85.4699							5.645	129.948	4.7699	144.211
-135.699	-5.4507			27.361	6.025	85.4525							5.6694	129.065	4.7839	148.106
-137.44	-5.466			27.361	6.0371	85.4368							5.6811	126.379	4.8037	150.455
-134.87	-5.5			27.361	6.0537	85.4123							5.69	126.188	4.8108	152.268
-132.095	-5.505			27.361	6.0649	85.3862							5.7013	127.267	4.8298	153.742
-133.109	-5.5128			27.361	6.0771	85.3757							5.7231	127.156	4.8441	155.321
-134.767	-5.5267			27.361	6.0936	85.346							5.7365	124.789	4.8571	155.911
-132.822	-5.5584			27.361	6.1049	85.3059							5.745	124.321	4.8988	153.354
-130.297	-5.565			27.361	6.121	85.2439							5.758	125.423	4.9012	148.291
-131.505	-5.5762			27.361	6.1337	85.209							5.7838	124.387	4.9062	149.499
-132.601	-5.5929			27.361	6.1497	85.1916							5.7986	123.026	4.9212	151.581
-129.196	-5.62			27.361	6.1608	85.1637							5.8069	123.349	4.9318	152.94
-128.159	-5.63			27.361	6.1736	85.1157							5.83	123.192	4.9712	149.071
-129.948	-5.645			27.361	6.1899	85.0694							5.8479	121.856	4.9763	145.71
-129.065	-5.6694			27.361	6.2011	85.0589							5.86	121.56	4.9872	147.634
-126.379	-5.6811			27.361	6.217	85.0572							5.8771	121.786	5.0036	149.24
-126.188	-5.69			27.361	6.2449	85.0206							5.8949	121.13	5.0477	145.082
-127.267	-5.7013			27.361	6.2612	84.9647							5.9066	120.462	5.0512	141.031
-127.156	-5.7231			27.361	6.2774	84.9028							5.9204	120.297	5.0512	140.085
-124.789	-5.7365			27.361	6.2942	84.8129							5.9368	119.922	5.0612	142.991
-124.321	-5.745			27.361	6.3099	84.7378							5.9569	119.315	5.0763	145.059
-125.423	-5.758			27.361	6.3255	84.6689							5.9718	118.985	5.1162	140.592
-124.387	-5.7838			27.361	6.3412	84.6462							5.9887	118.732	5.1193	137.914
-123.026	-5.7986			27.361	6.3568	84.6593							6.005	118.424	5.1262	138.458
-123.349	-5.8069			27.361	6.3693	84.6968							6.0205	117.672	5.1391	140.662
-123.192	-5.83			27.361	6.3849	84.7108							6.0351	117.483	5.1654	140.856
-121.856	-5.8479			27.361	6.4053	84.6418							6.0476	117.492	5.1862	134.848
-121.56	-5.86			27.361	6.4216	84.4926							6.0649	117.127	5.1919	135.699
-121.786	-5.8771			27.361	6.4375	84.3556							6.08	116.654	5.2072	137.44
-121.13	-5.8949			27.361	6.4536	84.3399							6.0952	116.421	5.2412	134.87
-120.462	-5.9066			27.361	6.4693	84.36							6.1116	116.239	5.2462	132.095
-120.297	-5.9204			27.361	6.4853	84.3364							6.1321	115.685	5.254	133.109
-119.922	-5.9368			27.361	6.5015	84.2893							6.1486	115.307	5.2679	134.767
-119.315	-5.9569			27.361	6.5141	84.2474							6.1645	115.033	5.2996	132.822
-118.985	-5.9718			27.361	6.5299	84.1148							6.1804	114.519	5.3062	130.297
-118.732	-5.9887			27.361	6.5414	84.0563							6.1959	114.039	5.3174	131.505
-118.424	-6.005			27.361	6.5573	83.9708							6.2081	113.855	5.3341	132.601
-117.672	-6.0205			27.361	6.5699	83.8984							6.2246	113.573	5.3612	129.196
-117.483	-6.0351			27.361	6.5852	83.778							6.2401	113.088	5.3712	128.159
-117.492	-6.0476			27.361	6.6015	83.627							6.2554	112.843	5.3862	129.948
-117.127	-6.0649			27.361	6.6178	83.4874							6.2715	112.687	5.4106	129.065
-116.654	-6.08			27.361	6.6344	83.3914							6.2888	112.31	5.4223	126.379
-116.421	-6.0952			27.361	6.6454	83.3059							6.3084	111.868	5.4312	126.188
-116.239	-6.1116			27.361	6.6614	83.2413							6.3246	111.57	5.4425	127.267
-115.685	-6.1321			27.361	6.6739	83.196							6.34	111.23	5.4643	127.156
-115.307	-6.1486			27.361	6.6899	83.1183							6.3556	110.992	5.4777	124.789
-115.033	-6.1645			27.361	6.705	83.011							6.3681	110.84	5.4862	124.321
-114.519	-6.1804			27.361	6.7218	82.7789							6.3844	110.621	5.4992	125.423
-114.039	-6.1959			27.361	6.7384	82.5223							6.4	110.307	5.525	124.387
-113.855	-6.2081			27.361	6.7548	82.2989							6.4152	110.185	5.5398	123.026
-113.573	-6.2246			27.361	6.7651	82.1628							6.4318	109.804	5.5481	123.349
-113.088	-6.2401			27.361	6.7807	82.0005							6.45	108.999	5.5712	123.192
-112.843	-6.2554			27.361	6.7974	81.7457							6.4643	108.806	5.5891	121.856
-112.687	-6.2715			27.361	6.8181	81.2143							6.4843	108.686	5.6012	121.56
-112.31	-6.2888			27.361	6.838	80.6							6.5002	108.16	5.6183	121.786
-111.868	-6.3084			27.361	6.8499	80.3068							6.5156	107.838	5.6361	121.13
-111.57	-6.3246			27.361	6.865	80.004							6.528	107.747	5.6478	120.462
-111.23	-6.34			27.361	6.8771	79.8138							6.5443	107.622	5.6616	120.297
-110.992	-6.3556			27.361	6.8937	79.6017							6.56	107.441	5.678	119.922
-110.84	-6.3681			27.361	6.905	79.4386							6.5756	107.175	5.6981	119.315
-110.621	-6.3844			27.361	6.9212	79.2693							6.5915	106.973	5.713	118.985
-110.307	-6.4			27.361	6.9339	79.1288							6.608	106.866	5.7299	118.732
-110.185	-6.4152			27.361	6.9499	78.8731							6.6244	106.688	5.7462	118.424
-109.804	-6.4318			27.361	6.9619	78.6803							6.64	106.336	5.7617	117.672
-108.999	-6.45			27.361	6.978	78.4272							6.66	106.086	5.7763	117.483
-108.806	-6.4643			27.361	6.9899	78.2239							6.6755	105.945	5.7888	117.492
-108.686	-6.4843			27.361	7.0018	78.0092							6.6883	105.799	5.8061	117.127
-108.16	-6.5002			27.361	7.018	77.6375							6.7046	105.605	5.8212	116.654
-107.838	-6.5156			27.361	7.0301	77.3208							6.72	105.466	5.8364	116.421
-107.747	-6.528			27.361	7.0458	76.9639							6.7356	105.334	5.8528	116.239
-107.622	-6.5443			27.361	7.0575	76.7449							6.7518	105.112	5.8733	115.685
-107.441	-6.56			27.361	7.0699	76.5415							6.7686	104.917	5.8898	115.307
-107.175	-6.5756			27.361	7.0856	76.2815							6.7846	104.77	5.9057	115.033
-106.973	-6.5915			27.361	7.0978	76.0991							6.8	104.616	5.9216	114.519
-106.866	-6.608			27.361	7.1145	75.7832							6.8158	104.457	5.9371	114.039
-106.688	-6.6244			27.361	7.1259	75.4935							6.8358	104.251	5.9493	113.855
-106.336	-6.64			27.361	7.1423	75.0572							6.8485	104.129	5.9658	113.573
-106.086	-6.66			27.361	7.1549	74.7004							6.86	104.044	5.9813	113.088
-105.945	-6.6755			27.361	7.1699	74.3609							6.88	103.914	5.9966	112.843
-105.799	-6.6883			27.361	7.1812	74.2265							6.8957	103.783	6.0127	112.687
-105.605	-6.7046			27.361	7.1939	74.1079							6.9085	103.691	6.03	112.31
-105.466	-6.72			27.361	7.2099	73.9412							6.9248	103.559	6.0496	111.868
-105.334	-6.7356			27.361	7.2219	73.7632							6.94	103.448	6.0658	111.57
-105.112	-6.7518			27.361	7.238	73.5442							6.9517	103.401	6.0812	111.23
-104.917	-6.7686			27.361	7.2574	73.381							6.9686	103.302	6.0968	110.992
-104.77	-6.7846			27.361	7.2739	73.2946							6.9846	103.269	6.1093	110.84
-104.616	-6.8			27.361	7.2899	73.1393							7	103.254	6.1256	110.621
-104.457	-6.8158			27.361	7.3061	72.8941							7.0167	102.905	6.1412	110.307
-104.251	-6.8358			27.361	7.3224	72.6166							7.0322	102.638	6.1564	110.185
-104.129	-6.8485			27.361	7.3349	72.3906							7.048	102.655	6.173	109.804
-104.044	-6.86			27.361	7.3501	72.1							7.06	102.644	6.1912	108.999
-103.914	-6.88			27.361	7.3663	71.7457							7.0762	102.388	6.2055	108.806
-103.783	-6.8957			27.361	7.3827	71.3339							7.0919	102.215	6.2255	108.686
-103.691	-6.9085			27.361	7.3949	70.9543							7.1084	102.115	6.2414	108.16
-103.559	-6.9248			27.361	7.4102	70.4988							7.125	101.897	6.2568	107.838
-103.448	-6.94			27.361	7.4256	70.1393							7.1448	101.753	6.2692	107.747
-103.401	-6.9517			27.361	7.4378	69.8723							7.16	101.705	6.2855	107.622
-103.302	-6.9686			27.361	7.4585	69.2257							7.1763	101.507	6.3012	107.441
-103.269	-6.9846			27.361	7.4788	68.3321							7.1925	101.241	6.3168	107.175
-103.254	-7			27.361	7.4949	67.6053							7.209	101.006	6.3327	106.973
-102.905	-7.0167			27.361	7.51	67.0302							7.22	100.95	6.3492	106.866
-102.638	-7.0322			27.361	7.5254	66.717							7.236	100.831	6.3656	106.688
-102.655	-7.048			27.361	7.5414	66.5355							7.2522	100.696	6.3812	106.336
-102.644	-7.06			27.361	7.5546	66.3548							7.2687	100.603	6.4012	106.086
-102.388	-7.0762			27.361	7.5703	65.9971							7.2849	100.496	6.4167	105.945
-102.215	-7.0919			27.361	7.5862	65.5974							7.3001	100.344	6.4295	105.799
-102.115	-7.1084			27.361	7.6016	65.4046							7.32	100.159	6.4458	105.605
-101.897	-7.125			27.361	7.6177	65.2074							7.3363	100.013	6.4612	105.466
-101.753	-7.1448			27.361	7.6348	64.8898							7.3521	99.867	6.4768	105.334
-101.705	-7.16			27.361	7.6549	64.0966							7.3687	99.82	6.493	105.112
-101.507	-7.1763			27.361	7.6701	63.5119							7.38	99.787	6.5098	104.917
-101.241	-7.1925			27.361	7.6859	62.9447							7.3963	99.652	6.5258	104.77
-101.006	-7.209			27.361	7.7021	62.4151							7.4126	99.487	6.5412	104.616
-100.95	-7.22			27.361	7.7179	61.9674							7.4287	99.383	6.557	104.457
-100.831	-7.236			27.361	7.7345	61.5687							7.4448	99.311	6.577	104.251
-100.696	-7.2522			27.361	7.7499	61.2275							7.4602	99.206	6.5897	104.129
-100.603	-7.2687			27.361	7.7617	60.9884							7.485	98.933	6.6012	104.044
-100.496	-7.2849			27.361	7.7778	60.6908							7.5001	98.832	6.6212	103.914
-100.344	-7.3001			27.361	7.7946	60.3645							7.5161	98.776	6.6369	103.783
-100.159	-7.32			27.361	7.81	60.0146							7.532	98.758	6.6497	103.691
-100.013	-7.3363			27.361	7.8301	59.5695							7.5447	98.775	6.666	103.559
-99.867	-7.3521			27.361	7.8458	59.3104							7.56	98.779	6.6812	103.448
-99.82	-7.3687			27.361	7.862	59.0434							7.5763	98.739	6.6929	103.401
-99.787	-7.38			27.361	7.8748	58.8715							7.6005	98.536	6.7098	103.302
-99.652	-7.3963			27.361	7.8899	58.5442							7.6123	98.493	6.7258	103.269
-99.487	-7.4126			27.361	7.9063	58.0992							7.6287	98.453	6.7412	103.254
-99.383	-7.4287			27.361	7.9224	57.7772							7.6404	98.393	6.7579	102.905
-99.311	-7.4448			27.361	7.9382	57.5879							7.6525	98.333	6.7734	102.638
-99.206	-7.4602			27.361	7.9547	57.3531							7.6689	98.267	6.7892	102.655
-98.933	-7.485			27.361	7.9705	57.0809							7.6801	98.245	6.8012	102.644
-98.832	-7.5001			27.361	7.9865	56.861							7.696	98.226	6.8174	102.388
-98.776	-7.5161			27.361	8.0064	56.5949							7.7087	98.242	6.8331	102.215
-98.758	-7.532			27.361	8.0225	56.45							7.725	98.256	6.8496	102.115
-98.775	-7.5447			27.361	8.0388	56.3348							7.7362	98.228	6.8662	101.897
-98.779	-7.56			27.361	8.0549	56.2327							7.749	98.201	6.886	101.753
-98.739	-7.5763			27.361	8.071	56.1088							7.765	98.14	6.9012	101.705
-98.536	-7.6005			27.361	8.0869	55.9779							7.7765	98.062	6.9175	101.507
-98.493	-7.6123			27.361	8.0991	55.8846							7.7926	97.983	6.9337	101.241
-98.453	-7.6287			27.361	8.1149	55.7266							7.805	97.949	6.9502	101.006
-98.393	-7.6404			27.361	8.1308	55.573							7.8201	97.929	6.9612	100.95
-98.333	-7.6525			27.361	8.1467	55.4596							7.8322	97.911	6.9772	100.831
-98.267	-7.6689			27.361	8.1629	55.3409							7.8488	97.883	6.9934	100.696
-98.245	-7.6801			27.361	8.1829	55.2039							7.86	97.853	7.0099	100.603
-98.226	-7.696			27.361	8.1992	55.0922							7.8722	97.841	7.0261	100.496
-98.242	-7.7087			27.361	8.2149	54.9395							7.8887	97.807	7.0413	100.344
-98.256	-7.725			27.361	8.2317	54.642							7.9	97.761	7.0612	100.159
-98.228	-7.7362			27.361	8.2441	54.3348							7.9161	97.69	7.0775	100.013
-98.201	-7.749			27.361	8.2598	53.9605							7.9288	97.65	7.0933	99.867
-98.14	-7.765			27.361	8.2749	53.6455							7.9448	97.63	7.1099	99.82
-98.062	-7.7765			27.361	8.2913	53.3305							7.9559	97.598	7.1212	99.787
-97.983	-7.7926			27.361	8.3072	53.1272							7.9687	97.543	7.1375	99.652
-97.949	-7.805			27.361	8.3231	52.9387							7.985	97.49	7.1538	99.487
-97.929	-7.8201			27.361	8.3393	52.7982							7.9962	97.478	7.1699	99.383
-97.911	-7.8322			27.361	8.3592	52.6464							8.0121	97.476	7.186	99.311
-97.883	-7.8488			27.361	8.3749	52.5094							8.04	97.434	7.2014	99.206
-97.853	-7.86			27.361	8.391	52.3828							8.0563	97.37	7.2262	98.933
-97.841	-7.8722			27.361	8.4071	52.1385							8.0725	97.299	7.2413	98.832
-97.807	-7.8887			27.361	8.4231	51.9361							8.0893	97.196	7.2573	98.776
-97.761	-7.9			27.361	8.439	51.7519							8.105	97.11	7.2732	98.758
-97.69	-7.9161			27.361	8.4549	51.5556							8.1206	97.031	7.2859	98.775
-97.65	-7.9288			27.361	8.4707	51.3444							8.1363	97.005	7.3012	98.779
-97.63	-7.9448			27.361	8.4903	51.1586							8.1519	97.02	7.3175	98.739
-97.598	-7.9559			27.361	8.5065	50.9701							8.1644	97.063	7.3417	98.536
-97.543	-7.9687			27.361	8.5226	50.8095							8.18	97.079	7.3535	98.493
-97.49	-7.985			27.361	8.5387	50.6045							8.2004	97	7.3699	98.453
-97.478	-7.9962			27.361	8.5504	50.4108							8.2167	96.829	7.3816	98.393
-97.476	-8.0121			27.361	8.5666	50.128							8.2326	96.672	7.3937	98.333
-97.434	-8.04			27.361	8.5822	49.9169							8.2487	96.654	7.4101	98.267
-97.37	-8.0563			27.361	8.598	49.738							8.2644	96.677	7.4213	98.245
-97.299	-8.0725			27.361	8.6148	49.5303							8.2804	96.65	7.4372	98.226
-97.196	-8.0893			27.361	8.6301	49.3034							8.2966	96.596	7.4499	98.242
-97.11	-8.105			27.361	8.646	49.0172							8.3092	96.548	7.4662	98.256
-97.031	-8.1206			27.361	8.6663	48.5914							8.325	96.396	7.4774	98.228
-97.005	-8.1363			27.361	8.6825	48.2267							8.3365	96.329	7.4902	98.201
-97.02	-8.1519			27.361	8.6989	47.8096							8.3524	96.231	7.5062	98.14
-97.063	-8.1644			27.361	8.7149	47.252							8.365	96.148	7.5177	98.062
-97.079	-8.18			27.361	8.7307	46.6691							8.3803	96.01	7.5338	97.983
-97	-8.2004			27.361	8.7467	46.0626							8.3966	95.837	7.5462	97.949
-96.829	-8.2167			27.361	8.7624	45.5905							8.4129	95.677	7.5613	97.929
-96.672	-8.2326			27.361	8.7783	45.2145							8.4295	95.567	7.5734	97.911
-96.654	-8.2487			27.361	8.7979	44.889							8.4405	95.469	7.59	97.883
-96.677	-8.2644			27.361	8.8144	44.7345							8.4565	95.395	7.6012	97.853
-96.65	-8.2804			27.361	8.8299	44.5757							8.469	95.343	7.6134	97.841
-96.596	-8.2966			27.361	8.8455	44.3453							8.485	95.254	7.6299	97.807
-96.548	-8.3092			27.361	8.8622	43.9623							8.5001	95.131	7.6412	97.761
-96.396	-8.325			27.361	8.8785	43.4091							8.5169	94.865	7.6573	97.69
-96.329	-8.3365			27.361	8.8946	42.7572							8.5335	94.571	7.67	97.65
-96.231	-8.3524			27.361	8.9099	42.1708							8.5499	94.315	7.686	97.63
-96.148	-8.365			27.361	8.9299	41.5661							8.5602	94.159	7.6971	97.598
-96.01	-8.3803			27.361	8.9458	41.1246							8.5758	93.973	7.7099	97.543
-95.837	-8.3966			27.361	8.9615	40.9605							8.5925	93.681	7.7262	97.49
-95.677	-8.4129			27.361	8.9771	40.9012							8.6132	93.072	7.7374	97.478
-95.567	-8.4295			27.361	8.9943	40.7529							8.6331	92.368	7.7533	97.476
-95.469	-8.4405			27.361	9.0099	40.5408							8.645	92.032	7.7812	97.434
-95.395	-8.4565			27.361	9.0255	40.2415							8.6601	91.685	7.7975	97.37
-95.343	-8.469			27.361	9.0415	39.9387							8.6722	91.467	7.8137	97.299
-95.254	-8.485			27.361	9.062	39.3864							8.6888	91.224	7.8305	97.196
-95.131	-8.5001			27.361	9.0747	39.1482							8.7001	91.037	7.8462	97.11
-94.865	-8.5169			27.361	9.0852	38.985							8.7163	90.843	7.8618	97.031
-94.571	-8.5335			27.361	9.1052	38.7485							8.729	90.682	7.8775	97.005
-94.315	-8.5499			27.361	9.1217	38.5941							8.745	90.389	7.8931	97.02
-94.159	-8.5602			27.361	9.1385	38.3009							8.757	90.168	7.9056	97.063
-93.973	-8.5758			27.361	9.1549	37.9195							8.7731	89.878	7.9212	97.079
-93.681	-8.5925			27.361	9.1701	37.5801							8.785	89.645	7.9416	97
-93.072	-8.6132			27.361	9.1856	37.3925							8.7969	89.399	7.9579	96.829
-92.368	-8.6331			27.361	9.1981	37.2616							8.8131	88.973	7.9738	96.672
-92.032	-8.645			27.361	9.2149	37.0941							8.8252	88.61	7.9899	96.654
-91.685	-8.6601			27.361	9.2299	37.0155							8.8409	88.201	8.0056	96.677
-91.467	-8.6722			27.361	9.2458	36.9012							8.8526	87.95	8.0216	96.65
-91.224	-8.6888			27.361	9.2625	36.711							8.865	87.717	8.0378	96.596
-91.037	-8.7001			27.361	9.282	36.5862							8.8807	87.419	8.0504	96.548
-90.843	-8.7163			27.361	9.298	36.4152							8.8929	87.21	8.0662	96.396
-90.682	-8.729			27.361	9.3146	36.314							8.9096	86.848	8.0777	96.329
-90.389	-8.745			27.361	9.3299	36.3157							8.921	86.516	8.0936	96.231
-90.168	-8.757			27.361	9.3452	36.2991							8.9374	86.016	8.1062	96.148
-89.878	-8.7731			27.361	9.3614	36.2834							8.95	85.607	8.1215	96.01
-89.645	-8.785			27.361	9.3775	36.2162							8.965	85.218	8.1378	95.837
-89.399	-8.7969			27.361	9.3941	36.0583							8.9763	85.064	8.1541	95.677
-88.973	-8.8131			27.361	9.4139	35.8977							8.989	84.928	8.1707	95.567
-88.61	-8.8252			27.361	9.43	35.629							9.005	84.737	8.1817	95.469
-88.201	-8.8409			27.361	9.4453	35.5051							9.017	84.533	8.1977	95.395
-87.95	-8.8526			27.361	9.4616	35.4335							9.0331	84.282	8.2102	95.343
-87.717	-8.865			27.361	9.4782	35.3009							9.0525	84.095	8.2262	95.254
-87.419	-8.8807			27.361	9.4902	35.1735							9.069	83.996	8.2413	95.131
-87.21	-8.8929			27.361	9.5099	34.9737							9.085	83.818	8.2581	94.865
-86.848	-8.9096			27.361	9.5255	34.8908							9.1012	83.537	8.2747	94.571
-86.516	-8.921			27.361	9.5377	34.8454							9.1175	83.219	8.2911	94.315
-86.016	-8.9374			27.361	9.5499	34.8009							9.13	82.96	8.3014	94.159
-85.607	-8.95			27.361	9.5657	34.7407							9.1452	82.627	8.317	93.973
-85.218	-8.965			27.361	9.578	34.6909							9.1614	82.221	8.3337	93.681
-85.064	-8.9763			27.361	9.5946	34.5932							9.1778	81.749	8.3544	93.072
-84.928	-8.989			27.361	9.6056	34.4833							9.19	81.314	8.3743	92.368
-84.737	-9.005			27.361	9.6221	34.321							9.2053	80.792	8.3862	92.032
-84.533	-9.017			27.361	9.6349	34.17							9.2207	80.38	8.4013	91.685
-84.282	-9.0331			27.361	9.6499	34.1028							9.2329	80.074	8.4134	91.467
-84.095	-9.0525			27.361	9.6611	34.1159							9.2536	79.333	8.43	91.224
-83.996	-9.069			27.361	9.6741	34.1334							9.2739	78.309	8.4413	91.037
-83.818	-9.085			27.361	9.6945	34.1342							9.29	77.476	8.4575	90.843
-83.537	-9.1012			27.361	9.7098	34.1552							9.3051	76.817	8.4702	90.682
-83.219	-9.1175			27.361	9.7258	34.1552							9.3205	76.458	8.4862	90.389
-82.96	-9.13			27.361	9.742	34.1944							9.3365	76.25	8.4982	90.168
-82.627	-9.1452			27.361	9.758	34.2381							9.3497	76.043	8.5143	89.878
-82.221	-9.1614			27.361	9.7745	34.3201							9.3654	75.633	8.5262	89.645
-81.749	-9.1778			27.361	9.7899	34.3681							9.3813	75.175	8.5381	89.399
-81.314	-9.19			27.361	9.8059	34.4117							9.3967	74.954	8.5543	88.973
-80.792	-9.2053			27.361	9.8182	34.4361							9.4128	74.728	8.5664	88.61
-80.38	-9.2207			27.361	9.8348	34.3576							9.4299	74.364	8.5821	88.201
-80.074	-9.2329			27.361	9.8499	34.3323							9.45	73.455	8.5938	87.95
-79.333	-9.2536			27.361	9.8699	34.4309							9.4652	72.785	8.6062	87.717
-78.309	-9.2739			27.361	9.8858	34.4597							9.481	72.135	8.6219	87.419
-77.476	-9.29			27.361	9.9019	34.4457							9.4972	71.528	8.6341	87.21
-76.817	-9.3051			27.361	9.9175	34.4292							9.513	71.015	8.6508	86.848
-76.458	-9.3205			27.361	9.9337	34.3672							9.5296	70.558	8.6622	86.516
-76.25	-9.3365			27.361	9.9499	34.2346							9.545	70.167	8.6786	86.016
-76.043	-9.3497			27.361	9.9647	33.9178							9.5568	69.893	8.6912	85.607
-75.633	-9.3654			27.361	9.9799	33.3585							9.5729	69.552	8.7062	85.218
-75.175	-9.3813			27.361	9.9997	32.7023							9.5897	69.178	8.7175	85.064
-74.954	-9.3967			27.361	10.0112	32.1168							9.6051	68.777	8.7302	84.928
-74.728	-9.4128			27.361	10.0236	31.6787							9.6252	68.267	8.7462	84.737
-74.364	-9.4299			27.361	10.0441	31.2398							9.6409	67.97	8.7582	84.533
-73.455	-9.45			27.361	10.0599	30.8707							9.6571	67.664	8.7743	84.282
-72.785	-9.4652			27.361	10.0725	30.6159							9.6699	67.467	8.7937	84.095
-72.135	-9.481			27.361	10.088	30.1805							9.685	67.092	8.8102	83.996
-71.528	-9.4972			27.361	10.1073	29.4449							9.7014	66.582	8.8262	83.818
-71.015	-9.513			27.361	10.1243	29.0644							9.7175	66.213	8.8424	83.537
-70.558	-9.5296			27.361	10.14	29.0452							9.7333	65.996	8.8587	83.219
-70.167	-9.545			27.361	10.1562	29.0138							9.7498	65.727	8.8712	82.96
-69.893	-9.5568			27.361	10.1758	28.8733							9.7656	65.415	8.8864	82.627
-69.552	-9.5729			27.361	10.1914	28.4536							9.7816	65.163	8.9026	82.221
-69.178	-9.5897			27.361	10.21	26.828							9.8015	64.858	8.919	81.749
-68.777	-9.6051			27.361	10.2267	26.2678							9.8176	64.692	8.9312	81.314
-68.267	-9.6252			27.361	10.2435	25.9222							9.8339	64.56	8.9465	80.792
-67.97	-9.6409			27.361	10.2644	25.7931							9.85	64.443	8.9619	80.38
-67.664	-9.6571			27.361	10.2799	25.8367							9.8661	64.301	8.9741	80.074
-67.467	-9.6699			27.361	10.2964	25.9754							9.882	64.151	8.9948	79.333
-67.092	-9.685			27.361	10.3132	26.102							9.8942	64.044	9.0151	78.309
-66.582	-9.7014			27.361	10.325	26.225							9.91	63.863	9.0312	77.476
-66.213	-9.7175			27.361	10.3409	26.3734							9.9259	63.687	9.0463	76.817
-65.996	-9.7333			27.361	10.3572	26.5042							9.9418	63.557	9.0617	76.458
-65.727	-9.7498			27.361	10.374	26.6159							9.958	63.421	9.0777	76.25
-65.415	-9.7656			27.361	10.39	26.7302							9.978	63.264	9.0909	76.043
-65.163	-9.7816			27.361	10.4054	26.8699							9.9943	63.136	9.1066	75.633
-64.858	-9.8015			27.361	10.4215	26.9222							10.01	62.961	9.1225	75.175
-64.692	-9.8176			27.361	10.4415	26.9458							10.0268	62.62	9.1379	74.954
-64.56	-9.8339			27.361	10.4575	27.0147							10.0392	62.268	9.154	74.728
-64.443	-9.85			27.361	10.4741	27.1098							10.0549	61.839	9.1711	74.364
-64.301	-9.8661			27.361	10.4899	27.1927							10.07	61.478	9.1912	73.455
-64.151	-9.882			27.361	10.5055	27.2364							10.0864	61.117	9.2064	72.785
-64.044	-9.8942			27.361	10.5215	27.2608							10.1023	60.884	9.2222	72.135
-63.863	-9.91			27.361	10.5377	27.2931							10.1182	60.668	9.2384	71.528
-63.687	-9.9259			27.361	10.5543	27.3288							10.1344	60.507	9.2542	71.015
-63.557	-9.9418			27.361	10.5744	27.396							10.1543	60.333	9.2708	70.558
-63.421	-9.958			27.361	10.5899	27.4458							10.17	60.176	9.2862	70.167
-63.264	-9.978			27.361	10.6052	27.5173							10.1861	60.031	9.298	69.893
-63.136	-9.9943			27.361	10.6214	27.5627							10.2022	59.751	9.3141	69.552
-62.961	-10.01			27.361	10.6342	27.5435							10.2182	59.519	9.3309	69.178
-62.62	-10.0268			27.361	10.6499	27.5409							10.2341	59.308	9.3463	68.777
-62.268	-10.0392			27.361	10.665	27.54							10.25	59.083	9.3664	68.267
-61.839	-10.0549			27.361	10.681	27.4737							10.2658	58.841	9.3821	67.97
-61.478	-10.07			27.361	10.6972	27.4894							10.2854	58.628	9.3983	67.664
-61.117	-10.0864			27.361	10.7139	27.5165							10.3016	58.412	9.4111	67.467
-60.884	-10.1023			27.361	10.7341	27.5819							10.3177	58.228	9.4262	67.092
-60.668	-10.1182			27.361	10.7499	27.547							10.3338	57.993	9.4426	66.582
-60.507	-10.1344			27.361	10.7613	27.4911							10.3455	57.771	9.4587	66.213
-60.333	-10.1543			27.361	10.7742	27.4877							10.3617	57.447	9.4745	65.996
-60.176	-10.17			27.361	10.7899	27.533							10.3773	57.205	9.491	65.727
-60.031	-10.1861			27.361	10.8016	27.6055							10.3931	57	9.5068	65.415
-59.751	-10.2022			27.361	10.8179	27.6962							10.4099	56.762	9.5228	65.163
-59.519	-10.2182			27.361	10.8299	27.7154							10.4252	56.502	9.5427	64.858
-59.308	-10.2341			27.361	10.8457	27.7704							10.4411	56.174	9.5588	64.692
-59.083	-10.25			27.361	10.8578	27.8254							10.4614	55.686	9.5751	64.56
-58.841	-10.2658			27.361	10.8745	27.924							10.4776	55.268	9.5912	64.443
-58.628	-10.2854			27.361	10.89	27.9807							10.494	54.79	9.6073	64.301
-58.412	-10.3016			27.361	10.9054	27.9501							10.51	54.151	9.6232	64.151
-58.228	-10.3177			27.361	10.9254	27.9781							10.5258	53.483	9.6354	64.044
-57.993	-10.3338			27.361	10.9416	28.0374							10.5418	52.788	9.6512	63.863
-57.771	-10.3455			27.361	10.9547	28.0618							10.5575	52.247	9.6671	63.687
-57.447	-10.3617			27.361	10.9699	28.102							10.5734	51.816	9.683	63.557
-57.205	-10.3773			27.361	10.986	28.163							10.593	51.443	9.6992	63.421
-57	-10.3931			27.361	11.002	28.2128							10.6095	51.266	9.7192	63.264
-56.762	-10.4099			27.361	11.0181	28.2747							10.625	51.084	9.7355	63.136
-56.502	-10.4252			27.361	11.0349	28.3018							10.6406	50.82	9.7512	62.961
-56.174	-10.4411			27.361	11.0499	28.3262							10.6573	50.381	9.768	62.62
-55.686	-10.4614			27.361	11.0619	28.3411							10.6736	49.747	9.7804	62.268
-55.268	-10.4776			27.361	11.0778	28.355							10.6897	49	9.7961	61.839
-54.79	-10.494			27.361	11.0946	28.3288							10.705	48.328	9.8112	61.478
-54.151	-10.51			27.361	11.1099	28.2206							10.725	47.635	9.8276	61.117
-53.483	-10.5258			27.361	11.1249	28.1517							10.7409	47.129	9.8435	60.884
-52.788	-10.5418			27.361	11.1449	28.0278							10.7566	46.941	9.8594	60.668
-52.247	-10.5575			27.361	11.1564	27.9126							10.7722	46.873	9.8756	60.507
-51.816	-10.5734			27.361	11.1682	27.5575							10.7894	46.703	9.8955	60.333
-51.443	-10.593			27.361	11.1885	27.1945							10.805	46.46	9.9112	60.176
-51.266	-10.6095			27.361	11.2088	27.0173							10.8206	46.117	9.9273	60.031
-51.084	-10.625			27.361	11.2199	26.7992							10.8366	45.77	9.9434	59.751
-50.82	-10.6406			27.361	11.2355	26.5156							10.8571	45.137	9.9594	59.519
-50.381	-10.6573			27.361	11.2484	26.2669							10.8698	44.864	9.9753	59.308
-49.747	-10.6736			27.361	11.2632	25.4877							10.8803	44.677	9.9912	59.083
-49	-10.6897			27.361	11.2749	25.0138							10.9003	44.406	10.007	58.841
-48.328	-10.705			27.361	11.2913	24.5601							10.9168	44.229	10.0266	58.628
-47.635	-10.725			27.361	11.3039	24.3193							10.9336	43.893	10.0428	58.412
-47.129	-10.7409			27.361	11.3199	24.0584							10.95	43.456	10.0589	58.228
-46.941	-10.7566			27.361	11.3323	24.0139							10.9652	43.067	10.075	57.993
-46.873	-10.7722			27.361	11.3447	24.0086							10.9807	42.852	10.0867	57.771
-46.703	-10.7894			27.361	11.3599	24.0069							10.9932	42.702	10.1029	57.447
-46.46	-10.805			27.361	11.373	23.9885							11.01	42.51	10.1185	57.205
-46.117	-10.8206			27.361	11.3888	23.7294							11.025	42.42	10.1343	57
-45.77	-10.8366			27.361	11.4	23.602							11.0409	42.289	10.1511	56.762
-45.137	-10.8571			27.361	11.4158	23.3978							11.0576	42.071	10.1664	56.502
-44.864	-10.8698			27.361	11.4294	23.431							11.0771	41.928	10.1823	56.174
-44.677	-10.8803			27.361	11.4408	23.5139							11.0931	41.732	10.2026	55.686
-44.406	-10.9003			27.361	11.4573	23.6439							11.1097	41.616	10.2188	55.268
-44.229	-10.9168			27.361	11.4699	23.766							11.125	41.618	10.2352	54.79
-43.893	-10.9336			27.361	11.4855	23.7556							11.1403	41.599	10.2512	54.151
-43.456	-10.95			27.361	11.4975	23.7896							11.1565	41.581	10.267	53.483
-43.067	-10.9652			27.361	11.5144	23.876							11.1726	41.504	10.283	52.788
-42.852	-10.9807			27.361	11.5257	23.9022							11.1892	41.323	10.2987	52.247
-42.702	-10.9932			27.361	11.5415	23.876							11.209	41.139	10.3146	51.816
-42.51	-11.01			27.361	11.5544	23.8891							11.2251	40.831	10.3342	51.443
-42.42	-11.025			27.361	11.5656	23.9519							11.2404	40.689	10.3507	51.266
-42.289	-11.0409			27.361	11.5817	24.0479							11.2567	40.607	10.3662	51.084
-42.071	-11.0576			27.361	11.5946	24.1421							11.2733	40.455	10.3818	50.82
-41.928	-11.0771			27.361	11.6099	24.2285							11.2853	40.309	10.3985	50.381
-41.732	-11.0931			27.361	11.622	24.2992							11.305	40.08	10.4148	49.747
-41.616	-11.1097			27.361	11.6381	24.3577							11.3206	39.985	10.4309	49
-41.618	-11.125			27.361	11.6499	24.4536							11.3328	39.933	10.4462	48.328
-41.599	-11.1403			27.361	11.6622	24.5322							11.345	39.882	10.4662	47.635
-41.581	-11.1565			27.361	11.6784	24.6378							11.3608	39.813	10.4821	47.129
-41.504	-11.1726			27.361	11.69	24.7023							11.3731	39.756	10.4978	46.941
-41.323	-11.1892			27.361	11.7061	24.8132							11.3897	39.644	10.5134	46.873
-41.139	-11.209			27.361	11.7182	24.9013							11.4007	39.518	10.5306	46.703
-40.831	-11.2251			27.361	11.7347	25.0287							11.4172	39.332	10.5462	46.46
-40.689	-11.2404			27.361	11.7459	25.1133							11.43	39.159	10.5618	46.117
-40.607	-11.2567			27.361	11.7621	25.2573							11.445	39.082	10.5778	45.77
-40.455	-11.2733			27.361	11.7747	25.3367							11.4562	39.097	10.5983	45.137
-40.309	-11.2853			27.361	11.7861	25.4179							11.4692	39.117	10.611	44.864
-40.08	-11.305			27.361	11.8022	25.5732							11.4896	39.118	10.6215	44.677
-39.985	-11.3206			27.361	11.8149	25.6919							11.5049	39.142	10.6415	44.406
-39.933	-11.3328			27.361	11.83	25.8158							11.5209	39.142	10.658	44.229
-39.882	-11.345			27.361	11.8424	25.9039							11.5371	39.187	10.6748	43.893
-39.813	-11.3608			27.361	11.8549	25.9772							11.5531	39.237	10.6912	43.456
-39.756	-11.3731			27.361	11.87	26.1133							11.5696	39.331	10.7064	43.067
-39.644	-11.3897			27.361	11.8823	26.232							11.585	39.386	10.7219	42.852
-39.518	-11.4007			27.361	11.8984	26.3812							11.601	39.436	10.7344	42.702
-39.332	-11.4172			27.361	11.9101	26.499							11.6133	39.464	10.7512	42.51
-39.159	-11.43			27.361	11.9264	26.6473							11.6299	39.374	10.7662	42.42
-39.082	-11.445			27.361	11.9386	26.7582							11.645	39.345	10.7821	42.289
-39.097	-11.4562			27.361	11.9549	26.9301							11.665	39.458	10.7988	42.071
-39.117	-11.4692			27.361	11.9663	27.0444							11.6809	39.491	10.8183	41.928
-39.118	-11.4896			27.361	11.9823	27.2119							11.697	39.475	10.8343	41.732
-39.142	-11.5049			27.361	11.9949	27.3315							11.7126	39.456	10.8509	41.616
-39.142	-11.5209			27.361	12.0063	27.4292							11.7288	39.385	10.8662	41.618
-39.187	-11.5371			27.361	12.0223	27.5967							11.745	39.233	10.8815	41.599
-39.237	-11.5531			27.361	12.0349	27.7102							11.7598	38.87	10.8977	41.581
-39.331	-11.5696			27.361	12.05	27.8672							11.775	38.229	10.9138	41.504
-39.386	-11.585			27.361	12.0623	27.9903							11.7948	37.477	10.9304	41.323
-39.436	-11.601			27.361	12.075	28.0854							11.8063	36.806	10.9502	41.139
-39.464	-11.6133			27.361	12.0899	28.2407							11.8187	36.304	10.9663	40.831
-39.374	-11.6299			27.361	12.1021	28.3768							11.8392	35.801	10.9816	40.689
-39.345	-11.645			27.361	12.1182	28.5304							11.855	35.378	10.9979	40.607
-39.458	-11.665			27.361	12.1299	28.6569							11.8676	35.086	11.0145	40.455
-39.491	-11.6809			27.361	12.1459	28.8341							11.8831	34.587	11.0265	40.309
-39.475	-11.697			27.361	12.1582	28.9466							11.9024	33.744	11.0462	40.08
-39.456	-11.7126			27.361	12.1748	29.1063							11.9194	33.308	11.0618	39.985
-39.385	-11.7288			27.361	12.1858	29.2206							11.9351	33.286	11.074	39.933
-39.233	-11.745			27.361	12.2021	29.3149							11.9513	33.25	11.0862	39.882
-38.87	-11.7598			27.361	12.2146	29.4562							11.9709	33.089	11.102	39.813
-38.229	-11.775			27.361	12.2258	29.5679							11.9865	32.608	11.1143	39.756
-37.477	-11.7948			27.361	12.242	29.691							12.0051	30.745	11.1309	39.644
-36.806	-11.8063			27.361	12.2546	29.7782							12.0218	30.103	11.1419	39.518
-36.304	-11.8187			27.361	12.2699	29.9091							12.0386	29.707	11.1584	39.332
-35.801	-11.8392			27.361	12.2819	30.0103							12.0595	29.559	11.1712	39.159
-35.378	-11.855			27.361	12.2945	30.1255							12.075	29.609	11.1862	39.082
-35.086	-11.8676			27.361	12.3099	30.2721							12.0915	29.768	11.1974	39.097
-34.587	-11.8831			27.361	12.3221	30.3664							12.1083	29.913	11.2104	39.117
-33.744	-11.9024			27.361	12.3382	30.4964							12.1201	30.054	11.2308	39.118
-33.308	-11.9194			27.361	12.3499	30.6037							12.136	30.224	11.2461	39.142
-33.286	-11.9351			27.361	12.366	30.7398							12.1523	30.374	11.2621	39.142
-33.25	-11.9513			27.361	12.3782	30.8384							12.1691	30.502	11.2783	39.187
-33.089	-11.9709			27.361	12.3947	31.0086							12.1851	30.633	11.2943	39.237
-32.608	-11.9865			27.361	12.4059	31.1246							12.2005	30.793	11.3108	39.331
-30.745	-12.0051			27.361	12.418	31.2433							12.2166	30.853	11.3262	39.386
-30.103	-12.0218			27.361	12.4346	31.4109							12.2366	30.88	11.3422	39.436
-29.707	-12.0386			27.361	12.4459	31.5452							12.2526	30.959	11.3545	39.464
-29.559	-12.0595			27.361	12.4619	31.7136							12.2692	31.068	11.3711	39.374
-29.609	-12.075			27.361	12.4747	31.8445							12.285	31.163	11.3862	39.345
-29.768	-12.0915			27.361	12.4899	32.0068							12.3006	31.213	11.4062	39.458
-29.913	-12.1083			27.361	12.502	32.1447							12.3166	31.241	11.4221	39.491
-30.054	-12.1201			27.361	12.5147	32.2826							12.3328	31.278	11.4382	39.475
-30.224	-12.136			27.361	12.5299	32.4388							12.3494	31.319	11.4538	39.456
-30.374	-12.1523			27.361	12.5421	32.5243							12.3695	31.396	11.47	39.385
-30.502	-12.1691			27.361	12.5582	32.6648							12.385	31.453	11.4862	39.233
-30.633	-12.1851			27.361	12.57	32.773							12.4003	31.535	11.501	38.87
-30.793	-12.2005			27.361	12.586	32.9047							12.4165	31.587	11.5162	38.229
-30.853	-12.2166			27.361	12.5982	33.0094							12.4293	31.565	11.536	37.477
-30.88	-12.2366			27.361	12.6148	33.143							12.445	31.562	11.5475	36.806
-30.959	-12.2526			27.361	12.6259	33.2363							12.4601	31.561	11.5599	36.304
-31.068	-12.2692			27.361	12.638	33.3349							12.4761	31.485	11.5804	35.801
-31.163	-12.285			27.361	12.6545	33.4833							12.4923	31.503	11.5962	35.378
-31.213	-12.3006			27.361	12.6656	33.6019							12.509	31.534	11.6088	35.086
-31.241	-12.3166			27.361	12.6819	33.7267							12.5292	31.609	11.6243	34.587
-31.278	-12.3328			27.361	12.6945	33.8532							12.545	31.569	11.6436	33.744
-31.319	-12.3494			27.361	12.7098	33.9981							12.5564	31.505	11.6606	33.308
-31.396	-12.3695			27.361	12.7218	34.0836							12.5693	31.501	11.6763	33.286
-31.453	-12.385			27.361	12.7345	34.2075							12.585	31.553	11.6925	33.25
-31.535	-12.4003			27.361	12.7499	34.362							12.5967	31.636	11.7121	33.089
-31.587	-12.4165			27.361	12.7621	34.4414							12.613	31.74	11.7277	32.608
-31.565	-12.4293			27.361	12.7781	34.5827							12.625	31.762	11.7463	30.745
-31.562	-12.445			27.361	12.7899	34.711							12.6408	31.825	11.763	30.103
-31.561	-12.4601			27.361	12.8059	34.8279							12.6529	31.888	11.7798	29.707
-31.485	-12.4761			27.361	12.8182	34.9178							12.6696	32.001	11.8007	29.559
-31.503	-12.4923			27.361	12.8347	35.0827							12.6851	32.066	11.8162	29.609
-31.534	-12.509			27.361	12.846	35.1831							12.7005	32.031	11.8327	29.768
-31.609	-12.5292			27.361	12.8582	35.2791							12.7205	32.063	11.8495	29.913
-31.569	-12.545			27.361	12.8749	35.4527							12.7367	32.131	11.8613	30.054
-31.505	-12.5564			27.361	12.8862	35.56							12.7498	32.159	11.8772	30.224
-31.501	-12.5693			27.361	12.9025	35.7005							12.765	32.205	11.8935	30.374
-31.553	-12.585			27.361	12.9149	35.8262							12.7811	32.275	11.9103	30.502
-31.636	-12.5967			27.361	12.9302	35.9728							12.7971	32.332	11.9263	30.633
-31.74	-12.613			27.361	12.9426	36.0749							12.8132	32.403	11.9417	30.793
-31.762	-12.625			27.361	12.9549	36.1936							12.83	32.434	11.9578	30.853
-31.825	-12.6408			27.361	12.9699	36.341							12.845	32.462	11.9778	30.88
-31.888	-12.6529			27.361	12.982	36.4536							12.857	32.479	11.9938	30.959
-32.001	-12.6696			27.361	12.9984	36.5976							12.8729	32.495	12.0104	31.068
-32.066	-12.6851			27.361	13.0104	36.7101							12.8897	32.465	12.0262	31.163
-32.031	-12.7005			27.361	13.0269	36.8271							12.905	32.341	12.0418	31.213
-32.063	-12.7205			27.361	13.0391	36.9361							12.92	32.262	12.0578	31.241
-32.131	-12.7367			27.361	13.055	37.0696							12.94	32.12	12.074	31.278
-32.159	-12.7498			27.361	13.0674	37.1717							12.9515	31.988	12.0906	31.319
-32.205	-12.765			27.361	13.0794	37.2782							12.9633	31.581	12.1107	31.396
-32.275	-12.7811			27.361	13.0949	37.4527							12.9836	31.165	12.1262	31.453
-32.332	-12.7971			27.361	13.1149	37.6229							13.0039	30.962	12.1415	31.535
-32.403	-12.8132			27.361	13.1308	37.7634							13.015	30.712	12.1577	31.587
-32.434	-12.83			27.361	13.147	37.8698							13.0306	30.387	12.1705	31.565
-32.462	-12.845			27.361	13.1632	37.992							13.0435	30.102	12.1862	31.562
-32.479	-12.857			27.361	13.1792	38.1386							13.0583	29.209	12.2013	31.561
-32.495	-12.8729			27.361	13.195	38.2529							13.07	28.666	12.2173	31.485
-32.465	-12.8897			27.361	13.2107	38.3899							13.0864	28.146	12.2335	31.503
-32.341	-12.905			27.361	13.2306	38.5539							13.099	27.87	12.2502	31.534
-32.262	-12.92			27.361	13.2467	38.6848							13.115	27.571	12.2704	31.609
-32.12	-12.94			27.361	13.2587	38.8166							13.1274	27.52	12.2862	31.569
-31.988	-12.9515			27.361	13.2749	38.9702							13.1398	27.514	12.2976	31.505
-31.581	-12.9633			27.361	13.0179	16.4371							13.155	27.512	12.3105	31.501
-31.165	-12.9836			27.361									13.1681	27.491	12.3262	31.553
-30.962	-13.0039			27.361									13.1839	27.194	12.3379	31.636
-30.712	-13.015			27.361									13.1951	27.048	12.3542	31.74
-30.387	-13.0306			27.361									13.2109	26.814	12.3662	31.762
-30.102	-13.0435			27.361									13.2245	26.852	12.382	31.825
-29.209	-13.0583			27.361									13.2359	26.947	12.3941	31.888
-28.666	-13.07			27.361									13.2524	27.096	12.4108	32.001
-28.146	-13.0864			27.361									13.265	27.236	12.4263	32.066
-27.87	-13.099			27.361									13.2806	27.224	12.4417	32.031
-27.571	-13.115			27.361									13.2926	27.263	12.4617	32.063
-27.52	-13.1274												13.3095	27.362	12.4779	32.131
-27.514	-13.1398												13.3208	27.392	12.491	32.159
-27.512	-13.155												13.3366	27.362	12.5062	32.205
-27.491	-13.1681												13.3495	27.377	12.5223	32.275
-27.194	-13.1839												13.3607	27.449	12.5383	32.332
-27.048	-13.1951												13.3768	27.559	12.5544	32.403
-26.814	-13.2109												13.3897	27.667	12.5712	32.434
-26.852	-13.2245												13.405	27.766	12.5862	32.462
-26.947	-13.2359												13.4171	27.847	12.5982	32.479
-27.096	-13.2524												13.4332	27.914	12.6141	32.495
-27.236	-13.265												13.445	28.024	12.6309	32.465
-27.224	-13.2806												13.4573	28.114	12.6462	32.341
-27.263	-13.2926												13.4735	28.235	12.6612	32.262
-27.362	-13.3095												13.4851	28.309	12.6812	32.12
-27.392	-13.3208												13.5012	28.436	12.6927	31.988
-27.362	-13.3366												13.5133	28.537	12.7045	31.581
-27.377	-13.3495												13.5298	28.683	12.7248	31.165
-27.449	-13.3607												13.541	28.78	12.7451	30.962
-27.559	-13.3768												13.5572	28.945	12.7562	30.712
-27.667	-13.3897												13.5698	29.036	12.7718	30.387
-27.766	-13.405												13.5812	29.129	12.7847	30.102
-27.847	-13.4171												13.5973	29.307	12.7995	29.209
-27.914	-13.4332												13.61	29.443	12.8112	28.666
-28.024	-13.445												13.6251	29.585	12.8276	28.146
-28.114	-13.4573												13.6375	29.686	12.8402	27.87
-28.235	-13.4735												13.65	29.77	12.8562	27.571
-28.309	-13.4851												13.6651	29.926	12.8686	27.52
-28.436	-13.5012												13.6774	30.062	12.881	27.514
-28.537	-13.5133												13.6935	30.233	12.8962	27.512
-28.683	-13.5298												13.7052	30.368	12.9093	27.491
-28.78	-13.541												13.7215	30.538	12.9251	27.194
-28.945	-13.5572												13.7337	30.665	12.9363	27.048
-29.036	-13.5698												13.75	30.862	12.9521	26.814
-29.129	-13.5812												13.7614	30.993	12.9657	26.852
-29.307	-13.5973												13.7774	31.185	12.9771	26.947
-29.443	-13.61												13.79	31.322	12.9936	27.096
-29.585	-13.6251												13.8014	31.434	13.0062	27.236
-29.686	-13.6375												13.8174	31.626	13.0218	27.224
-29.77	-13.65												13.83	31.756	13.0338	27.263
-29.926	-13.6651												13.8451	31.936	13.0507	27.362
-30.062	-13.6774												13.8574	32.077	13.062	27.392
-30.233	-13.6935												13.8701	32.186	13.0778	27.362
-30.368	-13.7052												13.885	32.364	13.0907	27.377
-30.538	-13.7215												13.8972	32.52	13.1019	27.449
-30.665	-13.7337												13.9133	32.696	13.118	27.559
-30.862	-13.75												13.925	32.841	13.1309	27.667
-30.993	-13.7614												13.941	33.044	13.1462	27.766
-31.185	-13.7774												13.9533	33.173	13.1583	27.847
-31.322	-13.79												13.9699	33.356	13.1744	27.914
-31.434	-13.8014												13.9809	33.487	13.1862	28.024
-31.626	-13.8174												13.9972	33.595	13.1985	28.114
-31.756	-13.83												14.0097	33.757	13.2147	28.235
-31.936	-13.8451												14.0209	33.885	13.2263	28.309
-32.077	-13.8574												14.0371	34.026	13.2424	28.436
-32.186	-13.8701												14.0497	34.126	13.2545	28.537
-32.364	-13.885												14.065	34.276	13.271	28.683
-32.52	-13.8972												14.077	34.392	13.2822	28.78
-32.696	-13.9133												14.0896	34.524	13.2984	28.945
-32.841	-13.925												14.105	34.692	13.311	29.036
-33.044	-13.941												14.1172	34.8	13.3224	29.129
-33.173	-13.9533												14.1333	34.949	13.3385	29.307
-33.356	-13.9699												14.145	35.072	13.3512	29.443
-33.487	-13.9809												14.1611	35.228	13.3663	29.585
-33.595	-13.9972												14.1733	35.341	13.3787	29.686
-33.757	-14.0097												14.1898	35.536	13.3912	29.77
-33.885	-14.0209												14.201	35.669	13.4063	29.926
-34.026	-14.0371												14.2131	35.805	13.4186	30.062
-34.126	-14.0497												14.2297	35.997	13.4347	30.233
-34.276	-14.065												14.241	36.151	13.4464	30.368
-34.392	-14.077												14.257	36.344	13.4627	30.538
-34.524	-14.0896												14.2698	36.494	13.4749	30.665
-34.692	-14.105												14.285	36.68	13.4912	30.862
-34.8	-14.1172												14.2971	36.838	13.5026	30.993
-34.949	-14.1333												14.3098	36.996	13.5186	31.185
-35.072	-14.145												14.325	37.175	13.5312	31.322
-35.228	-14.1611												14.3372	37.273	13.5426	31.434
-35.341	-14.1733												14.3533	37.434	13.5586	31.626
-35.536	-14.1898												14.3651	37.558	13.5712	31.756
-35.669	-14.201												14.3811	37.709	13.5863	31.936
-35.805	-14.2131												14.3933	37.829	13.5986	32.077
-35.997	-14.2297												14.4099	37.982	13.6113	32.186
-36.151	-14.241												14.421	38.089	13.6262	32.364
-36.344	-14.257												14.4331	38.202	13.6384	32.52
-36.494	-14.2698												14.4496	38.372	13.6545	32.696
-36.68	-14.285												14.4607	38.508	13.6662	32.841
-36.838	-14.2971												14.477	38.651	13.6822	33.044
-36.996	-14.3098												14.4896	38.796	13.6945	33.173
-37.175	-14.325												14.5049	38.962	13.7111	33.356
-37.273	-14.3372												14.5169	39.06	13.7221	33.487
-37.434	-14.3533												14.5296	39.202	13.7384	33.595
-37.558	-14.3651												14.545	39.379	13.7509	33.757
-37.709	-14.3811												14.5572	39.47	13.7621	33.885
-37.829	-14.3933												14.5732	39.632	13.7783	34.026
-37.982	-14.4099												14.585	39.779	13.7909	34.126
-38.089	-14.421												14.601	39.913	13.8062	34.276
-38.202	-14.4331												14.6133	40.016	13.8182	34.392
-38.372	-14.4496												14.6298	40.205	13.8308	34.524
-38.508	-14.4607												14.6411	40.32	13.8462	34.692
-38.651	-14.477												14.6533	40.43	13.8584	34.8
-38.796	-14.4896												14.67	40.629	13.8745	34.949
-38.962	-14.5049												14.6813	40.752	13.8862	35.072
-39.06	-14.5169												14.6976	40.913	13.9023	35.228
-39.202	-14.5296												14.71	41.057	13.9145	35.341
-39.379	-14.545												14.7253	41.225	13.931	35.536
-39.47	-14.5572												14.7377	41.342	13.9422	35.669
-39.632	-14.5732												14.75	41.478	13.9543	35.805
-39.779	-14.585												14.765	41.647	13.9709	35.997
-39.913	-14.601												14.7771	41.776	13.9822	36.151
-40.016	-14.6133												14.7935	41.941	13.9982	36.344
-40.205	-14.6298												14.8055	42.07	14.011	36.494
-40.32	-14.6411												14.822	42.204	14.0262	36.68
-40.43	-14.6533												14.8342	42.329	14.0383	36.838
-40.629	-14.67												14.8501	42.482	14.051	36.996
-40.752	-14.6813												14.8625	42.599	14.0662	37.175
-40.913	-14.6976												14.8745	42.721	14.0784	37.273
-41.057	-14.71												14.89	42.921	14.0945	37.434
-41.225	-14.7253												14.91	43.116	14.1063	37.558
-41.342	-14.7377												14.9259	43.277	14.1223	37.709
-41.478	-14.75												14.9421	43.399	14.1345	37.829
-41.647	-14.765												14.9583	43.539	14.1511	37.982
-41.776	-14.7771												14.9743	43.707	14.1622	38.089
-41.941	-14.7935												14.9901	43.838	14.1743	38.202
-42.07	-14.8055												15.0058	43.995	14.1908	38.372
-42.204	-14.822												15.0257	44.183	14.2019	38.508
-42.329	-14.8342												15.0418	44.333	14.2182	38.651
-42.482	-14.8501												15.0538	44.484	14.2308	38.796
-42.599	-14.8625												15.07	44.66	14.2461	38.962
-42.721	-14.8745												14.813	18.837	14.2581	39.06
-42.921	-14.89												15.0119	4.2	14.2708	39.202
-43.116	-14.91												15.1094	2.754	14.2862	39.379
-43.277	-14.9259												15.1403	4.14
-43.399	-14.9421												15.1479	3.076
-43.539	-14.9583												15.165	4.432
-43.707	-14.9743												15.1608	3.026
-43.838	-14.9901												15.1715	4.208
-43.995	-15.0058												15.1627	3.052
-44.183	-15.0257												15.1695	4.066
-44.333	-15.0418												15.1662	3.14
-44.484	-15.0538
-44.66	-15.07
-18.837	-14.813
-4.2	-15.0119
-2.754	-15.1094
-4.14	-15.1403
-3.076	-15.1479
-4.432	-15.165
-3.026	-15.1608
-4.208	-15.1715
-3.052	-15.1627
-4.066	-15.1695
-3.14	-15.1662

## Sheet: MA112,5L80
WORKSHOP 3 EXPORTED DATA: [C:\Users\Maleki\2012-4-14\MA112,5L80.W01 - 1]					DISPLACEMENT (mm)	LOAD(KN)								DISPLACEMENT (mm)	LOAD(KN)
*************************************************************************************************				19.751	0	0								0.0051	-0.008
Source of data: ToolKit				19.751	0.0195	0.673991								0.005	-0.006
WS3 File Version: 1.04				19.751	0.0352	1.08763								0.0066	-0.006
Number of bytes in subfile: 7534				19.751	0.0517	1.5937								0.0068	-0.012
Total number of data points: 902				19.751	0.0679	2.10208								0.01	-0.009
Test date: 14/05/2012				19.751	0.084	2.65052								0.0062	-0.007
Test time: 18:47:08				19.751	0.0995	3.22591								0.0093	-0.008
Player Step: 1				19.751	0.1148	3.83135								0.0087	-0.014
Step Capture No: 1				19.751	0.1313	4.50765								0.005	-0.006
Actuator: 1				19.751	0.1512	5.39963								0.005	-0.01
*************************************************************************************************				19.751	0.1635	5.96424								0.006	-0.006
Actuator: 1 Channel:0	Actuator: 1 Channel:1			19.751	0.1833	6.99641								0.005	-0.011
Load Current (kN)	Stroke Current (mm)			19.751	0.199	7.87761								0.0058	-0.01
0.008	-0.0051			19.751	0.2145	8.84199								0.005	-0.01
0.006	-0.005			19.751	0.2303	9.88495								0.005	-0.014
0.006	-0.0066	fc	19.751	19.751	0.2463	11.0188								0.005	-0.011
0.012	-0.0068			19.751	0.2623	12.2089								0.015	0.011
0.009	-0.01			19.751	0.2821	13.8149								0.0388	0.034
0.007	-0.0062			19.751	0.298	15.1675								0.0548	0.038
0.008	-0.0093			19.751	0.3145	16.5609								0.07	0.038
0.014	-0.0087			19.751	0.3295	18.0576								0.0859	0.041
0.006	-0.005			19.751	0.3453	19.6043								0.1023	0.04
0.01	-0.005			19.751	0.3612	21.2103								0.1219	0.05
0.006	-0.006			19.751	0.3771	22.8826								0.1416	0.049
0.011	-0.005			19.751	0.4008	25.5023								0.1582	0.057
0.01	-0.0058			19.751	0.4168	27.3178								0.1743	0.055
0.01	-0.005			19.751	0.4333	29.3213			MAX LOAD(KN)	@ DISPLACEMENT(mm)				0.19	0.06
0.014	-0.005			19.751	0.4493	31.2855			177.79	4.0869				0.21	0.061
0.011	-0.005			19.751	0.4645	33.2767			delta ultimate	8.8698				0.2251	0.069
-0.011	-0.015			19.751	0.4801	35.3056								0.241	0.066
-0.034	-0.0388			19.751	0.4999	37.933								0.2576	0.08
-0.038	-0.0548			19.751	0.5158	40.0597								0.2737	0.087
-0.038	-0.07			19.751	0.5324	42.2396								0.2897	0.088
-0.041	-0.0859			19.751	0.5484	44.441								0.305	0.104
-0.04	-0.1023			19.751	0.5645	46.6633								0.3204	0.124
-0.05	-0.1219			19.751	0.5795	48.9171								0.34	0.173
-0.049	-0.1416			19.751	0.5954	51.1663								0.3571	0.164
-0.057	-0.1582			19.751	0.6119	53.4456								0.3732	0.163
-0.055	-0.1743			19.751	0.6318	56.274								0.3893	0.166
-0.06	-0.19			19.751	0.648	58.5309								0.405	0.169
-0.061	-0.21			19.751	0.6641	60.774								0.4202	0.167
-0.069	-0.2251			19.751	0.6752	62.4324								0.4367	0.169
-0.066	-0.241			19.751	0.692	64.6461								0.4528	0.174
-0.08	-0.2576			19.751	0.7044	66.2653								0.4765	0.175
-0.087	-0.2737			19.751	0.7197	68.345								0.4926	0.187
-0.088	-0.2897			19.751	0.7361	70.3285								0.5087	0.186
-0.104	-0.305			19.751	0.7528	72.325								0.52	0.186
-0.124	-0.3204			19.751	0.7689	74.2992								0.5362	0.181
-0.173	-0.34			19.751	0.7802	75.7651								0.5524	0.181
-0.164	-0.3571			19.751	0.7964	77.6515								0.5684	0.175
-0.163	-0.3732			19.751	0.8133	79.4917								0.5843	0.175
-0.166	-0.3893			19.751	0.8295	81.271								0.6042	0.189
-0.169	-0.405			19.751	0.8449	82.961								0.62	0.191
-0.167	-0.4202			19.751	0.8619	84.3775								0.6357	0.194
-0.169	-0.4367			19.751	0.8782	85.6947								0.6518	0.201
-0.174	-0.4528			19.751	0.8981	87.0496								0.6679	0.193
-0.175	-0.4765			19.751	0.9144	88.8782								0.6839	0.193
-0.187	-0.4926			19.751	0.9295	90.3965								0.7	0.194
-0.186	-0.5087			19.751	0.9456	91.8808								0.7154	0.193
-0.186	-0.52			19.751	0.9619	93.2912								0.7353	0.188
-0.181	-0.5362			19.751	0.9781	94.6345								0.7513	0.197
-0.181	-0.5524			19.751	0.9945	95.9201								0.7675	0.195
-0.175	-0.5684			19.751	1.0099	97.1795								0.7835	0.198
-0.175	-0.5843			19.751	1.0297	98.519								0.8	0.197
-0.189	-0.6042			19.751	1.0461	100.17								0.8151	0.192
-0.191	-0.62			19.751	1.0625	101.317								0.8273	0.191
-0.194	-0.6357			19.751	1.0785	102.473								0.8433	0.189
-0.201	-0.6518			19.751	1.0902	103.302								0.8671	0.184
-0.193	-0.6679			19.751	1.1064	104.443								0.8831	0.188
-0.193	-0.6839			19.751	1.1225	105.554								0.8997	0.19
-0.194	-0.7			19.751	1.1386	106.645								0.915	0.193
-0.193	-0.7154			19.751	1.1545	107.544								0.9308	0.19
-0.188	-0.7353			19.751	1.1714	108.248								0.9469	0.2
-0.197	-0.7513			19.751	1.1875	108.958								0.9628	0.198
-0.195	-0.7675			19.751	1.2038	109.68								0.9795	0.195
-0.198	-0.7835			19.751	1.2239	110.524								0.9994	0.188
-0.197	-0.8			19.751	1.2395	111.175								1.015	0.186
-0.192	-0.8151			19.751	1.2521	111.549								1.0305	0.186
-0.191	-0.8273			19.751	1.2689	111.879								1.0465	0.184
-0.189	-0.8433			19.751	1.2845	112.156								1.0625	0.193
-0.184	-0.8671			19.751	1.2996	112.691								1.0791	0.196
-0.188	-0.8831			19.751	1.3152	113.442								1.095	0.192
-0.19	-0.8997			19.751	1.3315	114.356								1.1102	0.194
-0.193	-0.915			19.751	1.3473	115.325								1.1302	0.192
-0.19	-0.9308			19.751	1.3594	116.055								1.1424	0.19
-0.2	-0.9469			19.751	1.3745	117.028								1.155	0.187
-0.198	-0.9628			19.751	1.3991	118.518								1.175	0.19
-0.195	-0.9795			19.751	1.4145	119.487								1.1901	0.186
-0.188	-0.9994			19.751	1.4304	120.513								1.2062	0.187
-0.186	-1.015			19.751	1.4464	121.53								1.2222	0.189
-0.186	-1.0305			19.751	1.4624	122.572								1.2388	0.187
-0.184	-1.0465			19.751	1.4784	123.593								1.25	0.191
-0.193	-1.0625			19.751	1.4945	124.561								1.266	0.187
-0.196	-1.0791			19.751	1.5097	125.585								1.282	0.18
-0.192	-1.095			19.751	1.5295	126.902								1.2987	0.178
-0.194	-1.1102			19.751	1.5455	127.89								1.3149	0.174
-0.192	-1.1302			19.751	1.5611	128.838								1.33	0.178
-0.19	-1.1424			19.751	1.5747	129.467								1.35	0.177
-0.187	-1.155			19.751	1.5907	130.578								1.3659	0.176
-0.19	-1.175			19.751	1.6067	131.737								1.3819	0.178
-0.186	-1.1901			19.751	1.6227	132.806								1.3985	0.181
-0.187	-1.2062			19.751	1.6376	133.6								1.4147	0.181
-0.189	-1.2222			19.751	1.6549	134.556								1.43	0.186
-0.187	-1.2388			19.751	1.6716	135.736								1.4458	0.191
-0.191	-1.25			19.751	1.6889	136.94								1.4584	0.185
-0.187	-1.266			19.751	1.7053	137.913								1.4745	0.195
-0.18	-1.282			19.751	1.7183	138.668								1.49	0.224
-0.178	-1.2987			19.751	1.7345	139.572								1.5055	0.385
-0.174	-1.3149			19.751	1.7513	140.344								1.525	0.875
-0.178	-1.33			19.751	1.7673	141.155								1.5407	1.412
-0.177	-1.35			19.751	1.7833	141.985								1.5572	2.069
-0.176	-1.3659			19.751	1.799	142.815								1.5734	2.729
-0.178	-1.3819			19.751	1.8145	143.649								1.5895	3.441
-0.181	-1.3985			19.751	1.8345	144.675								1.605	4.188
-0.181	-1.4147			19.751	1.85	145.473								1.6203	4.974
-0.186	-1.43			19.751	1.8659	146.255								1.6368	5.852
-0.191	-1.4458			19.751	1.8821	147.025								1.6567	7.01
-0.185	-1.4584			19.751	1.898	147.798								1.669	7.743
-0.195	-1.4745			19.751	1.9145	148.545								1.6888	9.083
-0.224	-1.49			19.751	1.9296	149.286								1.7045	10.227
-0.385	-1.5055			19.751	1.9459	149.961								1.72	11.479
-0.875	-1.525			19.751	1.966	150.737								1.7358	12.833
-1.412	-1.5407			19.751	1.9823	151.329								1.7518	14.305
-2.069	-1.5572			19.751	1.9985	151.934								1.7678	15.85
-2.729	-1.5734			19.751	2.0145	152.524								1.7876	17.935
-3.441	-1.5895			19.751	2.0274	153.035								1.8035	19.691
-4.188	-1.605			19.751	2.0445	153.651								1.82	21.5
-4.974	-1.6203			19.751	2.0604	154.138								1.835	23.443
-5.852	-1.6368			19.751	2.0767	154.527								1.8508	25.451
-7.01	-1.6567			19.751	2.0935	155								1.8667	27.536
-7.743	-1.669			19.751	2.1095	155.504								1.8826	29.707
-9.083	-1.6888			19.751	2.125	155.879								1.9063	33.108
-10.227	-1.7045			19.751	2.1373	156.258								1.9223	35.465
-11.479	-1.72			19.751	2.1618	156.608								1.9388	38.066
-12.833	-1.7358			19.751	2.1745	156.731								1.9548	40.616
-14.305	-1.7518			19.751	2.1896	156.934								1.97	43.201
-15.85	-1.7678			19.751	2.2019	157.152								1.9856	45.835
-17.935	-1.7876			19.751	2.2142	157.34								2.0054	49.246
-19.691	-1.8035			19.751	2.2295	157.699								2.0213	52.007
-21.5	-1.82			19.751	2.2414	158.008								2.0379	54.837
-23.443	-1.835			19.751	2.2573	158.412								2.0539	57.695
-25.451	-1.8508			19.751	2.2814	158.984								2.07	60.58
-27.536	-1.8667			19.751	2.294	159.27								2.085	63.506
-29.707	-1.8826			19.751	2.3095	159.646								2.1009	66.426
-33.108	-1.9063			19.751	2.3213	159.932								2.1174	69.385
-35.465	-1.9223			19.751	2.3373	160.284								2.1373	73.057
-38.066	-1.9388			19.751	2.3495	160.548								2.1535	75.987
-40.616	-1.9548			19.751	2.3653	160.867								2.1696	78.899
-43.201	-1.97			19.751	2.3775	161.084								2.1807	81.052
-45.835	-1.9856			19.751	2.3895	161.293								2.1975	83.926
-49.246	-2.0054			19.751	2.4054	161.584								2.2099	86.028
-52.007	-2.0213			19.751	2.4176	161.793								2.2252	88.728
-54.837	-2.0379			19.751	2.4295	162.007								2.2416	91.303
-57.695	-2.0539			19.751	2.4453	162.296								2.2583	93.895
-60.58	-2.07			19.751	2.4615	162.587								2.2744	96.458
-63.506	-2.085			19.751	2.4775	162.852								2.2857	98.361
-66.426	-2.1009			19.751	2.4975	163.184								2.3019	100.81
-69.385	-2.1174			19.751	2.5141	163.442								2.3188	103.199
-73.057	-2.1373			19.751	2.5295	163.723								2.335	105.509
-75.987	-2.1535			19.751	2.5453	164.03								2.3504	107.703
-78.899	-2.1696			19.751	2.5614	164.327								2.3674	109.542
-81.052	-2.1807			19.751	2.5773	164.624								2.3837	111.252
-83.926	-2.1975			19.751	2.594	164.901								2.4036	113.011
-86.028	-2.2099			19.751	2.6095	165.162								2.4199	115.385
-88.728	-2.2252			19.751	2.6295	165.484								2.435	117.356
-91.303	-2.2416			19.751	2.6453	165.745								2.4511	119.283
-93.895	-2.2583			19.751	2.6615	165.994								2.4674	121.114
-96.458	-2.2744			19.751	2.6776	166.231								2.4836	122.858
-98.361	-2.2857			19.751	2.6941	166.468								2.5	124.527
-100.81	-2.3019			19.751	2.7095	166.706								2.5154	126.162
-103.199	-2.3188			19.751	2.7253	166.954								2.5352	127.901
-105.509	-2.335			19.751	2.7415	167.19								2.5516	130.044
-107.703	-2.3504			19.751	2.7574	167.439								2.568	131.533
-109.542	-2.3674			19.751	2.7695	167.644								2.584	133.034
-111.252	-2.3837			19.751	2.7853	167.915								2.5957	134.111
-113.011	-2.4036			19.751	2.8053	168.23								2.6119	135.592
-115.385	-2.4199			19.751	2.8214	168.479								2.628	137.034
-117.356	-2.435			19.751	2.8374	168.695								2.6441	138.45
-119.283	-2.4511			19.751	2.8541	168.94								2.66	139.617
-121.114	-2.4674			19.751	2.8695	169.199								2.6769	140.532
-122.858	-2.4836			19.751	2.8853	169.451								2.693	141.453
-124.527	-2.5			19.751	2.9014	169.262								2.7093	142.39
-126.162	-2.5154			19.751	2.9171	169.317								2.7294	143.486
-127.901	-2.5352			19.751	2.9372	169.567								2.745	144.331
-130.044	-2.5516			19.751	2.9539	169.803								2.7576	144.817
-131.533	-2.568			19.751	2.9652	169.946								2.7744	145.246
-133.034	-2.584			19.751	2.9815	170.172								2.79	145.605
-134.111	-2.5957			19.751	2.9974	170.41								2.8051	146.299
-135.592	-2.6119			19.751	3.0142	170.658								2.8207	147.275
-137.034	-2.628			19.751	3.0295	170.907								2.837	148.461
-138.45	-2.6441			19.751	3.0453	171.144								2.8528	149.719
-139.617	-2.66			19.751	3.0615	171.334								2.8649	150.667
-140.532	-2.6769			19.751	3.0775	171.523								2.88	151.93
-141.453	-2.693			19.751	3.0942	171.651								2.9046	153.864
-142.39	-2.7093			19.751	3.1142	171.848								2.92	155.123
-143.486	-2.7294			19.751	3.1295	171.988								2.9359	156.455
-144.331	-2.745			19.751	3.1454	172.197								2.9519	157.775
-144.817	-2.7576			19.751	3.1615	172.382								2.9679	159.128
-145.246	-2.7744			19.751	3.1741	172.532								2.9839	160.453
-145.605	-2.79			19.751	3.1895	172.685								3	161.71
-146.299	-2.8051			19.751	3.2053	172.876								3.0152	163.039
-147.275	-2.8207			19.751	3.2215	173.019								3.035	164.749
-148.461	-2.837			19.751	3.2375	173.18								3.051	166.031
-149.719	-2.8528			19.751	3.2541	173.303								3.0666	167.262
-150.667	-2.8649			19.751	3.2695	173.454								3.0802	168.079
-151.93	-2.88			19.751	3.2895	173.634								3.0962	169.521
-153.864	-2.9046			19.751	3.3053	173.8								3.1122	171.026
-155.123	-2.92			19.751	3.3175	173.925								3.1282	172.413
-156.455	-2.9359			19.751	3.3342	174.02								3.1431	173.444
-157.775	-2.9519			19.751	3.3495	174.182								3.1604	174.686
-159.128	-2.9679			19.751	3.3653	174.335								3.1771	176.218
-160.453	-2.9839			19.751	3.3774	174.454								3.1944	177.781
-161.71	-3			19.751	3.3941	174.608								3.2108	179.044
-163.039	-3.0152			19.751	3.4095	174.695								3.2238	180.024
-164.749	-3.035			19.751	3.4216	174.791								3.24	181.197
-166.031	-3.051			19.751	3.4376	174.905								3.2568	182.2
-167.262	-3.0666			19.751	3.4543	175.003								3.2728	183.252
-168.079	-3.0802			19.751	3.4695	175.138								3.2888	184.33
-169.521	-3.0962			19.751	3.4816	175.254								3.3045	185.408
-171.026	-3.1122			19.751	3.4976	175.365								3.32	186.491
-172.413	-3.1282			19.751	3.5142	175.53								3.34	187.823
-173.444	-3.1431			19.751	3.5295	175.672								3.3555	188.858
-174.686	-3.1604			19.751	3.5455	175.834								3.3714	189.874
-176.218	-3.1771			19.751	3.5617	175.985								3.3876	190.873
-177.781	-3.1944			19.751	3.5776	176.102								3.4035	191.877
-179.044	-3.2108			19.751	3.5977	176.267								3.42	192.847
-180.024	-3.2238			19.751	3.6143	176.372								3.4351	193.808
-181.197	-3.24			19.751	3.6295	176.519								3.4514	194.685
-182.2	-3.2568			19.751	3.6456	176.66								3.4715	195.692
-183.252	-3.2728			19.751	3.6618	176.769								3.4878	196.461
-184.33	-3.2888			19.751	3.6778	176.895								3.504	197.246
-185.408	-3.3045			19.751	3.6944	176.993								3.52	198.012
-186.491	-3.32			19.751	3.7095	177.082								3.5329	198.676
-187.823	-3.34			19.751	3.7295	177.203								3.55	199.475
-188.858	-3.3555			19.751	3.7456	177.337								3.5659	200.108
-189.874	-3.3714			19.751	3.7619	177.419								3.5822	200.613
-190.873	-3.3876			19.751	3.7779	177.525								3.599	201.227
-191.877	-3.4035			19.751	3.7896	177.585								3.615	201.881
-192.847	-3.42			19.751	3.8058	177.662								3.6305	202.368
-193.808	-3.4351			19.751	3.8221	177.702								3.6428	202.86
-194.685	-3.4514			19.751	3.8381	177.713								3.6673	203.314
-195.692	-3.4715			19.751	3.8545	177.713								3.68	203.474
-196.461	-3.4878			19.751	3.8699	177.708								3.6951	203.738
-197.246	-3.504			19.751	3.8862	177.706								3.7074	204.021
-198.012	-3.52			19.751	3.9061	177.716								3.7197	204.265
-198.676	-3.5329			19.751	3.9223	177.755								3.735	204.73
-199.475	-3.55			19.751	3.9383	177.744								3.7469	205.132
-200.108	-3.5659			19.751	3.9545	177.711								3.7628	205.656
-200.613	-3.5822			19.751	3.9701	177.678								3.7869	206.399
-201.227	-3.599			19.751	3.9863	177.652								3.7995	206.77
-201.881	-3.615			19.751	4.0025	177.648								3.815	207.258
-202.368	-3.6305			19.751	4.0184	177.653								3.8268	207.63
-202.86	-3.6428			19.751	4.0345	177.664								3.8428	208.086
-203.314	-3.6673			19.751	4.0545	177.697								3.855	208.429
-203.474	-3.68			19.751	4.0703	177.756								3.8708	208.843
-203.738	-3.6951			19.751	4.0869	177.79								3.883	209.125
-204.021	-3.7074			19.751	4.0993	177.755								3.895	209.396
-204.265	-3.7197			19.751	4.1145	177.632								3.9109	209.774
-204.73	-3.735			19.751	4.1301	177.611								3.9231	210.046
-205.132	-3.7469			19.751	4.1463	177.638								3.935	210.324
-205.656	-3.7628			19.751	4.1625	177.673								3.9508	210.699
-206.399	-3.7869			19.751	4.1785	177.638								3.967	211.076
-206.77	-3.7995			19.751	4.1945	177.617								3.983	211.42
-207.258	-3.815			19.751	4.21	177.615								4.003	211.851
-207.63	-3.8268			19.751	4.23	177.578								4.0196	212.186
-208.086	-3.8428			19.751	4.2463	177.535								4.035	212.551
-208.429	-3.855			19.751	4.2627	177.427								4.0508	212.95
-208.843	-3.8708			19.751	4.2786	177.312								4.0669	213.335
-209.125	-3.883			19.751	4.2945	177.203								4.0828	213.721
-209.396	-3.895			19.751	4.3064	177.153								4.0995	214.08
-209.774	-3.9109			19.751	4.3227	177.079								4.115	214.419
-210.046	-3.9231			19.751	4.3387	177.016								4.135	214.837
-210.324	-3.935			19.751	4.3545	176.944								4.1508	215.176
-210.699	-3.9508			19.751	4.3702	176.891								4.167	215.5
-211.076	-3.967			19.751	4.3864	176.875								4.1831	215.807
-211.42	-3.983			19.751	4.4064	176.831								4.1996	216.115
-211.851	-4.003			19.751	4.4226	176.8								4.215	216.424
-212.186	-4.0196			19.751	4.4385	176.721								4.2308	216.746
-212.551	-4.035			19.751	4.4545	176.728								4.247	217.052
-212.95	-4.0508			19.751	4.471	176.669								4.2629	217.376
-213.335	-4.0669			19.751	4.4873	176.564								4.275	217.641
-213.721	-4.0828			19.751	4.5034	176.476								4.2908	217.993
-214.08	-4.0995			19.751	4.5194	176.389								4.3108	218.402
-214.419	-4.115			19.751	4.5394	176.308								4.3269	218.725
-214.837	-4.135			19.751	4.5545	176.157								4.3429	219.006
-215.176	-4.1508			19.751	4.571	176.02								4.3596	219.324
-215.5	-4.167			19.751	4.5869	175.783								4.375	219.66
-215.807	-4.1831			19.751	4.603	175.6								4.3908	219.988
-216.115	-4.1996			19.751	4.6145	175.446								4.4069	219.742
-216.424	-4.215			19.751	4.6304	175.248								4.4226	219.814
-216.746	-4.2308			19.751	4.6467	175.045								4.4427	220.138
-217.052	-4.247			19.751	4.663	174.829								4.4594	220.445
-217.376	-4.2629			19.751	4.6793	174.645								4.4707	220.63
-217.641	-4.275			19.751	4.6948	174.393								4.487	220.924
-217.993	-4.2908			19.751	4.7151	173.977								4.5029	221.232
-218.402	-4.3108			19.751	4.7319	173.571								4.5197	221.555
-218.725	-4.3269			19.751	4.7483	173.062								4.535	221.878
-219.006	-4.3429			19.751	4.7645	172.597								4.5508	222.185
-219.324	-4.3596			19.751	4.7795	172.219								4.567	222.432
-219.66	-4.375			19.751	4.7956	171.803								4.583	222.677
-219.988	-4.3908			19.751	4.8123	171.302								4.5997	222.844
-219.742	-4.4069			19.751	4.8288	170.736								4.6197	223.1
-219.814	-4.4226			19.751	4.8401	170.229								4.635	223.281
-220.138	-4.4427			19.751	4.8562	169.548								4.6509	223.553
-220.445	-4.4594			19.751	4.8731	168.829								4.667	223.793
-220.63	-4.4707			19.751	4.8931	167.95								4.6796	223.987
-220.924	-4.487			19.751	4.9093	167.327								4.695	224.186
-221.232	-4.5029			19.751	4.9245	166.696								4.7108	224.434
-221.555	-4.5197			19.751	4.9407	165.9								4.727	224.619
-221.878	-4.535			19.751	4.9578	164.558								4.743	224.829
-222.185	-4.5508			19.751	4.9745	163.112								4.7596	224.988
-222.432	-4.567			19.751	4.9895	161.762								4.775	225.185
-222.677	-4.583			19.751	5.0058	160.357								4.795	225.418
-222.844	-4.5997			19.751	5.0258	158.624								4.8108	225.633
-223.1	-4.6197			19.751	5.0419	157.033								4.823	225.796
-223.281	-4.635			19.751	5.0577	155.457								4.8397	225.919
-223.553	-4.6509			19.751	5.0745	154.266								4.855	226.129
-223.793	-4.667			19.751	5.0896	153.034								4.8708	226.328
-223.987	-4.6796			19.751	5.1057	151.858								4.8829	226.482
-224.186	-4.695			19.751	5.1229	150.375								4.8996	226.682
-224.434	-4.7108			19.751	5.1395	148.802								4.915	226.796
-224.619	-4.727			19.751	5.151	146.96								4.9271	226.92
-224.829	-4.743			19.751	5.1667	145.48								4.9431	227.068
-224.988	-4.7596			19.751	5.1828	144.055								4.9598	227.195
-225.185	-4.775			19.751	5.2025	142.499								4.975	227.37
-225.418	-4.795			19.751	5.2181	141.497								4.9871	227.521
-225.633	-4.8108			19.751	5.2343	140.728								5.0031	227.665
-225.796	-4.823			19.751	5.2495	139.96								5.0197	227.879
-225.919	-4.8397			19.751	5.2651	139.36								5.035	228.064
-226.129	-4.855			19.751	5.2808	138.961								5.051	228.274
-226.328	-4.8708			19.751	5.2964	138.663								5.0672	228.47
-226.482	-4.8829			19.751	5.3125	138.392								5.0831	228.622
-226.682	-4.8996			19.751	5.3319	138.138								5.1032	228.836
-226.796	-4.915			19.751	5.348	137.957								5.1198	228.973
-226.92	-4.9271			19.751	5.3641	137.881								5.135	229.164
-227.068	-4.9431			19.751	5.3795	137.839								5.1511	229.347
-227.195	-4.9598			19.751	5.395	137.74								5.1673	229.488
-227.37	-4.975			19.751	5.4116	137.679								5.1833	229.651
-227.521	-4.9871			19.751	5.4278	137.582								5.1999	229.779
-227.665	-5.0031			19.751	5.4395	137.453								5.215	229.895
-227.879	-5.0197			19.751	5.4259	125.552								5.235	230.052
-228.064	-5.035			19.751	5.4738	115.582								5.2511	230.225
-228.274	-5.051			19.751	5.4882	109.482								5.2674	230.332
-228.47	-5.0672			19.751	5.5188	105.194								5.2834	230.469
-228.622	-5.0831			19.751	5.5264	103.052								5.2951	230.548
-228.836	-5.1032			19.751	5.5445	101.373								5.3113	230.647
-228.973	-5.1198			19.751	5.5555	100.364								5.3276	230.699
-229.164	-5.135			19.751	5.5695	99.3987								5.3436	230.714
-229.347	-5.1511			19.751	5.5889	98.2032								5.36	230.714
-229.488	-5.1673			19.751	5.6021	97.2172								5.3754	230.707
-229.651	-5.1833			19.751	5.622	96.2313								5.3917	230.705
-229.779	-5.1999			19.751	5.6395	94.928								5.4116	230.718
-229.895	-5.215			19.751	5.6548	93.8789								5.4278	230.768
-230.052	-5.235			19.751	5.6726	92.896								5.4438	230.754
-230.225	-5.2511			19.751	5.6883	91.9524								5.46	230.711
-230.332	-5.2674			19.751	5.7045	91.0435								5.4756	230.668
-230.469	-5.2834			19.751	5.7199	90.2832								5.4918	230.634
-230.548	-5.2951			19.751	5.7364	89.6115								5.508	230.629
-230.647	-5.3113			19.751	5.7493	89.1663								5.5239	230.636
-230.699	-5.3276			19.751	5.7645	88.6333								5.54	230.65
-230.714	-5.3436			19.751	5.7808	88.165								5.56	230.693
-230.714	-5.36			19.751	5.7968	87.6697								5.5758	230.769
-230.707	-5.3754			19.751	5.8169	86.9888								5.5924	230.814
-230.705	-5.3917			19.751	5.8331	86.3386								5.6048	230.768
-230.718	-5.4116			19.751	5.8495	85.7494								5.62	230.608
-230.768	-5.4278			19.751	5.8649	85.1748								5.6356	230.581
-230.754	-5.4438			19.751	5.881	84.6217								5.6518	230.616
-230.711	-5.46			19.751	5.8971	84.1033								5.668	230.662
-230.668	-5.4756			19.751	5.9137	83.521								5.684	230.616
-230.634	-5.4918			19.751	5.9295	82.9671								5.7	230.589
-230.629	-5.508			19.751	5.9495	82.4125								5.7155	230.586
-230.636	-5.5239			19.751	5.965	82.0005								5.7355	230.538
-230.65	-5.54			19.751	5.9811	81.5206								5.7518	230.483
-230.693	-5.56			19.751	5.997	81.0646								5.7682	230.342
-230.769	-5.5758			19.751	6.0138	80.5354								5.7841	230.193
-230.814	-5.5924			19.751	6.0295	80.0463								5.8	230.052
-230.768	-5.6048			19.751	6.0452	79.5256								5.8119	229.987
-230.608	-5.62			19.751	6.0572	79.1404								5.8282	229.89
-230.581	-5.6356			19.751	6.0739	78.6752								5.8442	229.809
-230.616	-5.6518			19.751	6.0895	78.297								5.86	229.715
-230.662	-5.668			19.751	6.1048	77.8448								5.8757	229.646
-230.616	-5.684			19.751	6.1245	77.2702								5.8919	229.625
-230.589	-5.7			19.751	6.1401	76.7857								5.9119	229.569
-230.586	-5.7155			19.751	6.1561	76.3875								5.9281	229.528
-230.538	-5.7355			19.751	6.1726	76.0894								5.944	229.426
-230.483	-5.7518			19.751	6.1889	75.8367								5.96	229.435
-230.342	-5.7682			19.751	6.2045	75.5278								5.9765	229.358
-230.193	-5.7841			19.751	6.22	75.2336								5.9928	229.222
-230.052	-5.8			19.751	6.2357	74.9216								6.0089	229.107
-229.987	-5.8119			19.751	6.2555	74.5218								6.0249	228.995
-229.89	-5.8282			19.751	6.2721	74.1891								6.0449	228.89
-229.809	-5.8442			19.751	6.2885	73.854								6.06	228.694
-229.715	-5.86			19.751	6.3043	73.3556								6.0765	228.515
-229.646	-5.8757			19.751	6.3195	72.905								6.0924	228.208
-229.625	-5.8919			19.751	6.3355	72.4968								6.1085	227.971
-229.569	-5.9119			19.751	6.3522	72.1864								6.12	227.77
-229.528	-5.9281			19.751	6.3684	71.9476								6.1359	227.514
-229.426	-5.944			19.751	6.3797	71.7673								6.1522	227.25
-229.435	-5.96			19.751	6.3954	71.5162								6.1685	226.97
-229.358	-5.9765			19.751	6.412	71.3653								6.1848	226.73
-229.222	-5.9928			19.751	6.432	71.2251								6.2003	226.404
-229.107	-6.0089			19.751	6.4481	71.0194								6.2206	225.863
-228.995	-6.0249			19.751	6.4643	70.776								6.2374	225.336
-228.89	-6.0449			19.751	6.4795	70.5426								6.2538	224.676
-228.694	-6.06			19.751	6.4954	70.3308								6.27	224.072
-228.515	-6.0765			19.751	6.512	70.0958								6.285	223.581
-228.208	-6.0924			19.751	6.5284	69.8663								6.3011	223.041
-227.971	-6.1085			19.751	6.5445	69.5913								6.3178	222.391
-227.77	-6.12			19.751	6.5645	69.3718								6.3343	221.656
-227.514	-6.1359			19.751	6.5759	69.1861								6.3456	220.997
-227.25	-6.1522			19.751	6.5888	69.0175								6.3617	220.114
-226.97	-6.1685			19.751	6.609	68.781								6.3786	219.18
-226.73	-6.1848			19.751	6.6245	68.2025								6.3986	218.039
-226.404	-6.2003			19.751	6.6395	67.2142								6.4148	217.23
-225.863	-6.2206			19.751	6.6545	65.733								6.43	216.411
-225.336	-6.2374			19.751	6.6695	64.1062								6.4462	215.378
-224.676	-6.2538			19.751	6.6845	62.1797								6.4633	213.635
-224.072	-6.27			19.751	6.7007	60.5098								6.48	211.758
-223.581	-6.285			19.751	6.7145	57.2854								6.495	210.005
-223.041	-6.3011			19.751	6.7229	46.3675								6.5113	208.181
-222.391	-6.3178			19.751	6.743	45.0542								6.5313	205.931
-221.656	-6.3343			19.751	6.7595	42.8828								6.5474	203.866
-220.997	-6.3456			19.751	6.7758	40.8423								6.5632	201.82
-220.114	-6.3617			19.751	6.7945	38.8565								6.58	200.274
-219.18	-6.3786			19.751	6.8095	38.0539								6.5951	198.674
-218.039	-6.3986			19.751	6.8257	37.4462								6.6112	197.148
-217.23	-6.4148			19.751	6.8423	36.9031								6.6284	195.223
-216.411	-6.43			19.751	6.8597	36.1128								6.645	193.18
-215.378	-6.4462			19.751	6.877	35.6853								6.6565	190.789
-213.635	-6.4633			19.751	6.8945	35.3402								6.6722	188.868
-211.758	-6.48			19.751	6.9061	34.8349								6.6883	187.017
-210.005	-6.495			19.751	6.9228	33.9252								6.708	184.997
-208.181	-6.5113			19.751	6.9393	32.7983								6.7236	183.697
-205.931	-6.5313			19.751	6.9545	31.7038								6.7398	182.698
-203.866	-6.5474			19.751	6.9749	30.5407								6.755	181.701
-201.82	-6.5632			19.751	6.9916	29.7265								6.7706	180.922
-200.274	-6.58			19.751	7.0085	29.2951								6.7863	180.404
-198.674	-6.5951			19.751	7.0245	28.903								6.8019	180.018
-197.148	-6.6112			19.751	7.0403	28.4278								6.818	179.665
-195.223	-6.6284			19.751	7.0565	28.0557								6.8374	179.336
-193.18	-6.645			19.751	7.0724	27.8016								6.8535	179.101
-190.789	-6.6565			19.751	7.0889	27.4518								6.8696	179.002
-188.868	-6.6722			19.751	7.1045	27.163								6.885	178.948
-187.017	-6.6883			19.751	7.1162	26.9858								6.9005	178.819
-184.997	-6.708			19.751	7.1325	26.7956								6.9171	178.74
-183.697	-6.7236			19.751	7.1527	26.6623								6.9333	178.614
-182.698	-6.7398			19.751	7.1694	26.6669								6.945	178.446
-181.701	-6.755			19.751	7.1845	26.6577								6.9314	162.996
-180.922	-6.7706			19.751	7.2005	26.6084								6.9793	150.053
-180.404	-6.7863			19.751	7.2165	26.5576								6.9937	142.134
-180.018	-6.8019			19.751	7.233	26.4251								7.0243	136.567
-179.665	-6.818			19.751	7.2492	26.0792								7.0319	133.786
-179.336	-6.8374			19.751	7.2645	25.8127								7.05	131.606
-179.101	-6.8535			19.751	7.2768	25.4869								7.061	130.296
-179.002	-6.8696			19.751	7.2939	25.4137								7.075	129.043
-178.948	-6.885			19.751	7.3095	25.349								7.0944	127.491
-178.819	-6.9005			19.751	7.3211	25.2781								7.1076	126.211
-178.74	-6.9171			19.751	7.337	25.1826								7.1275	124.931
-178.614	-6.9333			19.751	7.3534	24.8676								7.145	123.239
-178.446	-6.945			19.751	7.3738	24.685								7.1603	121.877
-162.996	-6.9314			19.751	7.3895	24.4794								7.1781	120.601
-150.053	-6.9793			19.751	7.4053	24.2783								7.1938	119.376
-142.134	-6.9937			19.751	7.4217	24.078								7.21	118.196
-136.567	-7.0243			19.751	7.4376	23.9047								7.2254	117.209
-133.786	-7.0319			19.751	7.4541	23.8762								7.2419	116.337
-131.606	-7.05			19.751	7.4695	23.8993								7.2548	115.759
-130.296	-7.061			19.751	7.4846	23.9178								7.27	115.067
-129.043	-7.075			19.751	7.4968	23.964								7.2863	114.459
-127.491	-7.0944			19.751	7.5132	23.9972								7.3023	113.816
-126.211	-7.1076			19.751	7.5295	24.078								7.3224	112.932
-124.931	-7.1275			19.751	7.5493	24.1189								7.3386	112.088
-123.239	-7.145			19.751	7.5645	24.1528								7.355	111.323
-121.877	-7.1603			19.751	7.5806	24.1366								7.3704	110.577
-120.601	-7.1781			19.751	7.5965	24.0665								7.3865	109.859
-119.376	-7.1938			19.751	7.613	24.0326								7.4026	109.186
-118.196	-7.21			19.751	7.6295	24.0811								7.4192	108.43
-117.209	-7.2254			19.751	7.6407	24.0981								7.435	107.711
-116.337	-7.2419			19.751	7.6565	24.1273								7.455	106.991
-115.759	-7.2548			19.751	7.673	24.1019								7.4705	106.456
-115.067	-7.27			19.751	7.6892	23.8778								7.4866	105.833
-114.459	-7.2863			19.751	7.7045	23.7176								7.5025	105.241
-113.816	-7.3023			19.751	7.7245	23.5181								7.5193	104.554
-112.932	-7.3224			19.751	7.741	23.3763								7.535	103.919
-112.088	-7.3386			19.751	7.7566	23.0574								7.5507	103.243
-111.323	-7.355			19.751	7.7735	22.9018								7.5627	102.743
-110.577	-7.3704			19.751	7.7895	22.8587								7.5794	102.139
-109.859	-7.3865			19.751	7.8012	22.891								7.595	101.648
-109.186	-7.4026			19.751	7.8171	22.9288								7.6103	101.061
-108.43	-7.4192			19.751	7.8295	22.8864								7.63	100.315
-107.711	-7.435			19.751	7.8448	22.8533								7.6456	99.686
-106.991	-7.455			19.751	7.8569	22.8148								7.6616	99.169
-106.456	-7.4705			19.751	7.8734	22.7717								7.6781	98.782
-105.833	-7.4866			19.751	7.8895	22.7046								7.6944	98.454
-105.241	-7.5025			19.751	7.9046	22.7247								7.71	98.053
-104.554	-7.5193			19.751	7.9207	22.6846								7.7255	97.671
-103.919	-7.535			19.751	7.9334	22.6808								7.7412	97.266
-103.243	-7.5507			19.751	7.9495	22.6392								7.761	96.747
-102.743	-7.5627			19.751	7.9615	22.6091								7.7776	96.315
-102.139	-7.5794			19.751	7.9774	22.5914								7.794	95.88
-101.648	-7.595			19.751	7.9937	22.6284								7.8098	95.233
-101.061	-7.6103			19.751	8.0095	22.6785								7.825	94.648
-100.315	-7.63			19.751	8.0247	22.69								7.841	94.118
-99.686	-7.6456			19.751	8.0369	22.7085								7.8577	93.715
-99.169	-7.6616			19.751	8.0536	22.7177								7.8739	93.405
-98.782	-7.6781			19.751	8.0649	22.7316								7.8852	93.171
-98.454	-7.6944			19.751	8.0811	22.68								7.9009	92.845
-98.053	-7.71			19.751	8.0971	22.6538								7.9175	92.649
-97.671	-7.7255			19.751	8.114	22.5806								7.9375	92.467
-97.266	-7.7412			19.751	8.1295	22.4035								7.9536	92.2
-96.747	-7.761			19.751	8.1453	22.3164								7.9698	91.884
-96.315	-7.7776			19.751	8.1574	22.197								7.985	91.581
-95.88	-7.794			19.751	8.1695	22.1616								8.0009	91.306
-95.233	-7.8098			19.751	8.185	22.0669								8.0175	91.001
-94.648	-7.825			19.751	8.2012	22.0607								8.0339	90.703
-94.118	-7.841			19.751	8.2172	22.0229								8.05	90.346
-93.715	-7.8577			19.751	8.2336	22.0099								8.07	90.061
-93.405	-7.8739			19.751	8.2494	22.0592								8.0814	89.82
-93.171	-7.8852			19.751	8.2608	22.0037								8.0943	89.601
-92.845	-7.9009			19.751	8.2733	21.9575								8.1145	89.294
-92.649	-7.9175			19.751	8.2895	21.9213								8.13	88.543
-92.467	-7.9375			19.751	8.3049	21.6147								8.145	87.26
-92.2	-7.9536			19.751	8.3216	21.4268								8.16	85.337
-91.884	-7.9698			19.751	8.3416	21.3482								8.175	83.225
-91.581	-7.985			19.751	8.354	21.3235								8.19	80.724
-91.306	-8.0009			19.751	8.3652	21.2565								8.2062	78.556
-91.001	-8.0175			19.751	8.3812	21.0116								8.22	74.37
-90.703	-8.0339			19.751	8.3938	20.8606								8.2284	60.196
-90.346	-8.05			19.751	8.4095	20.7289								8.2485	58.491
-90.061	-8.07			19.751	8.4295	20.628								8.265	55.672
-89.82	-8.0814			19.751	8.4451	20.5764								8.2813	53.023
-89.601	-8.0943			19.751	8.4614	20.4562								8.3	50.445
-89.294	-8.1145			19.751	8.4776	20.3414								8.315	49.403
-88.543	-8.13			19.751	8.4941	20.1573								8.3312	48.614
-87.26	-8.145			19.751	8.5095	19.9679								8.3478	47.909
-85.337	-8.16			19.751	8.5259	19.7352								8.3652	46.883
-83.225	-8.175			19.751	8.5421	19.5958								8.3825	46.328
-80.724	-8.19			19.751	8.5545	19.508								8.4	45.88
-78.556	-8.2062			19.751	8.5655	19.4394								8.4116	45.224
-74.37	-8.22			19.751	8.5817	19.4217								8.4283	44.043
-60.196	-8.2284			19.751	8.5939	19.2238								8.4448	42.58
-58.491	-8.2485			19.751	8.6095	19.1544								8.46	41.159
-55.672	-8.265			19.751	8.6251	19.2091								8.4804	39.649
-53.023	-8.2813			19.751	8.6411	19.0528								8.4971	38.592
-50.445	-8.3			19.751	8.6574	18.9003								8.514	38.032
-49.403	-8.315			19.751	8.6695	18.6568								8.53	37.523
-48.614	-8.3312			19.751	8.6858	18.3572								8.5458	36.906
-47.909	-8.3478			19.751	8.6981	18.2663								8.562	36.423
-46.883	-8.3652			19.751	8.7144	18.2209								8.5779	36.093
-46.328	-8.3825			19.751	8.7296	18.2602								8.5944	35.639
-45.88	-8.4			19.751	8.7451	18.2879								8.61	35.264
-45.224	-8.4116			19.751	8.7615	18.2802								8.6217	35.034
-44.043	-8.4283			19.751	8.7776	18.244								8.638	34.787
-42.58	-8.4448			19.751	8.7895	18.1908								8.6582	34.614
-41.159	-8.46			19.751	8.8012	17.9351								8.6749	34.62
-39.649	-8.4804			19.751	8.8174	17.7672								8.69	34.608
-38.592	-8.4971			19.751	8.8344	17.6455								8.706	34.544
-38.032	-8.514			19.751	8.8495	17.5523								8.722	34.478
-37.523	-8.53			19.751	8.8698	17.4344								8.7385	34.306
-36.906	-8.5458			19.751										8.7547	33.857
-36.423	-8.562			19.751										8.77	33.511
-36.093	-8.5779			19.751										8.7823	33.088
-35.639	-8.5944			19.751										8.7994	32.993
-35.264	-8.61			19.751										8.815	32.909
-35.034	-8.6217			19.751										8.8266	32.817
-34.787	-8.638			19.751										8.8425	32.693
-34.614	-8.6582			19.751										8.8589	32.284
-34.62	-8.6749			19.751										8.8793	32.047
-34.608	-8.69			19.751										8.895	31.78
-34.544	-8.706			19.751										8.9108	31.519
-34.478	-8.722			19.751										8.9272	31.259
-34.306	-8.7385			19.751										8.9431	31.034
-33.857	-8.7547			19.751										8.9596	30.997
-33.511	-8.77			19.751										8.975	31.027
-33.088	-8.7823			19.751										8.9901	31.051
-32.993	-8.7994			19.751										9.0023	31.111
-32.909	-8.815			19.751										9.0187	31.154
-32.817	-8.8266			19.751										9.035	31.259
-32.693	-8.8425			19.751										9.0548	31.312
-32.284	-8.8589			19.751										9.07	31.356
-32.047	-8.8793			19.751										9.0861	31.335
-31.78	-8.895			19.751										9.102	31.244
-31.519	-8.9108			19.751										9.1185	31.2
-31.259	-8.9272			19.751										9.135	31.263
-31.034	-8.9431			19.751										9.1462	31.285
-30.997	-8.9596			19.751										9.162	31.323
-31.027	-8.975			19.751										9.1785	31.29
-31.051	-8.9901			19.751										9.1947	30.999
-31.111	-9.0023			19.751										9.21	30.791
-31.154	-9.0187			19.751										9.23	30.532
-31.259	-9.035			19.751										9.2465	30.348
-31.312	-9.0548			19.751										9.2621	29.934
-31.356	-9.07			19.751										9.279	29.732
-31.335	-9.0861			19.751										9.295	29.676
-31.244	-9.102			19.751										9.3067	29.718
-31.2	-9.1185			19.751										9.3226	29.767
-31.263	-9.135			19.751										9.335	29.712
-31.285	-9.1462			19.751										9.3503	29.669
-31.323	-9.162			19.751										9.3624	29.619
-31.29	-9.1785			19.751										9.3789	29.563
-30.999	-9.1947			19.751										9.395	29.476
-30.791	-9.21			19.751										9.4101	29.502
-30.532	-9.23			19.751										9.4262	29.45
-30.348	-9.2465			19.751										9.4389	29.445
-29.934	-9.2621			19.751										9.455	29.391
-29.732	-9.279			19.751										9.467	29.352
-29.676	-9.295			19.751										9.4829	29.329
-29.718	-9.3067			19.751										9.4992	29.377
-29.767	-9.3226			19.751										9.515	29.442
-29.712	-9.335			19.751										9.5302	29.457
-29.669	-9.3503			19.751										9.5424	29.481
-29.619	-9.3624			19.751										9.5591	29.493
-29.563	-9.3789			19.751										9.5704	29.511
-29.476	-9.395			19.751										9.5866	29.444
-29.502	-9.4101			19.751										9.6026	29.41
-29.45	-9.4262			19.751										9.6195	29.315
-29.445	-9.4389			19.751										9.635	29.085
-29.391	-9.455			19.751										9.6508	28.972
-29.352	-9.467			19.751										9.6629	28.817
-29.329	-9.4829			19.751										9.675	28.771
-29.377	-9.4992			19.751										9.6905	28.648
-29.442	-9.515			19.751										9.7067	28.64
-29.457	-9.5302			19.751										9.7227	28.591
-29.481	-9.5424			19.751										9.7391	28.574
-29.493	-9.5591			19.751										9.7549	28.638
-29.511	-9.5704			19.751										9.7663	28.566
-29.444	-9.5866			19.751										9.7788	28.506
-29.41	-9.6026			19.751										9.795	28.459
-29.315	-9.6195			19.751										9.8104	28.061
-29.085	-9.635			19.751										9.8271	27.817
-28.972	-9.6508			19.751										9.8471	27.715
-28.817	-9.6629			19.751										9.8595	27.683
-28.771	-9.675			19.751										9.8707	27.596
-28.648	-9.6905			19.751										9.8867	27.278
-28.64	-9.7067			19.751										9.8993	27.082
-28.591	-9.7227			19.751										9.915	26.911
-28.574	-9.7391			19.751										9.935	26.78
-28.638	-9.7549			19.751										9.9506	26.713
-28.566	-9.7663			19.751										9.9669	26.557
-28.506	-9.7788			19.751										9.9831	26.408
-28.459	-9.795			19.751										9.9996	26.169
-28.061	-9.8104			19.751										10.015	25.923
-27.817	-9.8271			19.751										10.0314	25.621
-27.715	-9.8471			19.751										10.0476	25.44
-27.683	-9.8595			19.751										10.06	25.326
-27.596	-9.8707			19.751										10.071	25.237
-27.278	-9.8867			19.751										10.0872	25.214
-27.082	-9.8993			19.751										10.0994	24.957
-26.911	-9.915			19.751										10.115	24.867
-26.78	-9.935			19.751										10.1306	24.938
-26.713	-9.9506			19.751										10.1466	24.735
-26.557	-9.9669			19.751										10.1629	24.537
-26.408	-9.9831			19.751										10.175	24.221
-26.169	-9.9996			19.751										10.1913	23.832
-25.923	-10.015			19.751										10.2036	23.714
-25.621	-10.0314			19.751										10.2199	23.655
-25.44	-10.0476			19.751										10.2351	23.706
-25.326	-10.06			19.751										10.2506	23.742
-25.237	-10.071			19.751										10.267	23.732
-25.214	-10.0872			19.751										10.2831	23.685
-24.957	-10.0994			19.751										10.295	23.616
-24.867	-10.115			19.751										10.3067	23.284
-24.938	-10.1306			19.751										10.3229	23.066
-24.735	-10.1466			19.751										10.3399	22.908
-24.537	-10.1629			19.751										10.355	22.787
-24.221	-10.175			19.751										10.3753	22.634
-23.832	-10.1913			19.751										10.3877	22.321
-23.714	-10.2036			19.751										10.4	22.151
-23.655	-10.2199			19.751										10.415	22.06
-23.706	-10.2351			19.751										10.4272	22.042
-23.742	-10.2506			19.751										10.4431	21.933
-23.732	-10.267			19.751										10.4635	21.63
-23.685	-10.2831			19.751										10.48	21.377
-23.616	-10.295			19.751										10.4917	21.138
-23.284	-10.3067			19.751										10.5115	21.046
-23.066	-10.3229			19.751										10.5275	20.947
-22.908	-10.3399			19.751										10.5431	20.825
-22.787	-10.355			19.751										10.5596	20.764
-22.634	-10.3753			19.751										10.5707	20.737
-22.321	-10.3877			19.751										10.5867	20.719
-22.151	-10.4			19.751										10.6025	20.836
-22.06	-10.415			19.751										10.6261	21.117
-22.042	-10.4272			19.751										10.6385	21.272
-21.933	-10.4431			19.751										10.6547	21.509
-21.63	-10.4635			19.751										10.6658	21.645
-21.377	-10.48			19.751										10.6814	21.221
-21.138	-10.4917			19.751										10.6948	21.221
-21.046	-10.5115			19.751										10.7063	21.27
-20.947	-10.5275			19.751										10.73	21.499
-20.825	-10.5431			19.751										10.7459	21.656
-20.764	-10.5596			19.751										10.762	21.833
-20.737	-10.5707			19.751										10.7784	21.905
-20.719	-10.5867			19.751										10.79	21.895
-20.836	-10.6025			19.751										10.8062	21.944
-21.117	-10.6261			19.751										10.8222	21.989
-21.272	-10.6385			19.751										10.8388	21.995
-21.509	-10.6547			19.751										10.8587	22.051
-21.645	-10.6658			19.751										10.8749	22.197
-21.221	-10.6814			19.751										10.89	22.188
-21.221	-10.6948			19.751										10.9061	22.295
-21.27	-10.7063			19.751										10.922	22.384
-21.499	-10.73			19.751										10.9384	22.468
-21.656	-10.7459			19.751										10.95	22.536
-21.833	-10.762			19.751										10.9659	22.591
-21.905	-10.7784			19.751										10.9819	22.577
-21.895	-10.79			19.751										10.9985	22.579
-21.944	-10.8062			19.751										11.015	22.541
-21.989	-10.8222			19.751										11.0305	22.537
-21.995	-10.8388			19.751										11.0505	22.553
-22.051	-10.8587			19.751										11.0663	22.542
-22.197	-10.8749			19.751										11.0822	22.469
-22.188	-10.89			19.751										11.0989	22.404
-22.295	-10.9061			19.751										11.115	22.471
-22.384	-10.922			19.751										11.1299	22.644
-22.468	-10.9384			19.751										11.1461	22.819
-22.536	-10.95			19.751										11.1619	22.983
-22.591	-10.9659			19.751										11.1748	23.09
-22.577	-10.9819			19.751										11.19	23.038
-22.579	-10.9985			19.751										11.2059	23.074
-22.541	-11.015			19.751										11.2259	23.162
-22.537	-11.0305			19.751										11.2419	23.19
-22.553	-11.0505			19.751										11.2584	23.254
-22.542	-11.0663			19.751										11.2745	23.289
-22.469	-11.0822			19.751										11.29	23.425
-22.404	-11.0989			19.751										11.3058	23.506
-22.471	-11.115			19.751										11.322	23.515
-22.644	-11.1299			19.751										11.3385	23.501
-22.819	-11.1461			19.751										11.3588	23.645
-22.983	-11.1619			19.751										11.375	23.746
-23.09	-11.1748			19.751										11.39	23.677
-23.038	-11.19			19.751										11.4063	23.687
-23.074	-11.2059			19.751										11.4186	23.614
-23.162	-11.2259			19.751										11.4349	23.653
-23.19	-11.2419			19.751										11.45	23.755
-23.254	-11.2584			19.751										11.466	23.803
-23.289	-11.2745			19.751										11.482	23.663
-23.425	-11.29			19.751										11.4989	23.634
-23.506	-11.3058			19.751										11.5149	23.745
-23.515	-11.322			19.751										11.5344	23.821
-23.501	-11.3385			19.751										11.55	23.905
-23.645	-11.3588			19.751										11.5655	23.946
-23.746	-11.375			19.751										11.5816	24.024
-23.677	-11.39			19.751										11.5981	23.995
-23.687	-11.4063			19.751										11.6144	24.023
-23.614	-11.4186			19.751										11.6299	23.991
-23.653	-11.4349			19.751										11.6459	23.964
-23.755	-11.45			19.751										11.666	23.98
-23.803	-11.466			19.751										11.682	24.07
-23.663	-11.482			19.751										11.6984	24.142
-23.634	-11.4989			19.751										11.7146	24.227
-23.745	-11.5149			19.751										11.7258	24.344
-23.821	-11.5344			19.751										11.7417	24.53
-23.905	-11.55			19.751										11.7581	24.662
-23.946	-11.5655			19.751										11.7742	24.856
-24.024	-11.5816			19.751										11.79	24.288
-23.995	-11.5981			19.751										11.8074	24.051
-24.023	-11.6144			19.751										11.8229	24.321
-23.991	-11.6299			19.751										11.8416	24.672
-23.964	-11.6459			19.751										11.8578	24.997
-23.98	-11.666			19.751										11.874	25.139
-24.07	-11.682			19.751										11.89	25.382
-24.142	-11.6984			19.751										11.905	25.548
-24.227	-11.7146			19.751										11.921	25.79
-24.344	-11.7258			19.751										11.945	26.094
-24.53	-11.7417			19.751										11.9576	26.275
-24.662	-11.7581			19.751										11.974	26.49
-24.856	-11.7742			19.751										11.99	26.688
-24.288	-11.79			19.751										12.0054	26.694
-24.051	-11.8074			19.751										12.0214	26.85
-24.321	-11.8229			19.751										12.0343	26.893
-24.672	-11.8416			19.751										12.05	27.038
-24.997	-11.8578			19.751										12.0654	27.216
-25.139	-11.874			19.751										12.0811	27.021
-25.382	-11.89			19.751										12.098	27.139
-25.548	-11.905			19.751										12.1142	27.097
-25.79	-11.921			19.751										12.1299	27.302
-26.094	-11.945			19.751										12.15	27.444
-26.275	-11.9576			19.751										12.1653	27.569
-26.49	-11.974			19.751										12.1813	27.724
-26.688	-11.99			19.751										12.1979	27.778
-26.694	-12.0054			19.751										12.2142	27.96
-26.85	-12.0214			19.751										12.23	28.173
-26.893	-12.0343			19.751										12.2454	28.339
-27.038	-12.05			19.751										12.2613	28.477
-27.216	-12.0654			19.751										12.2813	28.605
-27.021	-12.0811			19.751										12.2981	28.805
-27.139	-12.098			19.751										12.3144	28.804
-27.097	-12.1142			19.751										12.33	28.782
-27.302	-12.1299			19.751										12.3419	28.78
-27.444	-12.15			19.751										12.3585	28.846
-27.569	-12.1653			19.751										12.3749	28.884
-27.724	-12.1813			19.751										12.3902	28.841
-27.778	-12.1979			19.751										12.419	27.195
-27.96	-12.2142			19.751										12.4457	21.222
-28.173	-12.23			19.751										12.445	19.779
-28.339	-12.2454			19.751										12.4588	21.006
-28.477	-12.2613													12.4746	21.324
-28.605	-12.2813													12.4898	21.399
-28.805	-12.2981													12.5049	21.89
-28.804	-12.3144													12.5262	21.878
-28.782	-12.33													12.5466	21.713
-28.78	-12.3419													12.561	21.867
-28.846	-12.3585													12.5784	21.856
-28.884	-12.3749													12.5931	22.002
-28.841	-12.3902													12.61	22.158
-27.195	-12.419													12.625	22.192
-21.222	-12.4457													12.6403	22.268
-19.779	-12.445													12.6577	22.255
-21.006	-12.4588													12.6772	22.401
-21.324	-12.4746													12.6935	22.329
-21.399	-12.4898													12.7097	22.275
-21.89	-12.5049													12.7251	22.334
-21.878	-12.5262													12.742	21.998
-21.713	-12.5466													12.7541	21.824
-21.867	-12.561													12.77	21.75
-21.856	-12.5784													12.785	21.865
-22.002	-12.5931													12.8006	21.969
-22.158	-12.61													12.8175	21.963
-22.192	-12.625													12.8339	21.994
-22.268	-12.6403													12.8542	21.961
-22.255	-12.6577													12.8701	21.703
-22.401	-12.6772													12.8856	21.375
-22.329	-12.6935													12.9015	21.196
-22.275	-12.7097													12.9175	21.204
-22.334	-12.7251													12.9334	21.245
-21.998	-12.742													12.9494	21.419
-21.824	-12.7541													12.965	21.538
-21.75	-12.77													12.9849	21.255
-21.865	-12.785													13.0003	21.29
-21.969	-12.8006													13.0169	21.401
-21.963	-12.8175													13.0331	21.367
-21.994	-12.8339													13.0531	21.543
-21.961	-12.8542													13.0731	21.777
-21.703	-12.8701													13.0893	21.953
-21.375	-12.8856													13.105	22.174
-21.196	-12.9015													13.1201	22.345
-21.204	-12.9175													13.1368	22.464
-21.245	-12.9334													13.153	22.681
-21.419	-12.9494													13.1692	22.75
-21.538	-12.965													13.1851	22.876
-21.255	-12.9849													13.205	22.942
-21.29	-13.0003													13.2209	22.954
-21.401	-13.0169													13.2379	22.918
-21.367	-13.0331													13.254	22.762
-21.543	-13.0531													13.2655	22.734
-21.777	-13.0731													13.2815	22.671
-21.953	-13.0893													13.2978	22.707
-22.174	-13.105													13.3139	22.605
-22.345	-13.1201													13.33	22.468
-22.464	-13.1368													13.3459	22.414
-22.681	-13.153													13.3622	22.36
-22.75	-13.1692													13.3822	22.273
-22.876	-13.1851													13.3991	22.115
-22.942	-13.205													13.4149	22.02
-22.954	-13.2209													13.43	21.848
-22.918	-13.2379													13.4457	21.755
-22.762	-13.254													13.4621	21.585
-22.734	-13.2655													13.4786	21.538
-22.671	-13.2815													13.4943	21.446
-22.707	-13.2978													13.5134	21.552
-22.605	-13.3139													13.5291	21.608
-22.468	-13.33													13.545	21.713
-22.414	-13.3459													13.5612	21.704
-22.36	-13.3622													13.5748	21.639
-22.273	-13.3822													13.59	21.602
-22.115	-13.3991													13.6055	21.318
-22.02	-13.4149													13.6219	21.205
-21.848	-13.43													13.6455	20.92
-21.755	-13.4457													13.6581	20.902
-21.585	-13.4621													13.67	20.923
-21.538	-13.4786													13.6851	20.96
-21.446	-13.4943													13.6971	20.927
-21.552	-13.5134													13.7134	20.982
-21.608	-13.5291													13.7251	21.015
-21.713	-13.545													13.7376	21.007
-21.704	-13.5612													13.7539	20.987
-21.639	-13.5748													13.77	20.889
-21.602	-13.59													13.7815	20.837
-21.318	-13.6055													13.7979	20.793
-21.205	-13.6219													13.8207	20.797
-20.92	-13.6455													13.8333	20.753
-20.902	-13.6581													13.845	20.775
-20.923	-13.67													13.8602	20.898
-20.96	-13.6851													13.8801	21.007
-20.927	-13.6971													13.8966	21.077
-20.982	-13.7134													13.9126	21.173
-21.015	-13.7251													13.9287	21.323
-21.007	-13.7376													13.9445	21.532
-20.987	-13.7539													13.96	21.685
-20.889	-13.77													13.9767	21.739
-20.837	-13.7815													13.9943	21.651
-20.793	-13.7979													14.008	21.32
-20.797	-13.8207													14.0247	20.92
-20.753	-13.8333													14.0396	20.813
-20.775	-13.845													14.0575	20.993
-20.898	-13.8602													14.07	20.994
-21.007	-13.8801													14.075	20.821
-21.077	-13.8966													14.075	20.477
-21.173	-13.9126													14.07	20.407
-21.323	-13.9287													14.075	20.236
-21.532	-13.9445													14.0705	20.25
-21.685	-13.96													14.075	20.079
-21.739	-13.9767													14.0748	20.138
-21.651	-13.9943
-21.32	-14.008
-20.92	-14.0247
-20.813	-14.0396
-20.993	-14.0575
-20.994	-14.07
-20.821	-14.075
-20.477	-14.075
-20.407	-14.07
-20.236	-14.075
-20.25	-14.0705
-20.079	-14.075
-20.138	-14.0748

## Sheet: MSA112,5L80
WORKSHOP 3 EXPORTED DATA: [C:\Users\Maleki\2012-4-14\Ma135l80.w01 - 1]					DISPLACEMENT(mm)	LOAD(KN)									DISPLACEMENT(mm)	LOAD(KN)
*************************************************************************************************				25.316	0	0									0.005	-0.011
Source of data: ToolKit				25.316	0.0161	0.64839									0.005	-0.001
WS3 File Version: 1.04				25.316	0.0321	0.903527									0.005	-0.004
Number of bytes in subfile: 8390				25.316	0.0481	1.16887									0.0004	-0.009
Total number of data points: 1009				25.316	0.0639	1.45394									0.005	-0.007
Test date: 14/05/2012				25.316	0.0796	1.74106									0.005	-0.004
Test time: 23:22:03				25.316	0.0957	2.04586									0.0014	-0.006
Player Step: 1				25.316	0.1156	2.44796									0.005	-0.01
Step Capture No: 1				25.316	0.1316	2.78542									0.005	-0.001
Actuator: 1				25.316	0.1475	3.15554									0.0005	-0.006
*************************************************************************************************				25.316	0.1639	3.55832									0.0033	-0.004
Actuator: 1 Channel:0	Actuator: 1 Channel:1			25.316	0.1789	3.97947									0.005	-0.007
Load Current (kN)	Stroke Current (mm)			25.316	0.1911	4.33666									0.005	-0.002
0.011	-0.005			25.316	0.207	4.8306									0.0044	-0.001
0.001	-0.005	fc	25.316	25.316	0.2236	5.36809									0.0025	-0.011
0.004	-0.005			25.316	0.2389	5.94845									0.005	0
0.009	-0.0004			25.316	0.2547	6.58459									0.005	0.001
0.007	-0.005			25.316	0.2708	7.25135									0.0011	-0.003
0.004	-0.005			25.316	0.2909	8.11473									0.0005	0.004
0.006	-0.0014			25.316	0.307	8.77537									0.0003	-0.005
0.01	-0.005			25.316	0.3236	9.52854									0.005	0.002
0.001	-0.005			25.316	0.3389	10.3001									0.0207	0.006
0.006	-0.0005			25.316	0.3546	11.1356									0.0372	0.008
0.004	-0.0033			25.316	0.3707	11.9989									0.0533	0.009
0.007	-0.005			25.316	0.3867	12.9018									0.0694	0.02
0.002	-0.005			25.316	0.4033	13.8706									0.085	0.018
0.001	-0.0044			25.316	0.4144	14.6415									0.1006	0.019
0.011	-0.0025			25.316	0.4304	15.7314			MAX LOAD(KN)	@ DISPLACEMENT(mm)					0.1173	0.022
0	-0.005			25.316	0.4462	16.8615			243.63	1.6646					0.1373	0.025
-0.001	-0.005			25.316	0.4655	18.3645			delta ultimate	4.4939					0.1535	0.027
0.003	-0.0011			25.316	0.4818	19.7701									0.1696	0.028
-0.004	-0.0005			25.316	0.4976	21.2322									0.185	0.039
0.005	-0.0003			25.316	0.5135	22.614									0.2001	0.056
-0.002	-0.005			25.316	0.5289	24.0163									0.2168	0.066
-0.006	-0.0207			25.316	0.544	25.7036									0.233	0.088
-0.008	-0.0372			25.316	0.5604	27.2541									0.2493	0.092
-0.009	-0.0533			25.316	0.5762	28.9088									0.2604	0.096
-0.02	-0.0694			25.316	0.5958	31.0962									0.2769	0.097
-0.018	-0.085			25.316	0.6117	32.9379									0.2931	0.108
-0.019	-0.1006			25.316	0.6273	34.8069									0.3093	0.11
-0.022	-0.1173			25.316	0.6438	36.7316									0.3202	0.12
-0.025	-0.1373			25.316	0.6589	38.7306									0.3368	0.13
-0.027	-0.1535			25.316	0.6745	40.8023									0.3568	0.154
-0.028	-0.1696			25.316	0.6905	42.9067									0.3731	0.177
-0.039	-0.185			25.316	0.7064	45.0328									0.3891	0.176
-0.056	-0.2001			25.316	0.7189	46.6813									0.405	0.176
-0.066	-0.2168			25.316	0.7341	48.8728									0.4202	0.175
-0.088	-0.233			25.316	0.7502	51.0642									0.437	0.177
-0.092	-0.2493			25.316	0.7703	53.8354									0.4532	0.172
-0.096	-0.2604			25.316	0.7863	56.0316									0.4694	0.178
-0.097	-0.2769			25.316	0.8029	58.2333									0.4893	0.176
-0.108	-0.2931			25.316	0.8189	60.4826									0.505	0.168
-0.11	-0.3093			25.316	0.8339	62.7359									0.5202	0.16
-0.12	-0.3202			25.316	0.8499	65.0193									0.5369	0.161
-0.13	-0.3368			25.316	0.8659	67.2958									0.553	0.162
-0.154	-0.3568			25.316	0.8825	69.6022									0.565	0.163
-0.177	-0.3731			25.316	0.9024	72.5026									0.5802	0.17
-0.176	-0.3891			25.316	0.9139	74.2518									0.5969	0.167
-0.176	-0.405			25.316	0.9255	75.9881									0.613	0.174
-0.175	-0.4202			25.316	0.9453	78.8994									0.6292	0.17
-0.177	-0.437			25.316	0.9618	81.2882									0.645	0.166
-0.172	-0.4532			25.316	0.978	83.6606									0.665	0.175
-0.178	-0.4694			25.316	0.9939	86.0446									0.68	0.177
-0.176	-0.4893			25.316	1.0089	88.3987									0.6968	0.175
-0.168	-0.505			25.316	1.025	90.7255									0.713	0.174
-0.16	-0.5202			25.316	1.0415	93.0878									0.7291	0.172
-0.161	-0.5369			25.316	1.0574	95.4555									0.745	0.177
-0.162	-0.553			25.316	1.0771	98.445									0.76	0.177
-0.163	-0.565			25.316	1.093	100.858									0.7767	0.183
-0.17	-0.5802			25.316	1.1087	103.238									0.7967	0.182
-0.167	-0.5969			25.316	1.1239	105.636									0.8129	0.183
-0.174	-0.613			25.316	1.14	108.037									0.829	0.186
-0.17	-0.6292			25.316	1.1522	109.849									0.845	0.183
-0.166	-0.645			25.316	1.1679	112.226									0.86	0.189
-0.175	-0.665			25.316	1.1839	114.569									0.8766	0.191
-0.177	-0.68			25.316	1.1989	116.435									0.8928	0.191
-0.175	-0.6968			25.316	1.2111	118.31									0.909	0.189
-0.174	-0.713			25.316	1.2239	120.143									0.929	0.188
-0.172	-0.7291			25.316	1.2454	123.401									0.9449	0.193
-0.177	-0.745			25.316	1.2635	125.807									0.96	0.195
-0.177	-0.76			25.316	1.2803	128.243									0.9767	0.198
-0.183	-0.7767			25.316	1.3017	131.082									0.9928	0.193
-0.182	-0.7967			25.316	1.3178	133.166									1.0089	0.191
-0.183	-0.8129			25.316	1.3371	135.736									1.0249	0.192
-0.186	-0.829			25.316	1.3526	137.812									1.04	0.202
-0.183	-0.845			25.316	1.3682	139.819									1.06	0.206
-0.189	-0.86			25.316	1.3839	141.814									1.0766	0.205
-0.191	-0.8766			25.316	1.3992	143.876									1.0889	0.204
-0.191	-0.8928			25.316	1.4155	145.894									1.105	0.205
-0.189	-0.909			25.316	1.4315	147.912									1.12	0.207
-0.188	-0.929			25.316	1.4484	150.266									1.1366	0.207
-0.193	-0.9449			25.316	1.4705	153.389									1.1528	0.204
-0.195	-0.96			25.316	1.4878	155.584									1.169	0.204
-0.198	-0.9767			25.316	1.5039	171.292									1.1849	0.209
-0.193	-0.9928			25.316	1.5205	187.004									1.2	0.211
-0.191	-1.0089			25.316	1.5329	208.986									1.2166	0.214
-0.192	-1.0249			25.316	1.5489	211.014									1.2366	0.215
-0.202	-1.04			25.316	1.5641	219.895									1.2529	0.216
-0.206	-1.06			25.316	1.5807	228.753									1.269	0.218
-0.205	-1.0766			25.316	1.5971	237.476									1.285	0.214
-0.204	-1.0889			25.316	1.6132	239.268									1.3	0.213
-0.205	-1.105			25.316	1.6289	240.809									1.3167	0.214
-0.207	-1.12			25.316	1.6489	242.331									1.3328	0.212
-0.207	-1.1366			25.316	1.6646	243.63									1.349	0.211
-0.204	-1.1528			25.316	1.6812	204.173									1.369	0.215
-0.204	-1.169			25.316	1.6973	191.958									1.385	0.221
-0.209	-1.1849			25.316	1.7134	179.635									1.3966	0.215
-0.211	-1.2			25.316	1.7289	180.489									1.4128	0.217
-0.214	-1.2166			25.316	1.7449	180.983									1.429	0.215
-0.215	-1.2366			25.316	1.762	181.04									1.445	0.216
-0.216	-1.2529			25.316	1.782	181.099									1.46	0.22
-0.218	-1.269			25.316	1.7981	181.512									1.4766	0.217
-0.214	-1.285			25.316	1.8139	181.934									1.4928	0.226
-0.213	-1.3			25.316	1.8289	182.39									1.509	0.218
-0.214	-1.3167			25.316	1.845	182.493									1.525	0.214
-0.212	-1.3328			25.316	1.8617	182.437									1.545	0.222
-0.211	-1.349			25.316	1.8781	182.161									1.56	0.224
-0.215	-1.369			25.316	1.8938	181.753									1.5767	0.218
-0.221	-1.385			25.316	1.9133	181.274									1.5928	0.217
-0.215	-1.3966			25.316	1.9289	180.799									1.605	0.222
-0.217	-1.4128			25.316	1.9443	180.151									1.62	0.219
-0.215	-1.429			25.316	1.9576	179.487									1.6366	0.212
-0.216	-1.445			25.316	1.9739	178.083									1.6527	0.218
-0.22	-1.46			25.316	1.9912	175.957									1.6689	0.226
-0.217	-1.4766			25.316	2.0083	173.372									1.6849	0.224
-0.226	-1.4928			25.316	2.0242	170.844									1.7	0.222
-0.218	-1.509			25.316	2.2045	153.179									1.72	0.226
-0.214	-1.525			25.316	2.1309	118.908									1.7366	0.231
-0.222	-1.545			25.316	2.098	106.145									1.7528	0.23
-0.224	-1.56			25.316	2.1024	104.474									1.769	0.228
-0.218	-1.5767			25.316	2.1043	106.786									1.785	0.22
-0.217	-1.5928			25.316	2.1232	110.855									1.8	0.226
-0.222	-1.605			25.316	2.1285	114.939									1.8129	0.232
-0.219	-1.62			25.316	2.1439	119.714									1.829	0.224
-0.212	-1.6366			25.316	2.1589	126.286									1.845	0.234
-0.218	-1.6527			25.316	2.1739	131.956									1.86	0.236
-0.226	-1.6689			25.316	2.192	137.585									1.8766	0.235
-0.224	-1.6849			25.316	2.2122	143.313									1.8967	0.238
-0.222	-1.7			25.316	2.2315	146.365									1.9128	0.245
-0.226	-1.72			25.316	2.2484	148.412									1.929	0.249
-0.231	-1.7366			25.316	2.2621	147.973									1.945	0.25
-0.23	-1.7528			25.316	2.28	147.075									1.96	0.245
-0.228	-1.769			25.316	2.2945	144.958									1.9766	0.249
-0.22	-1.785			25.316	2.3185	142.529									1.9928	0.247
-0.226	-1.8			25.316	2.354	136.167									2.009	0.249
-0.232	-1.8129			25.316	2.3589	131.152									2.029	0.25
-0.224	-1.829			25.316	2.3628	131.003									2.045	0.245
-0.234	-1.845			25.316	2.3741	133.25									2.06	0.241
-0.236	-1.86			25.316	2.3939	136.108									2.0766	0.245
-0.235	-1.8766			25.316	2.4171	136.473									2.0929	0.234
-0.238	-1.8967			25.316	2.4489	128.61									2.1089	0.237
-0.245	-1.9128			25.316	2.4557	125.617									2.12	0.232
-0.249	-1.929			25.316	2.4637	125.613									2.1366	0.232
-0.25	-1.945			25.316	2.4751	127.695									2.1529	0.223
-0.245	-1.96			25.316	2.4916	129.395									2.169	0.218
-0.249	-1.9766			25.316	2.5253	128.238									2.185	0.222
-0.247	-1.9928			25.316	2.5506	120.911									2.2049	0.229
-0.249	-2.009			25.316	2.5647	117.349									2.22	0.34
-0.25	-2.029			25.316	2.5755	115.071									2.2361	0.612
-0.245	-2.045			25.316	2.582	114.821									2.2522	0.953
-0.241	-2.06			25.316	2.5915	115.916									2.2682	1.328
-0.245	-2.0766			25.316	2.6039	118.597									2.2842	1.718
-0.234	-2.0929			25.316	2.6177	121.335									2.3	2.137
-0.237	-2.1089			25.316	2.6339	122.984									2.3157	2.559
-0.232	-2.12			25.316	2.6716	121.172									2.3318	3.007
-0.232	-2.1366			25.316	2.69	114.57									2.3517	3.598
-0.223	-2.1529			25.316	2.6989	111.637									2.3677	4.094
-0.218	-2.169			25.316	2.7127	111.158									2.3836	4.638
-0.222	-2.185			25.316	2.7232	112.516									2.4	5.23
-0.229	-2.2049			25.316	2.7339	114.038									2.415	5.849
-0.34	-2.22			25.316	2.7489	115.724									2.4272	6.374
-0.612	-2.2361			25.316	2.7732	116.091									2.4431	7.1
-0.953	-2.2522			25.316	2.7989	111.811									2.4597	7.89
-1.328	-2.2682			25.316	2.8139	109.611									2.475	8.743
-1.718	-2.2842			25.316	2.8282	108.412									2.4908	9.678
-2.137	-2.3			25.316	2.8439	107.801									2.5069	10.658
-2.559	-2.3157			25.316	2.861	108.103									2.527	11.927
-3.007	-2.3318			25.316	2.8808	107.333									2.5431	12.898
-3.598	-2.3517			25.316	2.8948	105.725									2.5597	14.005
-4.094	-2.3677			25.316	2.9089	103.247									2.575	15.139
-4.638	-2.3836			25.316	2.9236	101.396									2.5907	16.367
-5.23	-2.4			25.316	2.9378	99.5411									2.6068	17.636
-5.849	-2.415			25.316	2.9532	97.7653									2.6228	18.963
-6.374	-2.4272			25.316	2.9689	95.9514									2.6394	20.387
-7.1	-2.4431			25.316	2.9866	93.4361									2.6505	21.52
-7.89	-2.4597			25.316	3.0057	89.4703									2.6665	23.122
-8.743	-2.475			25.316	3.0257	83.9273									2.6823	24.783
-9.678	-2.4908			25.316	3.0514	74.573									2.7016	26.992
-10.658	-2.5069			25.316	3.0689	65.8718									2.7179	29.058
-11.927	-2.527			25.316	3.0822	59.062									2.7337	31.207
-12.898	-2.5431			25.316	3.0939	53.9585									2.7496	33.238
-14.005	-2.5597			25.316	3.1039	51.1037									2.765	35.299
-15.139	-2.575			25.316	3.1189	47.9278									2.7801	37.779
-16.367	-2.5907			25.316	3.1331	45.375									2.7965	40.058
-17.636	-2.6068			25.316	3.1473	43.4244									2.8123	42.49
-18.963	-2.6228			25.316	3.1626	41.899									2.8319	45.705
-20.387	-2.6394			25.316	3.1782	40.5648									2.8478	48.412
-21.52	-2.6505			25.316	3.1938	39.4266									2.8634	51.159
-23.122	-2.6665			25.316	3.2133	38.1652									2.8799	53.988
-24.783	-2.6823			25.316	3.2289	37.2167									2.895	56.926
-26.992	-2.7016			25.316	3.2439	36.1853									2.9106	59.971
-29.058	-2.7179			25.316	3.2556	35.4798									2.9266	63.064
-31.207	-2.7337			25.316	3.2709	34.5592									2.9425	66.189
-33.238	-2.7496			25.316	3.2865	33.6183									2.955	68.612
-35.299	-2.765			25.316	3.2989	32.9318									2.9702	71.833
-37.779	-2.7801			25.316	3.3139	32.1664									2.9863	75.054
-40.058	-2.7965			25.316	3.3289	31.6262									3.0064	79.127
-42.49	-2.8123			25.316	3.3442	31.1955									3.0224	82.355
-45.705	-2.8319			25.316	3.3608	30.7723									3.039	85.591
-48.412	-2.8478			25.316	3.3768	30.3967									3.055	88.897
-51.159	-2.8634			25.316	3.393	29.9906									3.07	92.209
-53.988	-2.8799			25.316	3.4089	29.5184									3.086	95.565
-56.926	-2.895			25.316	3.4289	29.0721									3.102	98.911
-59.971	-2.9106			25.316	3.444	28.7537									3.1186	102.301
-63.064	-2.9266			25.316	3.4609	28.3284									3.1385	106.564
-66.189	-2.9425			25.316	3.4733	27.9971									3.15	109.135
-68.612	-2.955			25.316	3.4889	27.6154									3.1616	111.687
-71.833	-2.9702			25.316	3.5008	27.3344									3.1814	115.966
-75.054	-2.9863			25.316	3.517	26.9677									3.1979	119.477
-79.127	-3.0064			25.316	3.5289	26.6057									3.2141	122.964
-82.355	-3.0224			25.316	3.5409	26.3506									3.23	126.468
-85.591	-3.039			25.316	3.5603	26.1655									3.245	129.928
-88.897	-3.055			25.316	3.5765	26.0009									3.2611	133.348
-92.209	-3.07			25.316	3.5926	25.8798									3.2776	136.82
-95.565	-3.086			25.316	3.6039	25.7492									3.2935	140.3
-98.911	-3.102			25.316	3.6239	25.6301									3.3132	144.694
-102.301	-3.1186			25.316	3.64	25.6138									3.3291	148.24
-106.564	-3.1385			25.316	3.6562	25.6165									3.3448	151.739
-109.135	-3.15			25.316	3.6722	25.6403									3.36	155.263
-111.687	-3.1616			25.316	3.6884	25.6798									3.3761	158.793
-115.966	-3.1814			25.316	3.7	25.726									3.3883	161.456
-119.477	-3.1979			25.316	3.7158	25.8873									3.404	164.949
-122.964	-3.2141			25.316	3.736	25.9921									3.42	168.393
-126.468	-3.23			25.316	3.7523	26.0308									3.435	171.136
-129.928	-3.245			25.316	3.7685	25.9995									3.4472	173.891
-133.348	-3.2611			25.316	3.7839	25.9492									3.46	176.586
-136.82	-3.2776			25.316	3.8003	25.9274									3.4815	181.374
-140.3	-3.2935			25.316	3.8165	25.8784									3.4996	184.911
-144.694	-3.3132			25.316	3.8325	25.8614									3.5164	188.491
-148.24	-3.3291			25.316	3.8439	25.8621									3.5378	192.664
-151.739	-3.3448			25.316	3.8602	25.8846									3.5539	195.727
-155.263	-3.36			25.316	3.8765	25.8553									3.5732	199.504
-158.793	-3.3761			25.316	3.8927	25.8015									3.5887	202.555
-161.456	-3.3883			25.316	3.9128	25.7315									3.6043	205.506
-164.949	-3.404			25.316	3.9289	25.6362									3.62	208.438
-168.393	-3.42			25.316	3.944	25.4961									3.6353	211.468
-171.136	-3.435			25.316	3.9605	25.394									3.6516	214.435
-173.891	-3.4472			25.316	3.9768	25.3103									3.6676	217.401
-176.586	-3.46			25.316	3.9929	25.2573									3.6845	220.86
-181.374	-3.4815			25.316	4.0039	25.2205									3.7066	225.451
-184.911	-3.4996			25.316	4.0203	25.2804									3.7239	228.677
-188.491	-3.5164			25.316	4.0365	25.3076									3.74	251.764
-192.664	-3.5378			25.316	4.0529	25.2688									3.7566	274.858
-195.727	-3.5539			25.316	4.0687	25.2872									3.769	307.166
-199.504	-3.5732			25.316	4.0886	25.3409									3.785	310.148
-202.555	-3.5887			25.316	4.1039	25.3525									3.8002	323.2
-205.506	-3.6043			25.316	4.1206	25.3355									3.8168	336.22
-208.438	-3.62			25.316	4.1364	25.4083									3.8332	349.041
-211.468	-3.6353			25.316	4.1523	25.592									3.8493	351.675
-214.435	-3.6516			25.316	4.1639	25.6471									3.865	353.94
-217.401	-3.6676			25.316	4.1802	25.7247									3.885	356.177
-220.86	-3.6845			25.316	4.1964	25.8152									3.9007	358.086
-225.451	-3.7066			25.316	4.2127	25.8315									3.9173	300.092
-228.677	-3.7239			25.316	4.2239	25.7743									3.9334	282.139
-251.764	-3.74			25.316	4.2407	25.7124									3.9495	264.027
-274.858	-3.7566			25.316	4.2568	25.6879									3.965	265.282
-307.166	-3.769			25.316	4.2687	25.7498									3.981	266.008
-310.148	-3.785			25.316	4.2839	25.8818									3.9981	266.092
-323.2	-3.8002			25.316	4.3001	26.0308									4.0181	266.179
-336.22	-3.8168			25.316	4.3163	26.1948									4.0342	266.786
-349.041	-3.8332			25.316	4.3286	26.2295									4.05	267.406
-351.675	-3.8493			25.316	4.3439	26.2574									4.065	268.076
-353.94	-3.865			25.316	4.3605	26.2628									4.0811	268.227
-356.177	-3.885			25.316	4.3768	26.2281									4.0978	268.145
-358.086	-3.9007			25.316	4.3971	26.0873									4.1142	267.739
-300.092	-3.9173			25.316	4.4133	25.9267									4.1299	267.139
-282.139	-3.9334			25.316	4.4289	25.7811									4.1494	266.435
-264.027	-3.9495			25.316	4.4443	25.6369									4.165	265.738
-265.282	-3.965			25.316	4.461	25.5342									4.1804	264.785
-266.008	-3.981			25.316	4.4774	25.2886									4.1937	263.809
-266.092	-3.9981			25.316	4.4939	24.7068									4.21	261.746
-266.179	-4.0181			25.316											4.2273	258.621
-266.786	-4.0342			25.316											4.2444	254.821
-267.406	-4.05			25.316											4.2603	251.105
-268.076	-4.065			25.316											4.4406	225.142
-268.227	-4.0811			25.316											4.367	174.771
-268.145	-4.0978			25.316											4.3341	156.012
-267.739	-4.1142			25.316											4.3385	153.555
-267.139	-4.1299			25.316											4.3404	156.954
-266.435	-4.1494			25.316											4.3593	162.934
-265.738	-4.165			25.316											4.3646	168.937
-264.785	-4.1804			25.316											4.38	175.955
-263.809	-4.1937			25.316											4.395	185.615
-261.746	-4.21			25.316											4.41	193.948
-258.621	-4.2273			25.316											4.4281	202.222
-254.821	-4.2444			25.316											4.4483	210.641
-251.105	-4.2603			25.316											4.4676	215.126
-225.142	-4.4406			25.316											4.4845	218.135
-174.771	-4.367			25.316											4.4982	217.49
-156.012	-4.3341			25.316											4.5161	216.17
-153.555	-4.3385			25.316											4.5306	213.059
-156.954	-4.3404			25.316											4.5546	209.489
-162.934	-4.3593			25.316											4.5901	200.137
-168.937	-4.3646			25.316											4.595	192.767
-175.955	-4.38			25.316											4.5989	192.548
-185.615	-4.395			25.316											4.6102	195.85
-193.948	-4.41			25.316											4.63	200.051
-202.222	-4.4281			25.316											4.6532	200.587
-210.641	-4.4483			25.316											4.685	189.031
-215.126	-4.4676			25.316											4.6918	184.632
-218.135	-4.4845			25.316											4.6998	184.626
-217.49	-4.4982			25.316											4.7112	187.685
-216.17	-4.5161			25.316											4.7277	190.184
-213.059	-4.5306			25.316											4.7614	188.483
-209.489	-4.5546			25.316											4.7867	177.714
-200.137	-4.5901			25.316											4.8008	172.479
-192.767	-4.595			25.316											4.8116	169.131
-192.548	-4.5989			25.316											4.8181	168.763
-195.85	-4.6102			25.316											4.8276	170.373
-200.051	-4.63			25.316											4.84	174.314
-200.587	-4.6532			25.316											4.8538	178.338
-189.031	-4.685			25.316											4.87	180.762
-184.632	-4.6918			25.316											4.9077	178.098
-184.626	-4.6998			25.316											4.9261	168.394
-187.685	-4.7112			25.316											4.935	164.084
-190.184	-4.7277			25.316											4.9488	163.379
-188.483	-4.7614			25.316											4.9593	165.376
-177.714	-4.7867			25.316											4.97	167.613
-172.479	-4.8008			25.316											4.985	170.091
-169.131	-4.8116			25.316											5.0093	170.63
-168.763	-4.8181			25.316											5.035	164.34
-170.373	-4.8276			25.316											5.05	161.106
-174.314	-4.84			25.316											5.0643	159.343
-178.338	-4.8538			25.316											5.08	158.445
-180.762	-4.87			25.316											5.0971	158.89
-178.098	-4.9077			25.316											5.1169	157.757
-168.394	-4.9261			25.316											5.1309	155.394
-164.084	-4.935			25.316											5.145	151.752
-163.379	-4.9488			25.316											5.1597	149.031
-165.376	-4.9593			25.316											5.1739	146.305
-167.613	-4.97			25.316											5.1893	143.695
-170.091	-4.985			25.316											5.205	141.029
-170.63	-5.0093			25.316											5.2227	137.332
-164.34	-5.035			25.316											5.2418	131.503
-161.106	-5.05			25.316											5.2618	123.356
-159.343	-5.0643			25.316											5.2875	109.607
-158.445	-5.08			25.316											5.305	96.818
-158.89	-5.0971			25.316											5.3183	86.809
-157.757	-5.1169			25.316											5.33	79.308
-155.394	-5.1309			25.316											5.34	75.112
-151.752	-5.145			25.316											5.355	70.444
-149.031	-5.1597			25.316											5.3692	66.692
-146.305	-5.1739			25.316											5.3834	63.825
-143.695	-5.1893			25.316											5.3987	61.583
-141.029	-5.205			25.316											5.4143	59.622
-137.332	-5.2227			25.316											5.4299	57.949
-131.503	-5.2418			25.316											5.4494	56.095
-123.356	-5.2618			25.316											5.465	54.701
-109.607	-5.2875			25.316											5.48	53.185
-96.818	-5.305			25.316											5.4917	52.148
-86.809	-5.3183			25.316											5.507	50.795
-79.308	-5.33			25.316											5.5226	49.412
-75.112	-5.34			25.316											5.535	48.403
-70.444	-5.355			25.316											5.55	47.278
-66.692	-5.3692			25.316											5.565	46.484
-63.825	-5.3834			25.316											5.5803	45.851
-61.583	-5.3987			25.316											5.5969	45.229
-59.622	-5.4143			25.316											5.6129	44.677
-57.949	-5.4299			25.316											5.6291	44.08
-56.095	-5.4494			25.316											5.645	43.386
-54.701	-5.465			25.316											5.665	42.73
-53.185	-5.48			25.316											5.6801	42.262
-52.148	-5.4917			25.316											5.697	41.637
-50.795	-5.507			25.316											5.7094	41.15
-49.412	-5.5226			25.316											5.725	40.589
-48.403	-5.535			25.316											5.7369	40.176
-47.278	-5.55			25.316											5.7531	39.637
-46.484	-5.565			25.316											5.765	39.105
-45.851	-5.5803			25.316											5.777	38.73
-45.229	-5.5969			25.316											5.7964	38.458
-44.677	-5.6129			25.316											5.8126	38.216
-44.08	-5.6291			25.316											5.8287	38.038
-43.386	-5.645			25.316											5.84	37.846
-42.73	-5.665			25.316											5.86	37.671
-42.262	-5.6801			25.316											5.8761	37.647
-41.637	-5.697			25.316											5.8923	37.651
-41.15	-5.7094			25.316											5.9083	37.686
-40.589	-5.725			25.316											5.9245	37.744
-40.176	-5.7369			25.316											5.9361	37.812
-39.637	-5.7531			25.316											5.9519	38.049
-39.105	-5.765			25.316											5.9721	38.203
-38.73	-5.777			25.316											5.9884	38.26
-38.458	-5.7964			25.316											6.0046	38.214
-38.216	-5.8126			25.316											6.02	38.14
-38.038	-5.8287			25.316											6.0364	38.108
-37.846	-5.84			25.316											6.0526	38.036
-37.671	-5.86			25.316											6.0686	38.011
-37.647	-5.8761			25.316											6.08	38.012
-37.651	-5.8923			25.316											6.0963	38.045
-37.686	-5.9083			25.316											6.1126	38.002
-37.744	-5.9245			25.316											6.1288	37.923
-37.812	-5.9361			25.316											6.1489	37.82
-38.049	-5.9519			25.316											6.165	37.68
-38.203	-5.9721			25.316											6.1801	37.474
-38.26	-5.9884			25.316											6.1966	37.324
-38.214	-6.0046			25.316											6.2129	37.201
-38.14	-6.02			25.316											6.229	37.123
-38.108	-6.0364			25.316											6.24	37.069
-38.036	-6.0526			25.316											6.2564	37.157
-38.011	-6.0686			25.316											6.2726	37.197
-38.012	-6.08			25.316											6.289	37.14
-38.045	-6.0963			25.316											6.3048	37.167
-38.002	-6.1126			25.316											6.3247	37.246
-37.923	-6.1288			25.316											6.34	37.263
-37.82	-6.1489			25.316											6.3567	37.238
-37.68	-6.165			25.316											6.3725	37.345
-37.474	-6.1801			25.316											6.3884	37.615
-37.324	-6.1966			25.316											6.4	37.696
-37.201	-6.2129			25.316											6.4163	37.81
-37.123	-6.229			25.316											6.4325	37.943
-37.069	-6.24			25.316											6.4488	37.967
-37.157	-6.2564			25.316											6.46	37.883
-37.197	-6.2726			25.316											6.4768	37.792
-37.14	-6.289			25.316											6.4929	37.756
-37.167	-6.3048			25.316											6.5048	37.847
-37.246	-6.3247			25.316											6.52	38.041
-37.263	-6.34			25.316											6.5362	38.26
-37.238	-6.3567			25.316											6.5524	38.501
-37.345	-6.3725			25.316											6.5647	38.552
-37.615	-6.3884			25.316											6.58	38.593
-37.696	-6.4			25.316											6.5966	38.601
-37.81	-6.4163			25.316											6.6129	38.55
-37.943	-6.4325			25.316											6.6332	38.343
-37.967	-6.4488			25.316											6.6494	38.107
-37.883	-6.46			25.316											6.665	37.893
-37.792	-6.4768			25.316											6.6804	37.681
-37.756	-6.4929			25.316											6.6971	37.53
-37.847	-6.5048			25.316											6.7135	37.169
-38.041	-6.52			25.316											6.73	36.314
-38.26	-6.5362			25.316											6.7462	35.139
-38.501	-6.5524			25.316											6.7662	33.774
-38.552	-6.5647			25.316											6.7784	33.188
-38.593	-6.58			25.316											6.79	32.753
-38.601	-6.5966			25.316											6.81	32.079
-38.55	-6.6129			25.316											6.8252	31.42
-38.343	-6.6332			25.316											6.8412	30.82
-38.107	-6.6494			25.316											6.8576	30.394
-37.893	-6.665			25.316											6.8735	30.079
-37.681	-6.6804			25.316											6.8898	29.672
-37.53	-6.6971			25.316											6.9052	29.083
-37.169	-6.7135			25.316											6.9213	28.42
-36.314	-6.73			25.316											6.941	27.795
-35.139	-6.7462			25.316											6.9572	27.609
-33.774	-6.7662			25.316											6.9732	27.497
-33.188	-6.7784			25.316											6.985	27.423
-32.753	-6.79			25.316											7.0001	27.375
-32.079	-6.81			25.316											7.0168	27.404
-31.42	-6.8252			25.316											7.0329	27.424
-30.82	-6.8412			25.316											7.0494	27.44
-30.394	-6.8576			25.316											7.065	27.362
-30.079	-6.8735			25.316											7.0805	27.249
-29.672	-6.8898			25.316											7.0973	27.056
-29.083	-6.9052			25.316											7.1175	26.798
-28.42	-6.9213			25.316											7.1336	26.658
-27.795	-6.941			25.316											7.1497	26.556
-27.609	-6.9572			25.316											7.165	26.654
-27.497	-6.9732			25.316											7.1803	26.805
-27.423	-6.985			25.316											7.1932	26.883
-27.375	-7.0001			25.316											7.2094	26.928
-27.404	-7.0168			25.316											7.225	26.942
-27.424	-7.0329			25.316											7.2406	26.896
-27.44	-7.0494			25.316											7.2573	26.876
-27.362	-7.065			25.316											7.2734	26.861
-27.249	-7.0805			25.316											7.2936	26.676
-27.056	-7.0973			25.316											7.3097	26.574
-26.798	-7.1175			25.316											7.325	26.577
-26.658	-7.1336			25.316											7.3403	26.612
-26.556	-7.1497			25.316											7.3569	26.705
-26.654	-7.165			25.316											7.3731	26.81
-26.805	-7.1803			25.316											7.389	26.93
-26.883	-7.1932			25.316											7.4	27.08
-26.928	-7.2094			25.316											7.4164	27.348
-26.942	-7.225			25.316											7.4326	27.613
-26.896	-7.2406			25.316											7.4486	27.896
-26.876	-7.2573			25.316											7.4686	28.25
-26.861	-7.2734			25.316											7.4847	28.529
-26.676	-7.2936			25.316											7.5	28.67
-26.574	-7.3097			25.316											7.5167	28.759
-26.577	-7.325			25.316											7.5332	28.655
-26.612	-7.3403			25.316											7.5491	28.689
-26.705	-7.3569			25.316											7.565	28.815
-26.81	-7.3731			25.316											7.58	28.98
-26.93	-7.389			25.316											7.6001	29.068
-27.08	-7.4			25.316											7.6167	29.165
-27.348	-7.4164			25.316											7.6329	29.299
-27.613	-7.4326			25.316											7.6493	29.376
-27.896	-7.4486			25.316											7.665	29.35
-28.25	-7.4686			25.316											7.6807	29.28
-28.529	-7.4847			25.316											7.6973	29.242
-28.67	-7.5			25.316											7.7098	29.181
-28.759	-7.5167			25.316											7.725	29.077
-28.655	-7.5332			25.316											7.7409	28.973
-28.689	-7.5491			25.316											7.7573	28.932
-28.815	-7.565			25.316											7.7772	29.002
-28.98	-7.58			25.316											7.7934	29.046
-29.068	-7.6001			25.316											7.8098	29.002
-29.165	-7.6167			25.316											7.825	28.994
-29.299	-7.6329			25.316											7.8408	28.936
-29.376	-7.6493			25.316											7.8575	28.905
-29.35	-7.665			25.316											7.8697	28.941
-29.28	-7.6807			25.316											7.885	28.924
-29.242	-7.6973			25.316											7.9007	28.897
-29.181	-7.7098			25.316											7.9136	28.905
-29.077	-7.725			25.316											7.9298	28.85
-28.973	-7.7409			25.316											7.945	28.756
-28.932	-7.7573			25.316											7.9609	28.677
-29.002	-7.7772			25.316											7.9776	28.647
-29.046	-7.7934			25.316											7.994	28.609
-29.002	-7.8098			25.316											8.014	28.488
-28.994	-7.825			25.316											8.03	28.316
-28.936	-7.8408			25.316											8.0452	28.197
-28.905	-7.8575			25.316											8.0616	27.921
-28.941	-7.8697			25.316											8.0779	27.833
-28.924	-7.885			25.316											8.0945	27.625
-28.897	-7.9007			25.316											8.11	27.417
-28.905	-7.9136			25.316											8.1251	27.335
-28.85	-7.9298			25.316											8.1376	27.284
-28.756	-7.945			25.316											8.1538	27.266
-28.677	-7.9609			25.316											8.1697	27.298
-28.647	-7.9776			25.316											8.1897	27.31
-28.609	-7.994			25.316											8.205	27.336
-28.488	-8.014			25.316											8.2207	27.309
-28.316	-8.03			25.316											8.2375	27.232
-28.197	-8.0452			25.316											8.2499	27.175
-27.921	-8.0616			25.316											8.265	27.079
-27.833	-8.0779			25.316											8.2807	27.02
-27.625	-8.0945			25.316											8.2973	27.032
-27.417	-8.11			25.316											8.3134	27.08
-27.335	-8.1251			25.316											8.325	27.127
-27.284	-8.1376			25.316											8.3406	27.114
-27.266	-8.1538			25.316											8.3574	27.078
-27.298	-8.1697			25.316											8.3736	27.039
-27.31	-8.1897			25.316											8.3898	26.948
-27.336	-8.205			25.316											8.4098	26.884
-27.309	-8.2207			25.316											8.425	26.808
-27.232	-8.2375			25.316											8.4408	26.739
-27.175	-8.2499			25.316											8.4577	26.618
-27.079	-8.265			25.316											8.474	26.48
-27.02	-8.2807			25.316											8.49	26.421
-27.032	-8.2973			25.316											8.5139	26.238
-27.08	-8.3134			25.316											8.53	26.144
-27.127	-8.325			25.316											8.545	26.055
-27.114	-8.3406			25.316											8.561	25.982
-27.078	-8.3574			25.316											8.5776	25.944
-27.039	-8.3736			25.316											8.5938	25.902
-26.948	-8.3898			25.316											8.61	25.732
-26.884	-8.4098			25.316											8.6254	25.462
-26.808	-8.425			25.316											8.6379	25.322
-26.739	-8.4408			25.316											8.654	25.219
-26.618	-8.4577			25.316											8.6742	25.03
-26.48	-8.474			25.316											8.69	24.901
-26.421	-8.49			25.316											8.7058	24.774
-26.238	-8.5139			25.316											8.722	24.635
-26.144	-8.53			25.316											8.7349	24.511
-26.055	-8.545			25.316											8.7506	24.196
-25.982	-8.561			25.316											8.7677	23.35
-25.944	-8.5776			25.316											8.7834	22.59
-25.902	-8.5938			25.316											8.7998	22.055
-25.732	-8.61			25.316											8.815	21.624
-25.462	-8.6254			25.316											8.8305	21.245
-25.322	-8.6379			25.316											8.8504	20.898
-25.219	-8.654			25.316											8.8665	20.608
-25.03	-8.6742			25.316											8.8823	20.344
-24.901	-8.69			25.316											8.895	20.184
-24.774	-8.7058			25.316											8.9102	19.911
-24.635	-8.722			25.316											8.9264	19.66
-24.511	-8.7349			25.316											8.9423	19.374
-24.196	-8.7506			25.316											8.9588	19.117
-23.35	-8.7677			25.316											8.9749	18.992
-22.59	-8.7834			25.316											8.99	18.954
-22.055	-8.7998			25.316											9.0056	18.904
-21.624	-8.815			25.316											9.0256	18.845
-21.245	-8.8305			25.316											9.0415	18.76
-20.898	-8.8504			25.316											9.0583	18.679
-20.608	-8.8665			25.316											9.0743	18.66
-20.344	-8.8823			25.316											9.09	18.714
-20.184	-8.895			25.316											9.1011	18.732
-19.911	-8.9102			25.316											9.1178	18.794
-19.66	-8.9264			25.316											9.1339	18.895
-19.374	-8.9423			25.316											9.1499	19.014
-19.117	-8.9588			25.316											9.1738	19.179
-18.992	-8.9749			25.316											9.1899	19.271
-18.954	-8.99			25.316											9.205	19.355
-18.904	-9.0056			25.316											9.2209	19.439
-18.845	-9.0256			25.316											9.2375	19.499
-18.76	-9.0415			25.316											9.2539	19.509
-18.679	-9.0583			25.316											9.27	19.475
-18.66	-9.0743			25.316											9.29	19.453
-18.714	-9.09			25.316											9.3052	19.388
-18.732	-9.1011			25.316											9.3178	19.358
-18.794	-9.1178			25.316											9.3339	19.357
-18.895	-9.1339			25.316											9.35	19.372
-19.014	-9.1499			25.316											9.3611	19.338
-19.179	-9.1738			25.316											9.3778	19.295
-19.271	-9.1899			25.316											9.3943	19.187
-19.355	-9.205			25.316											9.41	18.978
-19.439	-9.2209			25.316											9.4258	18.752
-19.499	-9.2375			25.316											9.4417	18.574
-19.509	-9.2539			25.316											9.4583	18.405
-19.475	-9.27			25.316											9.4748	18.163
-19.453	-9.29			25.316											9.49	17.959
-19.388	-9.3052			25.316											9.51	17.834
-19.358	-9.3178			25.316											9.5254	17.803
-19.357	-9.3339			25.316											9.5381	17.774
-19.372	-9.35			25.316											9.5543	17.706
-19.338	-9.3611			25.316											9.57	17.628
-19.295	-9.3778			25.316											9.5853	17.639
-19.187	-9.3943			25.316											9.6012	17.64
-18.978	-9.41			25.316											9.6178	17.58
-18.752	-9.4258			25.316											9.6345	17.598
-18.574	-9.4417			25.316											9.65	17.545
-18.405	-9.4583			25.316											9.6654	17.45
-18.163	-9.4748			25.316											9.6853	17.396
-17.959	-9.49			25.316											9.6978	17.364
-17.834	-9.51			25.316											9.71	17.366
-17.803	-9.5254			25.316											9.73	17.369
-17.774	-9.5381			25.316											9.7453	17.314
-17.706	-9.5543			25.316											9.7611	17.275
-17.628	-9.57			25.316											9.7777	17.247
-17.639	-9.5853			25.316											9.794	17.238
-17.64	-9.6012			25.316											9.81	17.268
-17.58	-9.6178			25.316											9.8251	17.283
-17.598	-9.6345			25.316											9.8413	17.235
-17.545	-9.65			25.316											9.858	17.167
-17.45	-9.6654			25.316											9.8701	17.111
-17.396	-9.6853			25.316											9.8854	17.01
-17.364	-9.6978			25.316											9.898	16.925
-17.366	-9.71			25.316											9.91	16.802
-17.369	-9.73			25.316											9.9257	16.592
-17.314	-9.7453			25.316											9.9417	16.34
-17.275	-9.7611			25.316											9.9583	16.129
-17.247	-9.7777			25.316											9.9744	15.95
-17.238	-9.794			25.316											9.9944	15.688
-17.268	-9.81			25.316											10.01	15.55
-17.283	-9.8251			25.316											10.0258	15.46
-17.235	-9.8413			25.316											10.0419	15.335
-17.167	-9.858			25.316											10.0586	15.24
-17.111	-9.8701			25.316											10.07	15.222
-17.01	-9.8854			25.316											10.086	15.188
-16.925	-9.898			25.316											10.0988	15.112
-16.802	-9.91			25.316											10.115	15.057
-16.592	-9.9257			25.316											10.126	15.056
-16.34	-9.9417			25.316											10.1419	15.046
-16.129	-9.9583			25.316											10.1586	15.032
-15.95	-9.9744			25.316											10.175	14.939
-15.688	-9.9944			25.316											10.1901	14.815
-15.55	-10.01			25.316											10.2021	14.724
-15.46	-10.0258			25.316											10.2187	14.626
-15.335	-10.0419			25.316											10.23	14.592
-15.24	-10.0586			25.316											10.2461	14.526
-15.222	-10.07			25.316											10.262	14.409
-15.188	-10.086			25.316											10.2788	14.316
-15.112	-10.0988			25.316											10.2949	14.294
-15.057	-10.115			25.316											10.3059	14.358
-15.056	-10.126			25.316											10.3218	14.402
-15.046	-10.1419			25.316											10.3348	14.397
-15.032	-10.1586			25.316											10.35	14.359
-14.939	-10.175			25.316											10.3659	14.378
-14.815	-10.1901			25.316											10.3818	14.408
-14.724	-10.2021			25.316											10.3985	14.406
-14.626	-10.2187			25.316											10.4149	14.359
-14.592	-10.23			25.316											10.426	14.315
-14.526	-10.2461			25.316											10.4386	14.267
-14.409	-10.262			25.316											10.4548	14.27
-14.316	-10.2788			25.316											10.47	14.329
-14.294	-10.2949			25.316											10.4857	14.398
-14.358	-10.3059			25.316											10.5016	14.478
-14.402	-10.3218			25.316											10.5182	14.574
-14.397	-10.3348			25.316											10.53	14.629
-14.359	-10.35			25.316											10.5415	14.717
-14.378	-10.3659			25.316											10.5584	14.764
-14.408	-10.3818			25.316											10.5746	14.792
-14.406	-10.3985			25.316											10.59	14.731
-14.359	-10.4149			25.316											10.6103	14.543
-14.315	-10.426			25.316											10.6222	14.281
-14.267	-10.4386			25.316											10.635	14.13
-14.27	-10.4548			25.316											10.6501	13.906
-14.329	-10.47			25.316											10.67	13.647
-14.398	-10.4857			25.316											10.686	13.495
-14.478	-10.5016			25.316											10.7017	13.431
-14.574	-10.5182			25.316											10.7183	13.358
-14.629	-10.53			25.316											10.7347	13.282
-14.717	-10.5415			25.316											10.75	13.217
-14.764	-10.5584			25.316											10.7655	13.126
-14.792	-10.5746			25.316											10.7814	13.07
-14.731	-10.59			25.316											10.8011	13.023
-14.543	-10.6103			25.316											10.8135	12.997
-14.281	-10.6222			25.316											10.825	13.086
-14.13	-10.635			25.316											10.845	13.121
-13.906	-10.6501			25.316											10.8615	13.165
-13.647	-10.67			25.316											10.8785	13.118
-13.495	-10.686			25.316											10.895	13.045
-13.431	-10.7017			25.316											10.91	12.932
-13.358	-10.7183			25.316											10.925	12.895
-13.282	-10.7347			25.316											10.9409	12.818
-13.217	-10.75			25.316											10.9579	12.587
-13.126	-10.7655			25.316											10.9748	12.346
-13.07	-10.7814			25.316											10.986	12.154
-13.023	-10.8011			25.316											11.0017	12.001
-12.997	-10.8135			25.316											11.0215	11.874
-13.086	-10.825			25.316											11.0346	11.727
-13.121	-10.845			25.316											11.0456	11.636
-13.165	-10.8615			25.316											11.0656	11.485
-13.118	-10.8785			25.316											11.0812	11.422
-13.045	-10.895			25.316											11.0979	11.377
-12.932	-10.91			25.316											11.1141	11.297
-12.895	-10.925			25.316											11.1299	11.195
-12.818	-10.9409			25.316											11.1456	11.164
-12.587	-10.9579			25.316											11.1612	11.243
-12.346	-10.9748			25.316											11.1776	11.313
-12.154	-10.986			25.316											11.1975	11.367
-12.001	-11.0017			25.316											11.2138	11.37
-11.874	-11.0215			25.316											11.2299	11.356
-11.727	-11.0346			25.316											11.2451	11.331
-11.636	-11.0456			25.316											11.2605	11.421
-11.485	-11.0656			25.316											11.2769	11.594
-11.422	-11.0812			25.316											11.2932	11.785
-11.377	-11.0979			25.316											11.31	11.8
-11.297	-11.1141			25.316											11.33	11.517
-11.195	-11.1299			25.316											11.342	11.375
-11.164	-11.1456			25.316											11.3547	11.256
-11.243	-11.1612			25.316											11.374	11.199
-11.313	-11.1776			25.316											11.3899	11.195
-11.367	-11.1975			25.316											11.405	11.201
-11.37	-11.2138			25.316											11.4209	11.145
-11.356	-11.2299			25.316											11.438	11.134
-11.331	-11.2451			25.316											11.4546	11.13
-11.421	-11.2605														11.47	11.195
-11.594	-11.2769														11.4856	11.13
-11.785	-11.2932														11.5054	10.817
-11.8	-11.31														11.5212	10.615
-11.517	-11.33														11.5376	10.555
-11.375	-11.342														11.55	10.45
-11.256	-11.3547														11.5651	10.256
-11.199	-11.374														11.5811	10.054
-11.195	-11.3899														11.5976	9.875
-11.201	-11.405														11.6138	9.807
-11.145	-11.4209														11.6298	9.722
-11.134	-11.438														11.645	9.641
-11.13	-11.4546														11.6607	9.566
-11.195	-11.47														11.6737	9.468
-11.13	-11.4856														11.6898	9.348
-10.817	-11.5054														11.705	9.298
-10.615	-11.5212														11.7251	9.302
-10.555	-11.5376														11.7405	9.329
-10.45	-11.55														11.757	9.413
-10.256	-11.5651														11.7734	9.538
-10.054	-11.5811														11.7896	9.649
-9.875	-11.5976														11.805	9.751
-9.807	-11.6138														11.8208	9.827
-9.722	-11.6298														11.8374	9.921
-9.641	-11.645														11.8575	9.983
-9.566	-11.6607														11.8699	9.977
-9.468	-11.6737														11.8807	9.937
-9.348	-11.6898														11.9004	10.006
-9.298	-11.705														11.917	10.112
-9.302	-11.7251														11.9334	10.195
-9.329	-11.7405														11.9496	10.22
-9.413	-11.757														11.965	10.202
-9.538	-11.7734														11.9805	10.194
-9.649	-11.7896														11.9972	10.23
-9.751	-11.805														12.0134	10.249
-9.827	-11.8208														12.0334	10.291
-9.921	-11.8374														12.0496	10.307
-9.983	-11.8575														12.065	10.378
-9.977	-11.8699														12.0804	10.49
-9.937	-11.8807														12.0971	10.607
-10.006	-11.9004														12.1133	10.702
-10.112	-11.917														12.1298	10.824
-10.195	-11.9334														12.145	10.863
-10.22	-11.9496														12.165	10.945
-10.202	-11.965														12.1773	10.939
-10.194	-11.9805														12.1896	10.97
-10.23	-11.9972														12.2096	11.037
-10.249	-12.0134														12.2251	11.073
-10.291	-12.0334														12.2407	11.11
-10.307	-12.0496														12.2607	11.168
-10.378	-12.065														12.2773	11.206
-10.49	-12.0804														12.2898	11.202
-10.607	-12.0971														12.305	11.226
-10.702	-12.1133														12.3172	11.263
-10.824	-12.1298														12.3335	11.3
-10.863	-12.145														12.3498	11.334
-10.945	-12.165														12.365	11.436
-10.939	-12.1773														12.385	11.593
-10.97	-12.1896														12.4007	11.661
-11.037	-12.2096														12.4175	11.728
-11.073	-12.2251														12.4338	11.771
-11.11	-12.2407														12.4499	11.859
-11.168	-12.2607														12.465	11.95
-11.206	-12.2773														12.4808	12.004
-11.202	-12.2898														12.4975	12.099
-11.226	-12.305														12.5174	12.184
-11.263	-12.3172														12.5336	12.32
-11.3	-12.3335														12.5497	12.449
-11.334	-12.3498														12.565	12.48
-11.436	-12.365														12.5808	12.522
-11.593	-12.385														12.5974	12.62
-11.661	-12.4007														12.6136	12.746
-11.728	-12.4175														12.6297	12.84
-11.771	-12.4338														12.6498	12.959
-11.859	-12.4499														12.665	13.018
-11.95	-12.465														12.6808	13.088
-12.004	-12.4808														12.7007	13.2
-12.099	-12.4975														12.7173	13.4
-12.184	-12.5174														12.7375	13.737
-12.32	-12.5336														12.7545	13.966
-12.449	-12.5497														12.77	14.179
-12.48	-12.565														12.7852	14.491
-12.522	-12.5808														12.8021	14.831
-12.62	-12.5974														12.815	15.024
-12.746	-12.6136														12.8303	15.296
-12.84	-12.6297														12.8464	15.577
-12.959	-12.6498														12.8706	15.941
-13.018	-12.665														12.8867	16.195
-13.088	-12.6808														12.9024	16.43
-13.2	-12.7007														12.919	16.705
-13.4	-12.7173														12.9351	16.966
-13.737	-12.7375														12.9502	17.228
-13.966	-12.7545														12.9664	17.454
-14.179	-12.77														12.979	17.628
-14.491	-12.7852														12.9951	17.889
-14.831	-12.8021														13.0103	18.115
-15.024	-12.815														13.0225	18.263
-15.296	-12.8303														13.0395	18.47
-15.577	-12.8464														13.055	18.593
-15.941	-12.8706														13.0704	18.855
-16.195	-12.8867														13.0906	19.079
-16.43	-12.9024														13.1066	19.247
-16.705	-12.919														13.122	19.388
-16.966	-12.9351														13.1427	19.592
-17.228	-12.9502														13.1598	19.641
-17.454	-12.9664														13.1797	19.741
-17.628	-12.979														13.1949	19.933
-17.889	-12.9951														13.21	20.118
-18.115	-13.0103														13.2262	20.185
-18.263	-13.0225														13.2423	20.274
-18.47	-13.0395														13.2588	20.424
-18.593	-13.055														13.275	20.626
-18.855	-13.0704														13.29	20.761
-19.079	-13.0906														13.3101	20.871
-19.247	-13.1066														13.3263	21.074
-19.388	-13.122														13.3428	21.188
-19.592	-13.1427														13.3594	21.328
-19.641	-13.1598														13.375	21.545
-19.741	-13.1797														13.3907	21.67
-19.933	-13.1949														13.4069	21.829
-20.118	-13.21														13.4228	21.991
-20.185	-13.2262														13.4388	22.053
-20.274	-13.2423														13.45	22.154
-20.424	-13.2588														13.4659	22.302
-20.626	-13.275														13.4818	22.438
-20.761	-13.29														13.5018	22.539
-20.871	-13.3101														13.5188	22.569
-21.074	-13.3263														13.535	22.609
-21.188	-13.3428														13.55	22.652
-21.328	-13.3594														13.566	22.744
-21.545	-13.375														13.582	22.766
-21.67	-13.3907														13.599	22.763
-21.829	-13.4069														13.6151	22.519
-21.991	-13.4228														13.635	22.375
-22.053	-13.4388														13.6506	22.238
-22.154	-13.45														13.6666	22.082
-22.302	-13.4659														13.6824	22.032
-22.438	-13.4818														13.6992	21.913
-22.539	-13.5018														13.715	21.864
-22.569	-13.5188														13.7308	21.823
-22.609	-13.535														13.7476	21.595
-22.652	-13.55														13.76	21.467
-22.744	-13.566														13.775	21.199
-22.766	-13.582														13.7911	20.899
-22.763	-13.599														13.8105	20.692
-22.519	-13.6151														13.8264	20.647
-22.375	-13.635														13.8422	20.605
-22.238	-13.6506														13.8589	20.586
-22.082	-13.6666														13.875	20.577
-22.032	-13.6824														13.8904	20.573
-21.913	-13.6992														13.9066	20.53
-21.864	-13.715														13.9227	20.499
-21.823	-13.7308														13.9426	20.505
-21.595	-13.7476														13.955	20.492
-21.467	-13.76														13.9663	20.504
-21.199	-13.775														13.952	10.695
-20.899	-13.7911														13.9945	9.945
-20.692	-13.8105														14.0169	10.221
-20.647	-13.8264
-20.605	-13.8422
-20.586	-13.8589
-20.577	-13.875
-20.573	-13.8904
-20.53	-13.9066
-20.499	-13.9227
-20.505	-13.9426
-20.492	-13.955
-20.504	-13.9663
-10.695	-13.952
-9.945	-13.9945
-10.221	-14.0169

## Sheet: MA112,5L100
WORKSHOP 3 EXPORTED DATA: [C:\Users\Maleki\2012-4-14\MA112,5L100.W01 - 1]					DISPLACEMENT(mm)	LOAD (KN)						DISPLACEMENT(mm)	LOAD (KN)
*************************************************************************************************				26.147	0	0						0	-0.007
Source of data: ToolKit				26.147	0.0179	0.55057						-0.005	-0.031
WS3 File Version: 1.04				26.147	0.0336	0.816751						0	-0.026
Number of bytes in subfile: 8494				26.147	0.0455	1.03366						0	0.007
Total number of data points: 1022				26.147	0.062	1.28216						-0.0039	-0.001
Test date: 14/05/2012				26.147	0.0782	1.49318						-0.0024	-0.051
Test time: 17:05:11				26.147	0.0936	1.68867						0	-0.001
Player Step: 1				26.147	0.1093	1.86648						-0.0021	-0.047
Step Capture No: 1				26.147	0.126	2.04054						0	-0.011
Actuator: 1				26.147	0.1383	2.17925						-0.005	-0.035
*************************************************************************************************				26.147	0.1536	2.36188						0	-0.027
Actuator: 1 Channel:0	Actuator: 1 Channel:1			26.147	0.1686	2.47971						-0.005	-0.011
Load Current (kN)	Stroke Current (mm)			26.147	0.1852	2.72447						-0.0007	-0.046
0.007	0			26.147	0.2022	2.9146						-0.0004	0.002
0.031	0.005	fc	26.147	26.147	0.2214	3.15185						-0.005	-0.04
0.026	0			26.147	0.238	3.35591						0	-0.006
-0.007	0			26.147	0.2529	3.55943						-0.005	-0.042
0.001	0.0039			26.147	0.2688	3.7758						-0.0048	-0.041
0.051	0.0024			26.147	0.2847	3.99324						0	-0.02
0.001	0			26.147	0.3011	4.2064						-0.0018	-0.001
0.047	0.0021			26.147	0.3177	4.45223						0	-0.007
0.011	0			26.147	0.333	4.67181						-0.005	-0.023
0.035	0.005			26.147	0.3534	4.99262						0	-0.026
0.027	0			26.147	0.365	5.18382						0	0.004
0.011	0.005			26.147	0.3768	5.36967						-0.005	-0.012
0.046	0.0007			26.147	0.397	5.68351		MAX LOAD(KN)	@ DISPLACEMENT(mm)			0	-0.038
-0.002	0.0004			26.147	0.4126	5.92827		128.637	5.9913			-0.0012	0.008
0.04	0.005			26.147	0.4286	6.17838		delta ultimate	8.2223			0.0014	0.274
0.006	0			26.147	0.4437	6.39047						0.0193	1.028
0.042	0.005			26.147	0.46	6.65665						0.035	1.525
0.041	0.0048			26.147	0.4764	6.87517						0.0469	1.93
0.02	0			26.147	0.4918	7.13599						0.0634	2.394
0.001	0.0018			26.147	0.5086	7.43056						0.0796	2.788
0.007	0			26.147	0.5286	7.76743						0.095	3.153
0.023	0.005			26.147	0.5445	8.06414						0.1107	3.485
0.026	0			26.147	0.5608	8.32229						0.1274	3.81
-0.004	0			26.147	0.5726	8.52206						0.1397	4.069
0.012	0.005			26.147	0.5886	8.78181						0.155	4.41
0.038	0			26.147	0.6042	9.04478						0.17	4.63
-0.008	0.0012			26.147	0.6207	9.34684						0.1866	5.087
-0.274	-0.0014			26.147	0.637	9.62963						0.2036	5.442
-1.028	-0.0193			26.147	0.6527	9.89955						0.2228	5.885
-1.525	-0.035			26.147	0.6686	10.1764						0.2394	6.266
-1.93	-0.0469			26.147	0.6846	10.4726						0.2543	6.646
-2.394	-0.0634			26.147	0.7042	10.8529						0.2702	7.05
-2.788	-0.0796			26.147	0.7203	11.1437						0.2861	7.456
-3.153	-0.095			26.147	0.7366	11.4238						0.3025	7.854
-3.485	-0.1107			26.147	0.7525	11.7082						0.3191	8.313
-3.81	-0.1274			26.147	0.7686	12.0044						0.3344	8.723
-4.069	-0.1397			26.147	0.7805	12.2213						0.3548	9.322
-4.41	-0.155			26.147	0.7967	12.5212						0.3664	9.679
-4.63	-0.17			26.147	0.8125	12.7842						0.3782	10.026
-5.087	-0.1866			26.147	0.8286	13.0589						0.3984	10.612
-5.442	-0.2036			26.147	0.8437	13.3669						0.414	11.069
-5.885	-0.2228			26.147	0.86	13.663						0.43	11.536
-6.266	-0.2394			26.147	0.8805	13.9715						0.4451	11.932
-6.646	-0.2543			26.147	0.8967	14.4048						0.4614	12.429
-7.05	-0.2702			26.147	0.9086	14.6705						0.4778	12.837
-7.456	-0.2861			26.147	0.9244	14.9752						0.4932	13.324
-7.854	-0.3025			26.147	0.9408	15.5156						0.51	13.874
-8.313	-0.3191			26.147	0.9572	15.9799						0.53	14.503
-8.723	-0.3344			26.147	0.9733	16.448						0.5459	15.057
-9.322	-0.3548			26.147	0.9886	16.9333						0.5622	15.539
-9.679	-0.3664			26.147	1.0048	17.4362						0.574	15.912
-10.026	-0.3782			26.147	1.0209	17.9541						0.59	16.397
-10.612	-0.3984			26.147	1.0372	18.4414						0.6056	16.888
-11.069	-0.414			26.147	1.0571	18.9197						0.6221	17.452
-11.536	-0.43			26.147	1.073	19.5961						0.6384	17.98
-11.932	-0.4451			26.147	1.0886	20.1349						0.6541	18.484
-12.429	-0.4614			26.147	1.1044	20.686						0.67	19.001
-12.837	-0.4778			26.147	1.1206	21.2355						0.686	19.554
-13.324	-0.4932			26.147	1.1367	21.7582						0.7056	20.264
-13.874	-0.51			26.147	1.1526	22.296						0.7217	20.807
-14.503	-0.53			26.147	1.1686	22.8626						0.738	21.33
-15.057	-0.5459			26.147	1.1836	23.426						0.7539	21.861
-15.539	-0.5622			26.147	1.1949	24.2262						0.77	22.414
-15.912	-0.574			26.147	1.2098	24.7987						0.7819	22.819
-16.397	-0.59			26.147	1.2286	25.3803						0.7981	23.379
-16.888	-0.6056			26.147	1.2486	26.1842						0.8139	23.87
-17.452	-0.6221			26.147	1.2646	26.8044						0.83	24.383
-17.98	-0.6384			26.147	1.2812	27.4091						0.8451	24.958
-18.484	-0.6541			26.147	1.2967	28.0887						0.8614	25.511
-19.001	-0.67			26.147	1.312	28.7014						0.8819	26.087
-19.554	-0.686			26.147	1.321	29.1733						0.8981	26.896
-20.264	-0.7056			26.147	1.3413	30.1625						0.91	27.392
-20.807	-0.7217			26.147	1.3591	30.7987						0.9258	27.961
-21.33	-0.738			26.147	1.3799	31.6728						0.9422	28.97
-21.861	-0.7539			26.147	1.3994	32.5013						0.9586	29.837
-22.414	-0.77			26.147	1.4086	32.7488						0.9747	30.711
-22.819	-0.7819			26.147	1.4281	33.7096						0.99	31.617
-23.379	-0.7981			26.147	1.447	34.3223						1.0062	32.556
-23.87	-0.8139			26.147	1.4638	34.9859						1.0223	33.523
-24.383	-0.83			26.147	1.4817	35.658						1.0386	34.433
-24.958	-0.8451			26.147	1.4986	36.2739						1.0585	35.326
-25.511	-0.8614			26.147	1.5086	36.6831						1.0744	36.589
-26.087	-0.8819			26.147	1.5247	37.3852						1.09	37.595
-26.896	-0.8981			26.147	1.5424	38.1988						1.1058	38.624
-27.392	-0.91			26.147	1.5588	38.9791						1.122	39.65
-27.961	-0.9258			26.147	1.5707	39.6127						1.1381	40.626
-28.97	-0.9422			26.147	1.5875	40.5103						1.154	41.63
-29.837	-0.9586			26.147	1.6036	41.4395						1.17	42.688
-30.711	-0.9747			26.147	1.6148	42.1604						1.185	43.74
-31.617	-0.99			26.147	1.6308	43.1303						1.1963	45.234
-32.556	-1.0062			26.147	1.6474	44.1276						1.2112	46.303
-33.523	-1.0223			26.147	1.6635	45.1569						1.23	47.389
-34.433	-1.0386			26.147	1.6786	46.2447						1.25	48.89
-35.326	-1.0585			26.147	1.6941	47.3705						1.266	50.048
-36.589	-1.0744			26.147	1.71	48.5241						1.2826	51.177
-37.595	-1.09			26.147	1.7299	49.9873						1.2981	52.446
-38.624	-1.1058			26.147	1.7467	51.1463						1.3134	53.59
-39.65	-1.122			26.147	1.7629	52.301						1.3224	54.471
-40.626	-1.1381			26.147	1.7786	53.4616						1.3427	56.318
-41.63	-1.154			26.147	1.7938	54.6414						1.3605	57.506
-42.688	-1.17			26.147	1.8096	55.8267						1.3813	59.138
-43.74	-1.185			26.147	1.8224	56.7178						1.4008	60.685
-45.234	-1.1963			26.147	1.8385	57.9202						1.41	61.147
-46.303	-1.2112			26.147	1.8536	59.0921						1.4295	62.941
-47.389	-1.23			26.147	1.8695	60.2575						1.4484	64.085
-48.89	-1.25			26.147	1.8861	61.4368						1.4652	65.324
-50.048	-1.266			26.147	1.906	62.8925						1.4831	66.579
-51.177	-1.2826			26.147	1.9222	64.0525						1.5	67.729
-52.446	-1.2981			26.147	1.9383	65.1955						1.51	68.493
-53.59	-1.3134			26.147	1.9536	66.3336						1.5261	69.804
-54.471	-1.3224			26.147	1.9692	67.4631						1.5438	71.323
-56.318	-1.3427			26.147	1.9857	68.5937						1.5602	72.78
-57.506	-1.3605			26.147	2.0019	69.7302						1.5721	73.963
-59.138	-1.3813			26.147	2.0181	70.8575						1.5889	75.639
-60.685	-1.4008			26.147	2.0336	71.9357						1.605	77.374
-61.147	-1.41			26.147	2.0457	72.7224						1.6162	78.72
-62.941	-1.4295			26.147	2.0619	73.7571						1.6322	80.531
-64.085	-1.4484			26.147	2.0781	74.7774						1.6488	82.393
-65.324	-1.4652			26.147	2.0891	75.5133						1.6649	84.315
-66.579	-1.4831			26.147	2.1056	76.5127						1.68	86.346
-67.729	-1.5			26.147	2.1256	77.7745						1.6955	88.448
-68.493	-1.51			26.147	2.138	78.5066						1.7114	90.602
-69.804	-1.5261			26.147	2.1491	79.1847						1.7313	93.334
-71.323	-1.5438			26.147	2.1736	80.5884						1.7481	95.498
-72.78	-1.5602			26.147	2.1857	81.2675						1.7643	97.654
-73.963	-1.5721			26.147	2.2019	82.1721						1.78	99.821
-75.639	-1.5889			26.147	2.2136	82.8458						1.7952	102.024
-77.374	-1.605			26.147	2.2292	83.7161						1.811	104.237
-78.72	-1.6162			26.147	2.2421	84.3128						1.8238	105.901
-80.531	-1.6322			26.147	2.2585	85.0385						1.8399	108.146
-82.393	-1.6488			26.147	2.2695	85.5869						1.855	110.334
-84.315	-1.6649			26.147	2.282	86.1021						1.8709	112.51
-86.346	-1.68			26.147	2.2986	86.7405						1.8875	114.712
-88.448	-1.6955			26.147	2.3136	87.5032						1.9074	117.43
-90.602	-1.7114			26.147	2.3286	88.0597						1.9236	119.596
-93.334	-1.7313			26.147	2.3447	89.0135						1.9397	121.73
-95.498	-1.7481			26.147	2.362	89.8088						1.955	123.855
-97.654	-1.7643			26.147	2.3786	90.5179						1.9706	125.964
-99.821	-1.78			26.147	2.3946	91.1879						1.9871	128.075
-102.024	-1.7952			26.147	2.4109	91.8322						2.0033	130.197
-104.237	-1.811			26.147	2.4318	92.7208						2.0195	132.302
-105.901	-1.8238			26.147	2.4486	93.3083						2.035	134.315
-108.146	-1.8399			26.147	2.46	93.733						2.0471	135.784
-110.334	-1.855			26.147	2.476	94.3366						2.0633	137.716
-112.51	-1.8709			26.147	2.4883	94.7811						2.0795	139.621
-114.712	-1.8875			26.147	2.4993	95.2406						2.0905	140.995
-117.43	-1.9074			26.147	2.5192	95.9958						2.107	142.861
-119.596	-1.9236			26.147	2.5351	96.5935						2.127	145.217
-121.73	-1.9397			26.147	2.5511	97.1848						2.1394	146.584
-123.855	-1.955			26.147	2.5636	97.6293						2.1505	147.85
-125.964	-1.9706			26.147	2.5789	98.197						2.175	150.471
-128.075	-1.9871			26.147	2.5912	98.5949						2.1871	151.739
-130.197	-2.0033			26.147	2.6079	99.1144						2.2033	153.428
-132.302	-2.0195			26.147	2.6236	99.6307						2.215	154.686
-134.315	-2.035			26.147	2.6389	100.149						2.2306	156.311
-135.784	-2.0471			26.147	2.6552	100.658						2.2435	157.425
-137.716	-2.0633			26.147	2.668	101.008						2.2599	158.78
-139.621	-2.0795			26.147	2.6836	101.468						2.2709	159.804
-140.995	-2.0905			26.147	2.6955	101.825						2.2834	160.766
-142.861	-2.107			26.147	2.7116	102.276						2.3	161.958
-145.217	-2.127			26.147	2.7286	102.768						2.315	163.382
-146.584	-2.1394			26.147	2.745	103.254						2.33	164.421
-147.85	-2.1505			26.147	2.7619	103.663						2.3461	166.202
-150.471	-2.175			26.147	2.7736	103.93						2.3634	167.687
-151.739	-2.1871			26.147	2.7897	104.253						2.38	169.011
-153.428	-2.2033			26.147	2.8026	104.523						2.396	170.262
-154.686	-2.215			26.147	2.8186	104.925						2.4123	171.465
-156.311	-2.2306			26.147	2.8337	105.322						2.4332	173.124
-157.425	-2.2435			26.147	2.8499	105.711						2.45	174.221
-158.78	-2.2599			26.147	2.8665	106.11						2.4614	175.014
-159.804	-2.2709			26.147	2.8786	106.405						2.4774	176.141
-160.766	-2.2834			26.147	2.8938	106.806						2.4897	176.971
-161.958	-2.3			26.147	2.9065	107.082						2.5007	177.829
-163.382	-2.315			26.147	2.9227	107.452						2.5206	179.239
-164.421	-2.33			26.147	2.9386	107.829						2.5365	180.355
-166.202	-2.3461			26.147	2.954	108.181						2.5525	181.459
-167.687	-2.3634			26.147	2.9701	108.52						2.565	182.289
-169.011	-2.38			26.147	2.9828	108.804						2.5803	183.349
-170.262	-2.396			26.147	2.9986	109.141						2.5926	184.092
-171.465	-2.4123			26.147	3.014	109.457						2.6093	185.062
-173.124	-2.4332			26.147	3.0301	109.775						2.625	186.026
-174.221	-2.45			26.147	3.0502	110.126						2.6403	186.993
-175.014	-2.4614			26.147	3.0667	110.416						2.6566	187.944
-176.141	-2.4774			26.147	3.083	110.716						2.6694	188.597
-176.971	-2.4897			26.147	3.0986	111.002						2.685	189.456
-177.829	-2.5007			26.147	3.1141	111.273						2.6969	190.123
-179.239	-2.5206			26.147	3.1303	111.492						2.713	190.965
-180.355	-2.5365			26.147	3.147	111.739						2.73	191.884
-181.459	-2.5525			26.147	3.1703	112.122						2.7464	192.791
-182.289	-2.565			26.147	3.1834	112.267						2.7633	193.554
-183.349	-2.5803			26.147	3.1986	112.402						2.775	194.053
-184.092	-2.5926			26.147	3.2107	112.511						2.7911	194.657
-185.062	-2.6093			26.147	3.2273	112.711						2.804	195.16
-186.026	-2.625			26.147	3.2386	112.894						2.82	195.912
-186.993	-2.6403			26.147	3.2508	113.059						2.8351	196.652
-187.944	-2.6566			26.147	3.2674	113.305						2.8513	197.379
-188.597	-2.6694			26.147	3.2786	113.495						2.8679	198.124
-189.456	-2.685			26.147	3.2948	113.744						2.88	198.675
-190.123	-2.6969			26.147	3.3075	113.927						2.8952	199.424
-190.965	-2.713			26.147	3.3236	114.114						2.9079	199.938
-191.884	-2.73			26.147	3.3349	114.357						2.9241	200.629
-192.791	-2.7464			26.147	3.3475	114.543						2.94	201.334
-193.554	-2.7633			26.147	3.3636	114.795						2.9554	201.991
-194.053	-2.775			26.147	3.375	114.964						2.9715	202.623
-194.657	-2.7911			26.147	3.3911	115.181						2.9842	203.153
-195.16	-2.804			26.147	3.4036	115.363						3	203.784
-195.912	-2.82			26.147	3.4193	115.531						3.0154	204.374
-196.652	-2.8351			26.147	3.4315	115.646						3.0315	204.967
-197.379	-2.8513			26.147	3.4482	115.779						3.0516	205.623
-198.124	-2.8679			26.147	3.4594	115.908						3.0681	206.163
-198.675	-2.88			26.147	3.4716	116.042						3.0844	206.724
-199.424	-2.8952			26.147	3.4882	116.219						3.1	207.258
-199.938	-2.9079			26.147	3.4993	116.357						3.1155	207.764
-200.629	-2.9241			26.147	3.5154	116.529						3.1317	208.172
-201.334	-2.94			26.147	3.5281	116.671						3.1484	208.634
-201.991	-2.9554			26.147	3.5392	116.816						3.1717	209.349
-202.623	-2.9715			26.147	3.5554	116.999						3.1848	209.62
-203.153	-2.9842			26.147	3.568	117.156						3.2	209.872
-203.784	-3			26.147	3.5836	117.358						3.2121	210.076
-204.374	-3.0154			26.147	3.5954	117.485						3.2287	210.449
-204.967	-3.0315			26.147	3.6116	117.611						3.24	210.79
-205.623	-3.0516			26.147	3.6236	117.752						3.2522	211.099
-206.163	-3.0681			26.147	3.6392	117.959						3.2688	211.558
-206.724	-3.0844			26.147	3.6514	118.116						3.28	211.913
-207.258	-3.1			26.147	3.6682	118.256						3.2962	212.377
-207.764	-3.1155			26.147	3.6793	118.447						3.3089	212.72
-208.172	-3.1317			26.147	3.6915	118.587						3.325	213.069
-208.634	-3.1484			26.147	3.7082	118.749						3.3363	213.523
-209.349	-3.1717			26.147	3.7194	118.896						3.3489	213.87
-209.62	-3.1848			26.147	3.7356	119.053						3.365	214.34
-209.872	-3.2			26.147	3.7483	119.162						3.3764	214.655
-210.076	-3.2121			26.147	3.7595	119.28						3.3925	215.061
-210.449	-3.2287			26.147	3.7758	119.394						3.405	215.401
-210.79	-3.24			26.147	3.7886	119.461						3.4207	215.714
-211.099	-3.2522			26.147	3.8036	119.579						3.4329	215.929
-211.558	-3.2688			26.147	3.8159	119.665						3.4496	216.178
-211.913	-3.28			26.147	3.8318	119.802						3.4608	216.418
-212.377	-3.2962			26.147	3.8436	119.922						3.473	216.669
-212.72	-3.3089			26.147	3.8593	120.093						3.4896	216.999
-213.069	-3.325			26.147	3.8716	120.189						3.5007	217.256
-213.523	-3.3363			26.147	3.8883	120.298						3.5168	217.577
-213.87	-3.3489			26.147	3.8995	120.442						3.5295	217.842
-214.34	-3.365			26.147	3.9116	120.548						3.5406	218.113
-214.655	-3.3764			26.147	3.9282	120.71						3.5568	218.455
-215.061	-3.3925			26.147	3.9395	120.82						3.5694	218.748
-215.401	-3.405			26.147	3.9557	120.952						3.585	219.126
-215.714	-3.4207			26.147	3.9682	121.048						3.5968	219.363
-215.929	-3.4329			26.147	3.9793	121.178						3.613	219.598
-216.178	-3.4496			26.147	3.9955	121.323						3.625	219.862
-216.418	-3.4608			26.147	4.0082	121.429						3.6406	220.248
-216.669	-3.473			26.147	4.0236	121.531						3.6528	220.54
-216.999	-3.4896			26.147	4.0357	121.635						3.6696	220.802
-217.256	-3.5007			26.147	4.0518	121.751						3.6807	221.158
-217.577	-3.5168			26.147	4.0636	121.847						3.6929	221.421
-217.842	-3.5295			26.147	4.0795	121.972						3.7096	221.723
-218.113	-3.5406			26.147	4.0917	122.05						3.7208	221.997
-218.455	-3.5568			26.147	4.1036	122.13						3.737	222.291
-218.748	-3.5694			26.147	4.1197	122.205						3.7497	222.494
-219.126	-3.585			26.147	4.132	122.261						3.7609	222.715
-219.363	-3.5968			26.147	4.1485	122.363						3.7772	222.928
-219.598	-3.613			26.147	4.1596	122.455						3.79	223.052
-219.862	-3.625			26.147	4.1757	122.576						3.805	223.272
-220.248	-3.6406			26.147	4.1884	122.642						3.8173	223.434
-220.54	-3.6528			26.147	4.1996	122.711						3.8332	223.689
-220.802	-3.6696			26.147	4.2158	122.813						3.845	223.912
-221.158	-3.6807			26.147	4.2283	122.891						3.8607	224.233
-221.421	-3.6929			26.147	4.2436	123.022						3.873	224.412
-221.723	-3.7096			26.147	4.2556	123.119						3.8897	224.615
-221.997	-3.7208			26.147	4.2717	123.252						3.9009	224.884
-222.291	-3.737			26.147	4.2836	123.344						3.913	225.082
-222.494	-3.7497			26.147	4.2994	123.483						3.9296	225.385
-222.715	-3.7609			26.147	4.3115	123.586						3.9409	225.59
-222.928	-3.7772			26.147	4.3236	123.68						3.9571	225.837
-223.052	-3.79			26.147	4.3397	123.766						3.9696	226.016
-223.272	-3.805			26.147	4.3523	123.742						3.9807	226.258
-223.434	-3.8173			26.147	4.3686	123.776						3.9969	226.529
-223.689	-3.8332			26.147	4.3797	123.835						4.0096	226.726
-223.912	-3.845			26.147	4.3957	123.966						4.025	226.917
-224.233	-3.8607			26.147	4.4083	124.045						4.0371	227.112
-224.412	-3.873			26.147	4.4194	124.15						4.0532	227.328
-224.615	-3.8897			26.147	4.4354	124.286						4.065	227.507
-224.884	-3.9009			26.147	4.4481	124.39						4.0809	227.741
-225.082	-3.913			26.147	4.4636	124.547						4.0931	227.886
-225.385	-3.9296			26.147	4.4753	124.663						4.105	228.035
-225.59	-3.9409			26.147	4.4914	124.793						4.1211	228.176
-225.837	-3.9571			26.147	4.5036	124.907						4.1334	228.28
-226.016	-3.9696			26.147	4.5192	125.043						4.1499	228.47
-226.258	-3.9807			26.147	4.5314	125.152						4.161	228.643
-226.529	-3.9969			26.147	4.5436	125.238						4.1771	228.869
-226.726	-4.0096			26.147	4.5594	125.325						4.1898	228.992
-226.917	-4.025			26.147	4.5719	125.348						4.201	229.121
-227.112	-4.0371			26.147	4.5886	125.393						4.2172	229.31
-227.328	-4.0532			26.147	4.5994	125.465						4.2297	229.457
-227.507	-4.065			26.147	4.6155	125.603						4.245	229.702
-227.741	-4.0809			26.147	4.6282	125.675						4.257	229.883
-227.886	-4.0931			26.147	4.6394	125.754						4.2731	230.13
-228.035	-4.105			26.147	4.6556	125.878						4.285	230.302
-228.176	-4.1211			26.147	4.6683	125.946						4.3008	230.562
-228.28	-4.1334			26.147	4.6836	126.007						4.3129	230.755
-228.47	-4.1499			26.147	4.6957	126.092						4.325	230.93
-228.643	-4.161			26.147	4.7116	126.213						4.3411	231.09
-228.869	-4.1771			26.147	4.7236	126.317						4.3537	231.045
-228.992	-4.1898			26.147	4.7393	126.422						4.37	231.109
-229.121	-4.201			26.147	4.7516	126.495						4.3811	231.219
-229.31	-4.2172			26.147	4.7636	126.586						4.3971	231.463
-229.457	-4.2297			26.147	4.7793	126.688						4.4097	231.611
-229.702	-4.245			26.147	4.7915	126.759						4.4208	231.807
-229.883	-4.257			26.147	4.8081	126.866						4.4368	232.062
-230.13	-4.2731			26.147	4.8193	126.932						4.4495	232.255
-230.302	-4.285			26.147	4.8357	126.959						4.465	232.549
-230.562	-4.3008			26.147	4.8483	126.999						4.4767	232.766
-230.755	-4.3129			26.147	4.8594	127.06						4.4928	233.007
-230.93	-4.325			26.147	4.8755	127.142						4.505	233.22
-231.09	-4.3411			26.147	4.8881	127.211						4.5206	233.474
-231.045	-4.3537			26.147	4.9036	127.327						4.5328	233.679
-231.109	-4.37			26.147	4.9153	127.426						4.545	233.839
-231.219	-4.3811			26.147	4.9314	127.528						4.5608	234.002
-231.463	-4.3971			26.147	4.9436	127.575						4.5733	234.045
-231.611	-4.4097			26.147	4.9592	127.633						4.59	234.129
-231.807	-4.4208			26.147	4.9714	127.655						4.6008	234.262
-232.062	-4.4368			26.147	4.9836	127.685						4.6169	234.52
-232.255	-4.4495			26.147	4.9993	127.713						4.6296	234.654
-232.549	-4.465			26.147	5.0115	127.683						4.6408	234.803
-232.766	-4.4767			26.147	5.0281	127.675						4.657	235.034
-233.007	-4.4928			26.147	5.0394	127.674						4.6697	235.16
-233.22	-4.505			26.147	5.0555	127.7						4.685	235.274
-233.474	-4.5206			26.147	5.068	127.738						4.6971	235.433
-233.679	-4.5328			26.147	5.0792	127.78						4.713	235.66
-233.839	-4.545			26.147	5.0954	127.832						4.725	235.853
-234.002	-4.5608			26.147	5.1081	127.862						4.7407	236.049
-234.045	-4.5733			26.147	5.1236	127.869						4.753	236.186
-234.129	-4.59			26.147	5.1358	127.808						4.765	236.356
-234.262	-4.6008			26.147	5.152	127.709						4.7807	236.547
-234.52	-4.6169			26.147	5.1636	127.713						4.7929	236.678
-234.654	-4.6296			26.147	5.1791	127.777						4.8095	236.879
-234.803	-4.6408			26.147	5.1913	127.827						4.8207	237.001
-235.034	-4.657			26.147	5.2036	127.838						4.8371	237.053
-235.16	-4.6697			26.147	5.2191	127.877						4.8497	237.127
-235.274	-4.685			26.147	5.2314	127.89						4.8608	237.24
-235.433	-4.6971			26.147	5.2481	127.936						4.8769	237.394
-235.66	-4.713			26.147	5.2681	128.003						4.8895	237.523
-235.853	-4.725			26.147	5.2836	128.035						4.905	237.739
-236.049	-4.7407			26.147	5.2997	128.022						4.9167	237.924
-236.186	-4.753			26.147	5.3157	128.057						4.9328	238.114
-236.356	-4.765			26.147	5.3316	128.101						4.945	238.202
-236.547	-4.7807			26.147	5.3482	128.147						4.9606	238.311
-236.678	-4.7929			26.147	5.3717	128.184						4.9728	238.352
-236.879	-4.8095			26.147	5.3883	128.178						4.985	238.407
-237.001	-4.8207			26.147	5.4036	128.276						5.0007	238.46
-237.053	-4.8371			26.147	5.4191	128.362						5.0129	238.404
-237.127	-4.8497			26.147	5.4353	128.429						5.0295	238.389
-237.24	-4.8608			26.147	5.4514	128.455						5.0408	238.387
-237.394	-4.8769			26.147	5.468	128.48						5.0569	238.435
-237.523	-4.8895			26.147	5.4836	128.527						5.0694	238.507
-237.739	-4.905			26.147	5.4953	128.574						5.0806	238.585
-237.924	-4.9167			26.147	5.5113	128.618						5.0968	238.682
-238.114	-4.9328			26.147	5.5316	128.628						5.1095	238.739
-238.202	-4.945			26.147	5.5486	128.558						5.125	238.751
-238.311	-4.9606			26.147	5.5636	128.504						5.1372	238.637
-238.352	-4.9728			26.147	5.5797	128.489						5.1534	238.453
-238.407	-4.985			26.147	5.5918	128.479						5.165	238.46
-238.46	-5.0007			26.147	5.6082	128.501						5.1805	238.579
-238.404	-5.0129			26.147	5.6236	128.518						5.1927	238.672
-238.389	-5.0295			26.147	5.6393	128.542						5.205	238.693
-238.387	-5.0408			26.147	5.6555	128.553						5.2205	238.766
-238.435	-5.0569			26.147	5.6715	128.554						5.2328	238.791
-238.507	-5.0694			26.147	5.6882	128.502						5.2495	238.877
-238.585	-5.0806			26.147	5.7036	128.435						5.2695	239.002
-238.682	-5.0968			26.147	5.7156	128.432						5.285	239.061
-238.739	-5.1095			26.147	5.7317	128.398						5.3011	239.036
-238.751	-5.125			26.147	5.7515	128.411						5.3171	239.103
-238.637	-5.1372			26.147	5.768	128.441						5.333	239.184
-238.453	-5.1534			26.147	5.7836	128.486						5.3496	239.271
-238.46	-5.165			26.147	5.7993	128.482						5.3731	239.339
-238.579	-5.1805			26.147	5.8154	128.495						5.3897	239.329
-238.672	-5.1927			26.147	5.8313	128.506						5.405	239.511
-238.693	-5.205			26.147	5.8479	128.496						5.4205	239.672
-238.766	-5.2205			26.147	5.859	128.501						5.4367	239.797
-238.791	-5.2328			26.147	5.8752	128.498						5.4528	239.846
-238.877	-5.2495			26.147	5.8914	128.496						5.4694	239.892
-239.002	-5.2695			26.147	5.9079	128.508						5.485	239.979
-239.061	-5.285			26.147	5.9278	128.537						5.4967	240.067
-239.036	-5.3011			26.147	5.9436	128.569						5.5127	240.15
-239.103	-5.3171			26.147	5.959	128.583						5.533	240.169
-239.184	-5.333			26.147	5.9752	128.612						5.55	240.038
-239.271	-5.3496			26.147	5.9913	128.637						5.565	239.937
-239.339	-5.3731			26.147	6.008	128.636						5.5811	239.909
-239.329	-5.3897			26.147	6.0236	128.604						5.5932	239.89
-239.511	-5.405			26.147	6.0393	128.59						5.6096	239.931
-239.672	-5.4205			26.147	6.0593	128.567						5.625	239.963
-239.797	-5.4367			26.147	6.0754	128.554						5.6407	240.008
-239.846	-5.4528			26.147	6.0914	128.531						5.6569	240.028
-239.892	-5.4694			26.147	6.108	128.477						5.6729	240.03
-239.979	-5.485			26.147	6.1236	128.368						5.6896	239.933
-240.067	-5.4967			26.147	6.1479	128.261						5.705	239.808
-240.15	-5.5127			26.147	6.1636	128.256						5.717	239.803
-240.169	-5.533			26.147	6.1789	128.241						5.7331	239.739
-240.038	-5.55			26.147	6.1951	128.21						5.7529	239.763
-239.937	-5.565			26.147	6.2111	128.197						5.7694	239.82
-239.909	-5.5811			26.147	6.2277	128.127						5.785	239.904
-239.89	-5.5932			26.147	6.2436	128.112						5.8007	239.895
-239.931	-5.6096			26.147	6.2588	128.09						5.8168	239.92
-239.963	-5.625			26.147	6.2788	128.089						5.8327	239.94
-240.008	-5.6407			26.147	6.2951	128.084						5.8493	239.922
-240.028	-5.6569			26.147	6.3112	128.073						5.8604	239.931
-240.03	-5.6729			26.147	6.3278	128.06						5.8766	239.926
-239.933	-5.6896			26.147	6.3436	128.071						5.8928	239.921
-239.808	-5.705			26.147	6.3588	128.069						5.9093	239.945
-239.803	-5.717			26.147	6.3749	128.071						5.9292	239.999
-239.739	-5.7331			26.147	6.391	128.069						5.945	240.059
-239.763	-5.7529			26.147	6.411	128.062						5.9604	240.084
-239.82	-5.7694			26.147	6.4276	128.031						5.9766	240.139
-239.904	-5.785			26.147	6.4387	128.023						5.9927	240.186
-239.895	-5.8007			26.147	6.4549	128.008						6.0094	240.183
-239.92	-5.8168			26.147	6.471	128.005						6.025	240.124
-239.94	-5.8327			26.147	6.4875	128.001						6.0407	240.098
-239.922	-5.8493			26.147	6.5036	127.979						6.0607	240.055
-239.931	-5.8604			26.147	6.5187	127.96						6.0768	240.031
-239.926	-5.8766			26.147	6.5349	127.94						6.0928	239.988
-239.921	-5.8928			26.147	6.5509	127.899						6.1094	239.887
-239.945	-5.9093			26.147	6.5674	127.886						6.125	239.682
-239.999	-5.9292			26.147	6.5874	127.868						6.1493	239.483
-240.059	-5.945			26.147	6.6036	127.822						6.165	239.473
-240.084	-5.9604			26.147	6.6187	127.784						6.1803	239.446
-240.139	-5.9766			26.147	6.6351	127.716						6.1965	239.387
-240.186	-5.9927			26.147	6.6479	127.612						6.2125	239.363
-240.183	-6.0094			26.147	6.6636	127.513						6.2291	239.233
-240.124	-6.025			26.147	6.679	127.383						6.245	239.204
-240.098	-6.0407			26.147	6.695	127.312						6.2602	239.163
-240.055	-6.0607			26.147	6.7109	127.246						6.2802	239.162
-240.031	-6.0768			26.147	6.7274	127.177						6.2965	239.152
-239.988	-6.0928			26.147	6.7436	127.092						6.3126	239.132
-239.887	-6.1094			26.147	6.7595	126.89						6.3292	239.108
-239.682	-6.125			26.147	6.7796	126.576						6.345	239.128
-239.483	-6.1493			26.147	6.7953	126.535						6.3602	239.125
-239.473	-6.165			26.147	6.8109	126.564						6.3763	239.129
-239.446	-6.1803			26.147	6.8275	126.551						6.3924	239.124
-239.387	-6.1965			26.147	6.8436	126.517						6.4124	239.112
-239.363	-6.2125			26.147	6.8551	126.476						6.429	239.053
-239.233	-6.2291			26.147	6.8711	126.445						6.4401	239.039
-239.204	-6.245			26.147	6.8875	126.427						6.4563	239.011
-239.163	-6.2602			26.147	6.9036	126.401						6.4724	239.005
-239.162	-6.2802			26.147	6.9187	126.363						6.4889	238.998
-239.152	-6.2965			26.147	6.935	126.306						6.505	238.956
-239.132	-6.3126			26.147	6.9551	126.224						6.5201	238.921
-239.108	-6.3292			26.147	6.9712	126.145						6.5363	238.884
-239.128	-6.345			26.147	6.9877	126.062						6.5523	238.807
-239.125	-6.3602			26.147	7.0036	125.998						6.5688	238.783
-239.129	-6.3763			26.147	7.0189	125.91						6.5888	238.75
-239.124	-6.3924			26.147	7.0352	125.784						6.605	238.663
-239.112	-6.4124			26.147	7.0513	125.666						6.6201	238.593
-239.053	-6.429			26.147	7.0678	125.554						6.6365	238.466
-239.039	-6.4401			26.147	7.0789	125.509						6.6493	238.271
-239.011	-6.4563			26.147	7.0911	125.465						6.665	238.086
-239.005	-6.4724			26.147	7.1076	125.388						6.6804	237.843
-238.998	-6.4889			26.147	7.1236	125.275						6.6964	237.712
-238.956	-6.505			26.147	7.1387	125.097						6.7123	237.588
-238.921	-6.5201			26.147	7.1552	124.196						6.7288	237.46
-238.884	-6.5363			26.147	7.1709	122.857						6.745	237.3
-238.807	-6.5523			26.147	7.1828	122.223						6.7609	236.924
-238.783	-6.5688			26.147	7.1986	121.494						6.781	236.337
-238.75	-6.5888			26.147	7.2092	121.378						6.7967	236.261
-238.663	-6.605			26.147	7.2261	121.264						6.8123	236.315
-238.593	-6.6201			26.147	7.2428	121.156						6.8289	236.291
-238.466	-6.6365			26.147	7.2633	120.947						6.845	236.227
-238.271	-6.6493			26.147	7.275	120.784						6.8565	236.151
-238.086	-6.665			26.147	7.2876	120.588						6.8725	236.093
-237.843	-6.6804			26.147	7.3036	120.347						6.8889	236.058
-237.712	-6.6964			26.147	7.315	119.788						6.905	236.01
-237.588	-6.7123			26.147	7.3311	118.858						6.9201	235.94
-237.46	-6.7288			26.147	7.3505	118.117						6.9364	235.832
-237.3	-6.745			26.147	7.3669	117.427						6.9565	235.68
-236.924	-6.7609			26.147	7.3786	116.894						6.9726	235.533
-236.337	-6.781			26.147	7.3941	116.604						6.9891	235.377
-236.261	-6.7967			26.147	7.4071	116.469						7.005	235.257
-236.315	-6.8123			26.147	7.4186	116.304						7.0203	235.093
-236.291	-6.8289			26.147	7.4388	115.866						7.0366	234.858
-236.227	-6.845			26.147	7.455	115.521						7.0527	234.638
-236.151	-6.8565			26.147	7.4712	115.124						7.0692	234.429
-236.093	-6.8725			26.147	7.4836	114.85						7.0803	234.345
-236.058	-6.8889			26.147	7.4991	114.209						7.0925	234.262
-236.01	-6.905			26.147	7.5115	113.753						7.109	234.119
-235.94	-6.9201			26.147	7.6806	102.129						7.125	233.907
-235.832	-6.9364			26.147	7.6203	81.8572						7.1401	233.576
-235.68	-6.9565			26.147	7.5957	76.2845						7.1566	231.893
-235.533	-6.9726			26.147	7.5886	75.8571						7.1723	229.393
-235.377	-6.9891			26.147	7.5953	75.9814						7.1842	228.209
-235.257	-7.005			26.147	7.5986	78.0508						7.2	226.848
-235.093	-7.0203			26.147	7.6136	80.5686						7.2106	226.631
-234.858	-7.0366			26.147	7.6286	83.7087						7.2275	226.418
-234.638	-7.0527			26.147	7.6391	86.5681						7.2442	226.217
-234.429	-7.0692			26.147	7.6598	89.5818						7.2647	225.826
-234.345	-7.0803			26.147	7.6707	92.3041						7.2764	225.522
-234.262	-7.0925			26.147	7.6886	93.6607						7.289	225.157
-234.119	-7.109			26.147	7.7065	95.45						7.305	224.706
-233.907	-7.125			26.147	7.7236	95.118						7.3164	223.662
-233.576	-7.1401			26.147	7.7442	95.0462						7.3325	221.926
-231.893	-7.1566			26.147	7.7806	93.4406						7.3519	220.542
-229.393	-7.1723			26.147	7.7886	90.722						7.3683	219.255
-228.209	-7.1842			26.147	7.7946	90.6888						7.38	218.26
-226.848	-7.2			26.147	7.8094	91.2217						7.3955	217.718
-226.631	-7.2106			26.147	7.8477	88.7259						7.4085	217.465
-226.418	-7.2275			26.147	7.8636	85.7363						7.42	217.158
-226.217	-7.2442			26.147	7.8678	85.4193						7.4402	216.339
-225.826	-7.2647			26.147	7.8833	85.6796						7.4564	215.695
-225.522	-7.2764			26.147	7.9103	84.0225						7.4726	214.954
-225.157	-7.289			26.147	7.9186	83.0729						7.485	214.442
-224.706	-7.305			26.147	7.9286	83.2995						7.5005	213.246
-223.662	-7.3164			26.147	7.9436	83.6171						7.5129	212.395
-221.926	-7.3325			26.147	7.966	82.9117						7.682	190.69
-220.542	-7.3519			26.147	7.9825	81.81						7.6217	152.84
-219.255	-7.3683			26.147	7.9954	81.2439						7.5971	142.435
-218.26	-7.38			26.147	8.0169	80.5996						7.59	141.637
-217.718	-7.3955			26.147	8.0344	79.581						7.5967	141.869
-217.465	-7.4085			26.147	8.049	78.5736						7.6	145.733
-217.158	-7.42			26.147	8.0643	77.9769						7.615	150.434
-216.339	-7.4402			26.147	8.0807	77.33						7.63	156.297
-215.695	-7.4564			26.147	8.0974	76.5507						7.6405	161.636
-214.954	-7.4726			26.147	8.1136	75.6386						7.6612	167.263
-214.442	-7.485			26.147	8.1255	74.9434						7.6721	172.346
-213.246	-7.5005			26.147	8.142	73.9628						7.69	174.879
-212.395	-7.5129			26.147	8.1604	72.385						7.7079	178.22
-190.69	-7.682			26.147	8.1786	70.2406						7.725	177.6
-152.84	-7.6217			26.147	8.1958	68.3452						7.7456	177.466
-142.435	-7.5971			26.147	8.2223	64.8232						7.782	174.468
-141.637	-7.59			26.147								7.79	169.392
-141.869	-7.5967			26.147								7.796	169.33
-145.733	-7.6			26.147								7.8108	170.325
-150.434	-7.615			26.147								7.8491	165.665
-156.297	-7.63			26.147								7.865	160.083
-161.636	-7.6405			26.147								7.8692	159.491
-167.263	-7.6612			26.147								7.8847	159.977
-172.346	-7.6721			26.147								7.9117	156.883
-174.879	-7.69			26.147								7.92	155.11
-178.22	-7.7079			26.147								7.93	155.533
-177.6	-7.725			26.147								7.945	156.126
-177.466	-7.7456			26.147								7.9674	154.809
-174.468	-7.782			26.147								7.9839	152.752
-169.392	-7.79			26.147								7.9968	151.695
-169.33	-7.796			26.147								8.0183	150.492
-170.325	-7.8108			26.147								8.0358	148.59
-165.665	-7.8491			26.147								8.0504	146.709
-160.083	-7.865			26.147								8.0657	145.595
-159.491	-7.8692			26.147								8.0821	144.387
-159.977	-7.8847			26.147								8.0988	142.932
-156.883	-7.9117			26.147								8.115	141.229
-155.11	-7.92			26.147								8.1269	139.931
-155.533	-7.93			26.147								8.1434	138.1
-156.126	-7.945			26.147								8.1618	135.154
-154.809	-7.9674			26.147								8.18	131.15
-152.752	-7.9839			26.147								8.1972	127.611
-151.695	-7.9968			26.147								8.2237	121.035
-150.492	-8.0183			26.147								8.4041	9.512
-148.59	-8.0358			26.147								8.2626	5.101
-146.709	-8.0504			26.147								8.2577	7.618
-145.595	-8.0657			26.147								8.285	7.437
-144.387	-8.0821			26.147								8.2948	10.295
-142.932	-8.0988			26.147								8.3146	10.279
-141.229	-8.115			26.147								8.325	13.047
-139.931	-8.1269			26.147								8.34	13.204
-138.1	-8.1434			26.147								8.3564	15.169
-135.154	-8.1618			26.147								8.37	15.823
-131.15	-8.18			26.147								8.3855	17.3
-127.611	-8.1972			26.147								8.4034	19.387
-121.035	-8.2237			26.147								8.4182	19.74
-9.512	-8.4041			26.147								8.43	21.138
-5.101	-8.2626			26.147								8.45	22.293
-7.618	-8.2577			26.147								8.4669	24.163
-7.437	-8.285			26.147								8.4812	24.221
-10.295	-8.2948			26.147								8.5004	25.199
-10.279	-8.3146			26.147								8.5186	24.234
-13.047	-8.325			26.147								8.535	23.649
-13.204	-8.34			26.147								8.5471	24.078
-15.169	-8.3564			26.147								8.565	23.393
-15.823	-8.37			26.147								8.5898	22.041
-17.3	-8.3855			26.147								8.6	21.825
-19.387	-8.4034			26.147								8.6195	21.765
-19.74	-8.4182			26.147								8.63	21.344
-21.138	-8.43			26.147								8.6473	21.127
-22.293	-8.45			26.147								8.6659	21.118
-24.163	-8.4669			26.147								8.6818	20.601
-24.221	-8.4812			26.147								8.6984	20.896
-25.199	-8.5004			26.147								8.7167	20.509
-24.234	-8.5186			26.147								8.7345	20.57
-23.649	-8.535			26.147								8.7495	20.424
-24.078	-8.5471			26.147								8.7658	19.969
-23.393	-8.565			26.147								8.7818	19.93
-22.041	-8.5898			26.147								8.7975	19.836
-21.825	-8.6			26.147								8.8136	20.034
-21.765	-8.6195			26.147								8.8325	19.941
-21.344	-8.63			26.147								8.8455	19.948
-21.127	-8.6473			26.147								8.865	19.868
-21.118	-8.6659			26.147								8.8784	19.652
-20.601	-8.6818			26.147								8.8933	19.387
-20.896	-8.6984			26.147								8.9107	18.659
-20.509	-8.7167			26.147								8.9334	16.994
-20.57	-8.7345			26.147								8.9456	16.715
-20.424	-8.7495			26.147								8.9627	16.459
-19.969	-8.7658			26.147								8.9815	16.354
-19.93	-8.7818			26.147								8.9976	16.374
-19.836	-8.7975			26.147								9.0136	16.355
-20.034	-8.8136			26.147								9.0298	16.388
-19.941	-8.8325			26.147								9.045	16.488
-19.948	-8.8455			26.147								9.057	16.561
-19.868	-8.865			26.147								9.0733	16.588
-19.652	-8.8784			26.147								9.0898	16.564
-19.387	-8.8933			26.147								9.1084	15.878
-18.659	-8.9107			26.147								9.1212	15.837
-16.994	-8.9334			26.147								9.1379	15.688
-16.715	-8.9456			26.147								9.1576	15.543
-16.459	-8.9627			26.147								9.17	15.509
-16.354	-8.9815			26.147								9.1807	15.512
-16.374	-8.9976			26.147								9.2009	15.535
-16.355	-9.0136			26.147								9.2174	15.563
-16.388	-9.0298			26.147								9.234	15.386
-16.488	-9.045			26.147								9.25	15.351
-16.561	-9.057			26.147								9.265	15.404
-16.588	-9.0733			26.147								9.2809	15.434
-16.564	-9.0898			26.147								9.2965	15.555
-15.878	-9.1084			26.147								9.3126	15.67
-15.837	-9.1212			26.147								9.3325	15.826
-15.688	-9.1379			26.147								9.3489	15.995
-15.543	-9.1576			26.147								9.365	16.057
-15.509	-9.17			26.147								9.365	13.526
-15.512	-9.1807			26.147								9.3886	11.382
-15.535	-9.2009			26.147								9.41	10.761
-15.563	-9.2174			26.147								9.4269	10.163
-15.386	-9.234			26.147								9.4445	9.828
-15.351	-9.25			26.147								9.4593	9.366
-15.404	-9.265			26.147								9.48	9.196
-15.434	-9.2809			26.147								9.495	8.778
-15.555	-9.2965			26.147								9.5119	8.617
-15.67	-9.3126			26.147								9.5287	8.528
-15.826	-9.3325			26.147								9.5437	8.359
-15.995	-9.3489			26.147								9.56	8.074
-16.057	-9.365			26.147								9.5764	7.944
-13.526	-9.365			26.147								9.5929	7.832
-11.382	-9.3886			26.147								9.6031	7.534
-10.761	-9.41			26.147								9.6201	7.227
-10.163	-9.4269			26.147								9.6363	7.118
-9.828	-9.4445			26.147								9.655	6.808
-9.366	-9.4593			26.147								9.6769	6.691
-9.196	-9.48			26.147								9.6924	6.613
-8.778	-9.495			26.147								9.7085	6.441
-8.617	-9.5119			26.147								9.7239	6.112
-8.528	-9.5287			26.147								9.7451	6.045
-8.359	-9.5437			26.147								9.7601	5.96
-8.074	-9.56			26.147								9.7757	5.767
-7.944	-9.5764			26.147								9.7924	5.656
-7.832	-9.5929			26.147								9.8092	5.58
-7.534	-9.6031			26.147								9.825	5.488
-7.227	-9.6201			26.147								9.84	5.346
-7.118	-9.6363			26.147								9.8567	5.245
-6.808	-9.655			26.147								9.8769	5.205
-6.691	-9.6769			26.147								9.8929	5.169
-6.613	-9.6924			26.147								9.9089	5.071
-6.441	-9.7085			26.147								9.92	4.878
-6.112	-9.7239			26.147								9.9367	4.758
-6.045	-9.7451			26.147								9.9532	4.764
-5.96	-9.7601			26.147								9.969	4.638
-5.767	-9.7757			26.147								9.9848	4.485
-5.656	-9.7924			26.147								10.0002	4.329
-5.58	-9.8092			26.147								10.025	4.343
-5.488	-9.825			26.147								10.0412	4.335
-5.346	-9.84			26.147								10.0576	4.331
-5.245	-9.8567			26.147								10.0727	4.269
-5.205	-9.8769			26.147								10.0887	4.086
-5.169	-9.8929			26.147								10.105	3.999
-5.071	-9.9089			26.147								10.121	4.006
-4.878	-9.92			26.147								10.1375	4.046
-4.758	-9.9367			26.147								10.1498	3.973
-4.764	-9.9532			26.147								10.1644	3.677
-4.638	-9.969			26.147								10.185	3.586
-4.485	-9.9848			26.147								10.2011	3.649
-4.329	-10.0002			26.147								10.2179	3.718
-4.343	-10.025			26.147								10.2329	3.707
-4.335	-10.0412			26.147								10.2499	3.714
-4.331	-10.0576			26.147								10.2652	3.807
-4.269	-10.0727			26.147								10.2817	3.949
-4.086	-10.0887			26.147								10.2977	4.015
-3.999	-10.105			26.147								10.31	4.091
-4.006	-10.121			26.147								10.325	4.006
-4.046	-10.1375			26.147								10.34	3.852
-3.973	-10.1498			26.147								10.3604	3.5
-3.677	-10.1644			26.147								10.3769	3.472
-3.586	-10.185			26.147								10.3915	3.176
-3.649	-10.2011			26.147								10.4091	3.112
-3.718	-10.2179			26.147								10.424	2.901
-3.707	-10.2329			26.147								10.441	2.92
-3.714	-10.2499			26.147								10.4502	2.66
-3.807	-10.2652			26.147								10.4695	2.679
-3.949	-10.2817			26.147								10.485	2.75
-4.015	-10.2977			26.147								10.5008	2.742
-4.091	-10.31			26.147								10.5174	2.796
-4.006	-10.325			26.147								10.5379	2.903
-3.852	-10.34			26.147								10.5537	3.023
-3.5	-10.3604			26.147								10.5652	3.078
-3.472	-10.3769			26.147								10.58	2.974
-3.176	-10.3915			26.147								10.5971	2.988
-3.112	-10.4091			26.147								10.6137	3.099
-2.901	-10.424			26.147								10.6299	3.219
-2.92	-10.441			26.147								10.6455	3.325
-2.66	-10.4502			26.147								10.6617	3.471
-2.679	-10.4695			26.147								10.6781	3.601
-2.75	-10.485			26.147								10.6939	3.696
-2.742	-10.5008			26.147								10.7122	3.642
-2.796	-10.5174			26.147								10.7296	3.659
-2.903	-10.5379			26.147								10.7454	3.776
-3.023	-10.5537			26.147								10.7616	3.914
-3.078	-10.5652			26.147								10.7777	4.003
-2.974	-10.58			26.147								10.7925	3.999
-2.988	-10.5971			26.147								10.8097	4.041
-3.099	-10.6137			26.147								10.8254	4.155
-3.219	-10.6299			26.147								10.838	4.265
-3.325	-10.6455			26.147								10.854	4.411
-3.471	-10.6617			26.147								10.8701	4.541
-3.601	-10.6781			26.147								10.8937	4.696
-3.696	-10.6939			26.147								10.905	4.73
-3.642	-10.7122			26.147								10.925	4.648
-3.659	-10.7296			26.147								10.94	4.463
-3.776	-10.7454			26.147								10.956	4.149
-3.914	-10.7616			26.147								10.9779	4.206
-4.003	-10.7777			26.147								10.9933	4.244
-3.999	-10.7925			26.147								11.009	4.125
-4.041	-10.8097			26.147								11.0232	3.804
-4.155	-10.8254			26.147								11.0409	3.844
-4.265	-10.838			26.147								11.0579	3.986
-4.411	-10.854			26.147								11.0741	4.134
-4.541	-10.8701			26.147								11.0857	4.254
-4.696	-10.8937			26.147								11.102	4.423
-4.73	-10.905			26.147								11.1183	4.569
-4.648	-10.925			26.147								11.1346	4.722
-4.463	-10.94			26.147								11.1549	4.869
-4.149	-10.956			26.147								11.17	4.944
-4.206	-10.9779			26.147								11.186	5.007
-4.244	-10.9933			26.147								11.2	4.613
-4.125	-11.009			26.147								11.2173	4.316
-3.804	-11.0232			26.147								11.2347	4.413
-3.844	-11.0409			26.147								11.25	4.549
-3.986	-11.0579			26.147								11.2667	4.65
-4.134	-11.0741			26.147								11.2831	4.092
-4.254	-11.0857			26.147								11.2981	4.153
-4.423	-11.102			26.147								11.31	4.163
-4.569	-11.1183			26.147								11.33	4.369
-4.722	-11.1346			26.147								11.3461	4.41
-4.869	-11.1549			26.147								11.3592	4.045
-4.944	-11.17			26.147								11.3772	3.957
-5.007	-11.186			26.147								11.3937	4.009
-4.613	-11.2			26.147								11.4056	4.109
-4.316	-11.2173			26.147								11.4216	4.183
-4.413	-11.2347			26.147								11.4361	4.17
-4.549	-11.25			26.147								11.4527	4.054
-4.65	-11.2667			26.147								11.4698	4.099
-4.092	-11.2831			26.147								11.4839	3.93
-4.153	-11.2981			26.147								11.5007	3.788
-4.163	-11.31			26.147								11.5135	3.861
-4.369	-11.33			26.147								11.53	3.99
-4.41	-11.3461			26.147								11.55	4.106
-4.045	-11.3592			26.147								11.563	3.676
-3.957	-11.3772			26.147								11.5808	3.724
-4.009	-11.3937			26.147								11.5978	3.832
-4.109	-11.4056			26.147								11.61	3.455
-4.183	-11.4216			26.147								11.6295	3.522
-4.17	-11.4361			26.147								11.6459	3.636
-4.054	-11.4527			26.147								11.67	3.838
-4.099	-11.4698			26.147								11.6778	3.137
-3.93	-11.4839			26.147								11.7016	3.215
-3.788	-11.5007			26.147								11.7187	3.413
-3.861	-11.5135			26.147								11.7347	3.562
-3.99	-11.53			26.147								11.75	3.758
-4.106	-11.55			26.147								11.7743	3.924
-3.676	-11.563			26.147								11.7773	2.684
-3.724	-11.5808			26.147								11.8059	2.961
-3.832	-11.5978			26.147								11.8228	3.116
-3.455	-11.61			26.147								11.8398	3.275
-3.522	-11.6295			26.147								11.8594	3.486
-3.636	-11.6459			26.147								11.8741	3.518
-3.838	-11.67			26.147								11.883	2.45
-3.137	-11.6778			26.147								11.905	2.66
-3.215	-11.7016			26.147								11.9188	2.834
-3.413	-11.7187			26.147								11.9346	2.986
-3.562	-11.7347			26.147								11.9501	3.23
-3.758	-11.75			26.147								11.9659	3.334
-3.924	-11.7743			26.147								11.9827	3.562
-2.684	-11.7773			26.147								11.9984	3.652
-2.961	-11.8059			26.147								12.0144	3.806
-3.116	-11.8228			26.147								12.0329	2.671
-3.275	-11.8398			26.147								12.049	2.718
-3.486	-11.8594			26.147								12.0622	3.03
-3.518	-11.8741			26.147								12.0775	3.1
-2.45	-11.883			26.147								12.0948	3.347
-2.66	-11.905			26.147								12.1101	3.417
-2.834	-11.9188			26.147								12.1226	3.633
-2.986	-11.9346			26.147								12.1384	3.689
-3.23	-11.9501			26.147								12.1545	3.848
-3.334	-11.9659			26.147								12.1585	2.186
-3.562	-11.9827			26.147								12.18	2.297
-3.652	-11.9984			26.147								12.1985	2.549
-3.806	-12.0144			26.147								12.2132	2.597
-2.671	-12.0329			26.147								12.2269	2.868
-2.718	-12.049			26.147								12.2415	2.938
-3.03	-12.0622			26.147								12.2594	3.179
-3.1	-12.0775			26.147								12.2737	3.23
-3.347	-12.0948			26.147								12.2904	3.502
-3.417	-12.1101			26.147								12.3066	3.562
-3.633	-12.1226			26.147								12.3267	3.267
-3.689	-12.1384			26.147								12.336	2.122
-3.848	-12.1545			26.147								12.3546	1.797
-2.186	-12.1585			26.147								12.3701	2.226
-2.297	-12.18			26.147								12.384	2.167
-2.549	-12.1985			26.147								12.4039	2.524
-2.597	-12.2132			26.147								12.4174	2.452
-2.868	-12.2269			26.147								12.4351	2.789
-2.938	-12.2415			26.147								12.4504	2.771
-3.179	-12.2594			26.147								12.4669	3.048
-3.23	-12.2737			26.147								12.4832	3.151
-3.502	-12.2904			26.147								12.4951	3.318
-3.562	-12.3066			26.147								12.5103	3.398
-3.267	-12.3267			26.147								12.5088	1.857
-2.122	-12.336			26.147								12.55	2.105
-1.797	-12.3546			26.147								12.5628	2.3
-2.226	-12.3701			26.147								12.58	2.456
-2.167	-12.384			26.147								12.5903	2.574
-2.524	-12.4039			26.147								12.604	2.717
-2.452	-12.4174			26.147								12.6196	2.841
-2.789	-12.4351			26.147								12.6311	3.002
-2.771	-12.4504			26.147								12.6471	3.103
-3.048	-12.4669			26.147								12.6595	3.261
-3.151	-12.4832			26.147								12.6749	3.36
-3.318	-12.4951			26.147								12.687	3.539
-3.398	-12.5103			26.147								12.6984	3.597
-1.857	-12.5088			26.147								12.715	3.769
-2.105	-12.55			26.147								12.709	1.466
-2.3	-12.5628			26.147								12.7426	1.892
-2.456	-12.58			26.147								12.7536	1.861
-2.574	-12.5903			26.147								12.7717	2.247
-2.717	-12.604			26.147								12.7827	2.204
-2.841	-12.6196			26.147								12.7997	2.56
-3.002	-12.6311			26.147								12.8103	2.562
-3.103	-12.6471			26.147								12.8235	2.872
-3.261	-12.6595			26.147								12.8381	2.899
-3.36	-12.6749			26.147								12.8508	3.169
-3.539	-12.687			26.147								12.8659	3.227
-3.597	-12.6984			26.147								12.8799	3.456
-3.769	-12.715			26.147								12.895	3.542
-1.466	-12.709			26.147								12.9075	3.714
-1.892	-12.7426			26.147								12.9195	3.777
-1.861	-12.7536			26.147								12.9351	3.949
-2.247	-12.7717			26.147								12.9468	4.031
-2.204	-12.7827			26.147								12.9634	4.152
-2.56	-12.7997			26.147								12.9751	4.233
-2.562	-12.8103			26.147								12.9904	4.328
-2.872	-12.8235			26.147								13.0027	4.407
-2.899	-12.8381			26.147								13.019	4.485
-3.169	-12.8508			26.147								13.03	4.556
-3.227	-12.8659			26.147								13.0423	4.628
-3.456	-12.8799			26.147								13.0591	4.724
-3.542	-12.895			26.147								13.07	4.788
-3.714	-12.9075			26.147								13.0864	4.882
-3.777	-12.9195			26.147								13.0986	4.928
-3.949	-12.9351			26.147								13.1082	3.99
-4.031	-12.9468			26.147								13.1143	0.748
-4.152	-12.9634			26.147								13.1368	0.437
-4.233	-12.9751			26.147								13.155	0.859
-4.328	-12.9904			26.147								13.17	0.718
-4.407	-13.0027			26.147								13.1843	1.143
-4.485	-13.019			26.147								13.1975	1.115
-4.556	-13.03			26.147								13.2126	1.373
-4.628	-13.0423			26.147								13.2244	1.448
-4.724	-13.0591			26.147								13.2412	1.593
-4.788	-13.07			26.147								13.2521	1.763
-4.882	-13.0864			26.147								13.2631	1.754
-4.928	-13.0986			26.147								13.28	2.06
-3.99	-13.1082			26.147								13.2908	2.069
-0.748	-13.1143			26.147								13.3088	2.349
-0.437	-13.1368			26.147								13.32	2.354
-0.859	-13.155			26.147								13.3362	2.629
-0.718	-13.17			26.147								13.3481	2.635
-1.143	-13.1843			26.147								13.3608	2.83
-1.115	-13.1975			26.147								13.3754	2.888
-1.373	-13.2126			26.147								13.3891	3.089
-1.448	-13.2244			26.147								13.4043	3.171
-1.593	-13.2412			26.147								13.4166	3.346
-1.763	-13.2521			26.147								13.4314	3.46
-1.754	-13.2631			26.147								13.4449	3.606
-2.06	-13.28			26.147								13.46	3.716
-2.069	-13.2908			26.147								13.4722	3.855
-2.349	-13.3088			26.147								13.4847	3.949
-2.354	-13.32			26.147								13.5	4.004
-2.629	-13.3362			26.147								13.5117	4.092
-2.635	-13.3481			26.147								13.5282	4.165
-2.83	-13.3608			26.147								13.54	4.245
-2.888	-13.3754											13.5557	4.333
-3.089	-13.3891											13.5682	4.414
-3.171	-13.4043											13.58	4.457
-3.346	-13.4166											13.5957	4.563
-3.46	-13.4314											13.6078	4.616
-3.606	-13.4449											13.6246	4.723
-3.716	-13.46											13.6353	4.784
-3.855	-13.4722											13.6516	4.888
-3.949	-13.4847											13.6641	4.945
-4.004	-13.5											13.68	5.032
-4.092	-13.5117											13.6912	5.103
-4.165	-13.5282											13.7045	5.178
-4.245	-13.54											13.72	5.243
-4.333	-13.5557											13.7316	5.316
-4.414	-13.5682											13.748	5.399
-4.457	-13.58											13.76	5.461
-4.563	-13.5957											13.7753	5.553
-4.616	-13.6078											13.7881	5.622
-4.723	-13.6246											13.8	5.688
-4.784	-13.6353											13.8155	5.768
-4.888	-13.6516											13.8282	5.835
-4.945	-13.6641											13.8442	5.913
-5.032	-13.68											13.8555	5.98
-5.103	-13.6912											13.8714	6.069
-5.178	-13.7045											13.8844	6.14
-5.243	-13.72											13.9	6.218
-5.316	-13.7316											13.9115	6.283
-5.399	-13.748											13.8392	-0.131
-5.461	-13.76											13.9357	-0.559
-5.553	-13.7753											13.9512	-0.659
-5.622	-13.7881											13.97	-0.02
-5.688	-13.8											13.98	-0.298
-5.768	-13.8155											13.9986	0.396
-5.835	-13.8282											14.0099	0.004
-5.913	-13.8442											14.023	0.506
-5.98	-13.8555											14.0396	0.325
-6.069	-13.8714											14.0501	0.61
-6.14	-13.8844											14.0669	0.626
-6.218	-13.9											14.078	0.763
-6.283	-13.9115											14.0934	0.921
0.131	-13.8392											14.1051	0.986
0.559	-13.9357											14.1213	1.228
0.659	-13.9512											14.1323	1.252
0.02	-13.97											14.1452	1.588
0.298	-13.98											14.161	1.531
-0.396	-13.9986											14.1747	1.848
-0.004	-14.0099											14.189	1.801
-0.506	-14.023											14.2021	2.088
-0.325	-14.0396											14.2169	2.067
-0.61	-14.0501											14.23	2.319
-0.626	-14.0669											14.2406	2.305
-0.763	-14.078											14.2582	2.563
-0.921	-14.0934											14.2696	2.58
-0.986	-14.1051											14.2859	2.798
-1.228	-14.1213											14.297	2.847
-1.252	-14.1323											14.3141	3.054
-1.588	-14.1452											14.325	3.125
-1.531	-14.161											14.3419	3.273
-1.848	-14.1747											14.3533	3.381
-1.801	-14.189											14.3653	3.457
-2.088	-14.2021											14.3809	3.641
-2.067	-14.2169											14.3933	3.693
-2.319	-14.23											14.41	3.87
-2.305	-14.2406											14.421	3.92
-2.563	-14.2582											14.4372	4.028
-2.58	-14.2696											14.4493	4.096
-2.798	-14.2859											14.461	4.185
-2.847	-14.297											14.4767	4.275
-3.054	-14.3141											14.4899	4.359
-3.125	-14.325											14.5049	4.444
-3.273	-14.3419											14.5175	4.497
-3.381	-14.3533											14.5327	4.578
-3.457	-14.3653											14.545	4.654
-3.641	-14.3809											14.5605	4.746
-3.693	-14.3933											14.5734	4.802
-3.87	-14.41											14.585	4.858
-3.92	-14.421											14.601	4.941
-4.028	-14.4372											14.613	5.016
-4.096	-14.4493											14.6296	5.098
-4.185	-14.461											14.6492	5.217
-4.275	-14.4767											14.665	5.308
-4.359	-14.4899											14.6807	5.398
-4.444	-14.5049											14.697	5.482
-4.497	-14.5175											14.7129	5.572
-4.578	-14.5327											14.7295	5.67
-4.654	-14.545											14.7451	5.762
-4.746	-14.5605											14.7568	5.833
-4.802	-14.5734											14.7729	5.909
-4.858	-14.585											14.7894	6.006
-4.941	-14.601											14.805	6.105
-5.016	-14.613											14.825	6.215
-5.098	-14.6296											14.8407	6.316
-5.217	-14.6492											14.8568	6.402
-5.308	-14.665											14.8729	6.499
-5.398	-14.6807											14.8896	6.592
-5.482	-14.697											14.905	6.668
-5.572	-14.7129											14.917	6.735
-5.67	-14.7295											14.9328	6.828
-5.762	-14.7451											14.9496	6.913
-5.833	-14.7568											14.965	6.997
-5.909	-14.7729											14.9807	7.075
-6.006	-14.7894											15.0006	7.158
-6.105	-14.805											15.0167	7.277
-6.215	-14.825											15.0293	7.357
-6.316	-14.8407											15.045	7.433
-6.402	-14.8568											15.0606	7.551
-6.499	-14.8729											15.077	7.598
-6.592	-14.8896											15.0929	7.682
-6.668	-14.905											15.1093	7.777
-6.735	-14.917											15.125	7.876
-6.828	-14.9328											15.1406	7.967
-6.913	-14.9496											15.155	8.005
-6.997	-14.965											15.16	7.926
-7.075	-14.9807											15.1578	7.762
-7.158	-15.0006											15.155	7.718
-7.277	-15.0167											15.16	7.692
-7.357	-15.0293											15.155	7.608
-7.433	-15.045
-7.551	-15.0606
-7.598	-15.077
-7.682	-15.0929
-7.777	-15.1093
-7.876	-15.125
-7.967	-15.1406
-8.005	-15.155
-7.926	-15.16
-7.762	-15.1578
-7.718	-15.155
-7.692	-15.16
-7.608	-15.155

## Sheet: MA135L60
WORKSHOP 3 EXPORTED DATA: [C:\Users\Maleki\2012-5-14\Ma135l60.w01 - 1]					LOAD(KN)	DISPLACEMENT(mm)								LOAD(KN)	DISPLACEMENT(mm)
*************************************************************************************************					0	0								0.007	-0.005
Source of data: ToolKit				25.525	0.698174	0.0156								0.006	-0.005
WS3 File Version: 1.04				25.525	1.33509	0.0308								0.012	-0.0094
Number of bytes in subfile: 4990				25.525	1.96443	0.0468								0.004	-0.005
Total number of data points: 584				25.525	2.40512	0.0634								0.012	-0.005
Test date: 14/05/2012				25.525	2.65881	0.0799								0.006	-0.005
Test time: 21:50:12				25.525	3.08487	0.0958								0.009	-0.0089
Player Step: 1				25.525	3.61392	0.1158								0.004	-0.005
Step Capture No: 1				25.525	4.10286	0.1308								0.002	-0.005
Actuator: 1				25.525	4.50723	0.1469								0.009	-0.005
*************************************************************************************************				25.525	4.87312	0.1634								0.012	-0.006
Actuator: 1 Channel:0	Actuator: 1 Channel:1			25.525	4.87583	0.1798								0.011	-0.01
Load Current (kN)	Stroke Current (mm)			25.525	5.28943	0.1909								0.007	-0.0086
-0.007	0.005			25.525	5.78162	0.2067								0.008	-0.01
-0.006	0.005	fc	25.525	25.525	6.25809	0.2225								0.011	-0.01
-0.012	0.0094			25.525	6.81045	0.2389								0.008	-0.0095
-0.004	0.005			25.525	7.26903	0.2556								0.019	-0.01
-0.012	0.005			25.525	7.68262	0.271								0.011	-0.0099
-0.006	0.005			25.525	8.05448	0.2929								0.007	-0.01
-0.009	0.0089			25.525	8.62798	0.3062								0.011	-0.0087
-0.004	0.005			25.525	9.21774	0.3221								0.009	-0.0064
-0.002	0.005			25.525	9.79449	0.3381								0	-0.007
-0.009	0.005			25.525	9.91916	0.359								0.006	-0.01
-0.012	0.006			25.525	10.3306	0.3708								0.018	-0.0038
-0.011	0.01			25.525	11.0754	0.3858								0.03	0.0127
-0.007	0.0086			25.525	11.6901	0.3971								0.051	0.0288
-0.008	0.01			25.525	12.4961	0.4137								0.133	0.0486
-0.011	0.01			25.525	13.371	0.4296		MAX LOAD(KN)	@ DISPLACEMENT(mm)					0.455	0.0642
-0.008	0.0095			25.525	14.1792	0.4458		82.784	1.3064					1.288	0.0798
-0.019	0.01			25.525	14.9945	0.4658		delta ultimate	8.5755					2.463	0.095
-0.011	0.0099			25.525	15.7799	0.4808								3.624	0.111
-0.007	0.01			25.525	16.6917	0.4964								4.437	0.1276
-0.011	0.0087			25.525	17.5991	0.5128								4.905	0.1441
-0.009	0.0064			25.525	18.4593	0.5294								5.691	0.16
0	0.007			25.525	19.3955	0.5451								6.667	0.18
-0.006	0.01			25.525	20.3972	0.5608								7.569	0.195
-0.018	0.0038			25.525	21.2536	0.5763								8.315	0.2111
-0.03	-0.0127			25.525	22.2012	0.5925								8.99	0.2276
-0.051	-0.0288			25.525	22.94	0.6049								8.995	0.244
-0.133	-0.0486			25.525	23.9612	0.6206								9.758	0.2551
-0.455	-0.0642			25.525	25.2541	0.6404								10.666	0.2709
-1.288	-0.0798			25.525	26.4298	0.6558								11.545	0.2867
-2.463	-0.095			25.525	27.6185	0.6711								12.564	0.3031
-3.624	-0.111			25.525	28.8219	0.6872								13.41	0.3198
-4.437	-0.1276			25.525	30.1386	0.7027								14.173	0.3352
-4.905	-0.1441			25.525	31.5176	0.7184								14.859	0.3571
-5.691	-0.16			25.525	32.915	0.7348								15.917	0.3704
-6.667	-0.18			25.525	34.4273	0.7507								17.005	0.3863
-7.569	-0.195			25.525	36.3376	0.7706								18.069	0.4023
-8.315	-0.2111			25.525	38.2402	0.7908								18.299	0.4232
-8.99	-0.2276			25.525	39.7927	0.8061								19.058	0.435
-8.995	-0.244			25.525	41.3679	0.8221								20.432	0.45
-9.758	-0.2551			25.525	42.955	0.8379								21.566	0.4613
-10.666	-0.2709			25.525	44.9623	0.8576								23.053	0.4779
-11.545	-0.2867			25.525	46.6335	0.8739								24.667	0.4938
-12.564	-0.3031			25.525	48.341	0.8899								26.158	0.51
-13.41	-0.3198			25.525	49.6592	0.9009								27.662	0.53
-14.173	-0.3352			25.525	51.4096	0.9168								29.111	0.545
-14.859	-0.3571			25.525	53.1404	0.9335								30.793	0.5606
-15.917	-0.3704			25.525	54.7552	0.9503								32.467	0.577
-17.005	-0.3863			25.525	56.3195	0.9658								34.054	0.5936
-18.069	-0.4023			25.525	57.8807	0.9817								35.781	0.6093
-18.299	-0.4232			25.525	59.4006	0.9978								37.629	0.625
-19.058	-0.435			25.525	60.9547	1.0144								39.209	0.6405
-20.432	-0.45			25.525	62.1304	1.0258								40.957	0.6567
-21.566	-0.4613			25.525	63.7507	1.0414								42.32	0.6691
-23.053	-0.4779			25.525	65.3833	1.0573								44.204	0.6848
-24.667	-0.4938			25.525	67.4388	1.0771								46.589	0.7046
-26.158	-0.51			25.525	69.0845	1.0936								48.758	0.72
-27.662	-0.53			25.525	70.7362	1.1098								50.951	0.7353
-29.111	-0.545			25.525	72.3591	1.1258								53.171	0.7514
-30.793	-0.5606			25.525	73.8769	1.1417								55.6	0.7669
-32.467	-0.577			25.525	75.3264	1.1579								58.144	0.7826
-34.054	-0.5936			25.525	76.7606	1.1748								60.722	0.799
-35.781	-0.6093			25.525	78.0757	1.1908								63.512	0.8149
-37.629	-0.625			25.525	79.601	1.2108								67.036	0.8348
-39.209	-0.6405			25.525	80.4515	1.2234								70.546	0.855
-40.957	-0.6567			25.525	81.2413	1.2358								73.41	0.8703
-42.32	-0.6691			25.525	82.3233	1.2563								76.316	0.8863
-44.204	-0.6848			25.525	82.6556	1.2742								79.244	0.9021
-46.589	-0.7046			25.525	82.7239	1.2908								82.947	0.9218
-48.758	-0.72			25.525	82.784	1.3064								86.03	0.9381
-50.951	-0.7353			25.525	82.7152	1.3234								89.18	0.9541
-53.171	-0.7514			25.525	82.2501	1.3406								91.612	0.9651
-55.6	-0.7669			25.525	80.9681	1.3585								94.841	0.981
-58.144	-0.7826			25.525	79.2926	1.3758								98.034	0.9977
-60.722	-0.799			25.525	77.803	1.3947								101.013	1.0145
-63.512	-0.8149			25.525	77.0859	1.4096								103.899	1.03
-67.036	-0.8348			25.525	76.63	1.425								106.779	1.0459
-70.546	-0.855			25.525	76.4354	1.4358								109.583	1.062
-73.41	-0.8703			25.525	76.0771	1.4527								112.45	1.0786
-76.316	-0.8863			25.525	74.0124	1.4732								114.619	1.09
-79.244	-0.9021			25.525	71.9141	1.4872								117.608	1.1056
-82.947	-0.9218			25.525	71.752	1.5003								120.62	1.1215
-86.03	-0.9381			25.525	72.1987	1.5154								124.412	1.1413
-89.18	-0.9541			25.525	71.2099	1.5344								127.448	1.1578
-91.612	-0.9651			25.525	70.2706	1.55								130.495	1.174
-94.841	-0.981			25.525	70.3562	1.5669								133.489	1.19
-98.034	-0.9977			25.525	71.0359	1.5814								136.289	1.2059
-101.013	-1.0145			25.525	71.9352	1.5969								138.963	1.2221
-103.899	-1.03			25.525	72.9342	1.613								141.609	1.239
-106.779	-1.0459			25.525	73.7874	1.6295								144.035	1.255
-109.583	-1.062			25.525	74.0362	1.6421								146.849	1.275
-112.45	-1.0786			25.525	74.143	1.6586								148.418	1.2876
-114.619	-1.09			25.525	74.452	1.6749								149.875	1.3
-117.608	-1.1056			25.525	74.8586	1.6908								151.871	1.3205
-120.62	-1.1215			25.525	75.2532	1.706								152.484	1.3384
-124.412	-1.1413			25.525	75.4586	1.7229								152.61	1.355
-127.448	-1.1578			25.525	75.1383	1.744								152.721	1.3706
-130.495	-1.174			25.525	74.9989	1.7596								152.594	1.3876
-133.489	-1.19			25.525	75.0824	1.7708								151.736	1.4048
-136.289	-1.2059			25.525	75.476	1.7908								149.371	1.4227
-138.963	-1.2221			25.525	75.7963	1.8021								146.28	1.44
-141.609	-1.239			25.525	76.2479	1.8178								143.532	1.4589
-144.035	-1.255			25.525	76.6083	1.8348								142.209	1.4738
-146.849	-1.275			25.525	76.9417	1.8508								141.368	1.4892
-148.418	-1.2876			25.525	77.287	1.8662								141.009	1.5
-149.875	-1.3			25.525	77.4962	1.8826								140.348	1.5169
-151.871	-1.3205			25.525	77.8589	1.9063								136.539	1.5374
-152.484	-1.3384			25.525	78.0594	1.9183								132.668	1.5514
-152.61	-1.355			25.525	78.3104	1.9351								132.369	1.5645
-152.721	-1.3706			25.525	78.4118	1.9468								133.193	1.5796
-152.594	-1.3876			25.525	78.4378	1.9632								131.369	1.5986
-151.736	-1.4048			25.525	78.4031	1.9793								129.636	1.6142
-149.371	-1.4227			25.525	78.434	1.9958								129.794	1.6311
-146.28	-1.44			25.525	78.4855	2.0108								131.048	1.6456
-143.532	-1.4589			25.525	78.3977	2.0276								132.707	1.6611
-142.209	-1.4738			25.525	78.1445	2.0441								134.55	1.6772
-141.368	-1.4892			25.525	77.8225	2.0605								136.124	1.6937
-141.009	-1.5			25.525	77.5184	2.0758								136.583	1.7063
-140.348	-1.5169			25.525	77.3488	2.0958								136.78	1.7228
-136.539	-1.5374			25.525	76.9699	2.112								137.35	1.7391
-132.668	-1.5514			25.525	76.1861	2.1298								138.1	1.755
-132.369	-1.5645			25.525	75.6646	2.1446								138.828	1.7702
-133.193	-1.5796			25.525	75.6478	2.1593								139.207	1.7871
-131.369	-1.5986			25.525	75.7757	2.1758								138.616	1.8082
-129.636	-1.6142			25.525	75.8223	2.1908								138.359	1.8238
-129.794	-1.6311			25.525	74.4455	2.1862								138.513	1.835
-131.048	-1.6456			25.525	66.9363	2.2258								139.239	1.855
-132.707	-1.6611			25.525	66.3818	2.2352								139.83	1.8663
-134.55	-1.6772			25.525	64.5312	2.2602								140.663	1.882
-136.124	-1.6937			25.525	63.3089	2.262								141.328	1.899
-136.583	-1.7063			25.525	59.6288	2.2808								141.943	1.915
-136.78	-1.7228			25.525	57.5641	2.2938								142.58	1.9304
-137.35	-1.7391			25.525	55.5899	2.3158								142.966	1.9468
-138.1	-1.755			25.525	55.0468	2.3289								143.635	1.9705
-138.828	-1.7702			25.525	53.49	2.3458								144.005	1.9825
-139.207	-1.7871			25.525	52.3576	2.3622								144.468	1.9993
-138.616	-1.8082			25.525	50.011	2.3756								144.655	2.011
-138.359	-1.8238			25.525	48.4223	2.3947								144.703	2.0274
-138.513	-1.835			25.525	47.0389	2.412								144.639	2.0435
-139.239	-1.855			25.525	46.2069	2.4308								144.696	2.06
-139.83	-1.8663			25.525	46.1342	2.4464								144.791	2.075
-140.663	-1.882			25.525	45.7673	2.4658								144.629	2.0918
-141.328	-1.899			25.525	45.7765	2.4794								144.162	2.1083
-141.943	-1.915			25.525	45.1032	2.4958								143.568	2.1247
-142.58	-1.9304			25.525	44.6609	2.5131								143.007	2.14
-142.966	-1.9468			25.525	43.973	2.5262								142.694	2.16
-143.635	-1.9705			25.525	43.6581	2.5508								141.995	2.1762
-144.005	-1.9825			25.525	43.4944	2.5638								140.549	2.194
-144.468	-1.9993			25.525	43.245	2.5781								139.587	2.2088
-144.655	-2.011			25.525	42.9193	2.5917								139.556	2.2235
-144.703	-2.0274			25.525	42.3165	2.6106								139.792	2.24
-144.639	-2.0435			25.525	41.8026	2.6242								139.878	2.255
-144.696	-2.06			25.525	41.2801	2.6408								137.338	2.2504
-144.791	-2.075			25.525	40.9944	2.6568								123.485	2.29
-144.629	-2.0918			25.525	40.5526	2.6725								122.462	2.2994
-144.162	-2.1083			25.525	40.4198	2.6899								119.048	2.3244
-143.568	-2.1247			25.525	40.2659	2.7055								116.793	2.3262
-143.007	-2.14			25.525	40.0892	2.7258								110.004	2.345
-142.694	-2.16			25.525	39.8691	2.7408								106.195	2.358
-141.995	-2.1762			25.525	39.6154	2.7571								102.553	2.38
-140.549	-2.194			25.525	39.1395	2.7733								101.551	2.3931
-139.587	-2.2088			25.525	38.7953	2.7858								98.679	2.41
-139.556	-2.2235			25.525	38.4039	2.8009								96.59	2.4264
-139.792	-2.24			25.525	37.9562	2.8165								92.261	2.4398
-139.878	-2.255			25.525	37.7252	2.8337								89.33	2.4589
-137.338	-2.2504			25.525	37.4916	2.8497								86.778	2.4762
-123.485	-2.29			25.525	37.2894	2.8658								85.243	2.495
-122.462	-2.2994			25.525	36.9756	2.89								85.109	2.5106
-119.048	-2.3244			25.525	36.8899	2.9058								84.432	2.53
-116.793	-2.3262			25.525	36.9327	2.9218								84.449	2.5436
-110.004	-2.345			25.525	36.8585	2.9373								83.207	2.56
-106.195	-2.358			25.525	36.6379	2.954								82.391	2.5773
-102.553	-2.38			25.525	36.2178	2.9703								81.122	2.5904
-101.551	-2.3931			25.525	35.564	2.99								80.541	2.615
-98.679	-2.41			25.525	35.183	3.0009								80.239	2.628
-96.59	-2.4264			25.525	34.9038	3.0138								79.779	2.6423
-92.261	-2.4398			25.525	34.7217	3.0342								79.178	2.6559
-89.33	-2.4589			25.525	34.6425	3.0506								78.066	2.6748
-86.778	-2.4762			25.525	34.5341	3.0658								77.118	2.6884
-85.243	-2.495			25.525	34.3921	3.0817								76.154	2.705
-85.109	-2.5106			25.525	34.0734	3.0975								75.627	2.721
-84.432	-2.53			25.525	33.7205	3.1141								74.812	2.7367
-84.449	-2.5436			25.525	33.3329	3.1305								74.567	2.7541
-83.207	-2.56			25.525	32.9047	3.1458								74.283	2.7697
-82.391	-2.5773			25.525	32.5036	3.1619								73.957	2.79
-81.122	-2.5904			25.525	32.2147	3.1745								73.551	2.805
-80.541	-2.615			25.525	31.8677	3.1908								73.083	2.8213
-80.239	-2.628			25.525	31.3615	3.2108								72.205	2.8375
-79.779	-2.6423			25.525	30.8058	3.2263								71.57	2.85
-79.178	-2.6559			25.525	30.2128	3.2427								70.848	2.8651
-78.066	-2.6748			25.525	29.7521	3.2588								70.022	2.8807
-77.118	-2.6884			25.525	29.3282	3.2758								69.596	2.8979
-76.154	-2.705			25.525	29.0647	3.2916								69.165	2.9139
-75.627	-2.721			25.525	28.8588	3.3081								68.792	2.93
-74.812	-2.7367			25.525	28.7194	3.3238								68.213	2.9542
-74.567	-2.7541			25.525	28.4452	3.3358								68.055	2.97
-74.283	-2.7697			25.525	28.2386	3.3508								68.134	2.986
-73.957	-2.79			25.525	28.153	3.367								67.997	3.0015
-73.551	-2.805			25.525	28.1373	3.3868								67.59	3.0182
-73.083	-2.8213			25.525	28.1476	3.4025								66.815	3.0345
-72.205	-2.8375			25.525	28.2045	3.4182								65.609	3.0542
-71.57	-2.85			25.525	28.3471	3.4349								64.906	3.0651
-70.848	-2.8651			25.525	28.6056	3.4508								64.391	3.078
-70.022	-2.8807			25.525	28.8105	3.4661								64.055	3.0984
-69.596	-2.8979			25.525	28.9851	3.4781								63.909	3.1148
-69.165	-2.9139			25.525	29.171	3.4948								63.709	3.13
-68.792	-2.93			25.525	29.3737	3.5108								63.447	3.1459
-68.213	-2.9542			25.525	29.5943	3.5262								62.859	3.1617
-68.055	-2.97			25.525	29.7927	3.5422								62.208	3.1783
-68.134	-2.986			25.525	29.9749	3.5622								61.493	3.1947
-67.997	-3.0015			25.525	30.0974	3.5781								60.703	3.21
-67.59	-3.0182			25.525	30.234	3.5949								59.963	3.2261
-66.815	-3.0345			25.525	30.4405	3.6108								59.43	3.2387
-65.609	-3.0542			25.525	30.4985	3.626								58.79	3.255
-64.906	-3.0651			25.525	30.5343	3.6381								57.856	3.275
-64.391	-3.078			25.525	30.6096	3.655								56.831	3.2905
-64.055	-3.0984			25.525	30.6313	3.6708								55.737	3.3069
-63.909	-3.1148			25.525	30.6454	3.6862								54.887	3.323
-63.709	-3.13			25.525	30.6064	3.7024								54.105	3.34
-63.447	-3.1459			25.525	30.4605	3.7184								53.619	3.3558
-62.859	-3.1617			25.525	30.0616	3.7384								53.239	3.3723
-62.208	-3.1783			25.525	29.6236	3.7548								52.982	3.388
-61.493	-3.1947			25.525	29.319	3.7708								52.476	3.4
-60.703	-3.21			25.525	29.1189	3.7869								52.095	3.415
-59.963	-3.2261			25.525	28.9981	3.7991								51.937	3.4312
-59.43	-3.2387			25.525	28.7758	3.8158								51.908	3.451
-58.79	-3.255			25.525	28.5823	3.8311								51.927	3.4667
-57.856	-3.275			25.525	28.424	3.8476								52.032	3.4824
-56.831	-3.2905			25.525	28.3172	3.8641								52.295	3.4991
-55.737	-3.3069			25.525	24.7705	3.9411								52.772	3.515
-54.887	-3.323			25.525	18.7477	3.9526								53.15	3.5303
-54.105	-3.34			25.525	13.4155	3.9558								53.472	3.5423
-53.619	-3.3558			25.525	10.9849	3.9558								53.815	3.559
-53.239	-3.3723			25.525	9.94844	3.9608								54.189	3.575
-52.982	-3.388			25.525	9.83786	3.9657								54.596	3.5904
-52.476	-3.4			25.525	10.6797	3.9717								54.962	3.6064
-52.095	-3.415			25.525	12.0023	3.9889								55.298	3.6264
-51.937	-3.4312			25.525	13.3276	4.0046								55.524	3.6423
-51.908	-3.451			25.525	14.537	4.0204								55.776	3.6591
-51.927	-3.4667			25.525	15.5094	4.0368								56.157	3.675
-52.032	-3.4824			25.525	16.4011	4.0534								56.264	3.6902
-52.295	-3.4991			25.525	17.0245	4.0703								56.33	3.7023
-52.772	-3.515			25.525	17.5899	4.0878								56.469	3.7192
-53.15	-3.5303			25.525	17.8663	4.1029								56.509	3.735
-53.472	-3.5423			25.525	18.0186	4.1156								56.535	3.7504
-53.815	-3.559			25.525	18.229	4.1308								56.463	3.7666
-54.189	-3.575			25.525	18.5878	4.1478								56.194	3.7826
-54.596	-3.5904			25.525	18.8968	4.1626								55.458	3.8026
-54.962	-3.6064			25.525	19.2128	4.1797								54.65	3.819
-55.298	-3.6264			25.525	19.3537	4.1952								54.088	3.835
-55.524	-3.6423			25.525	19.2502	4.2108								53.719	3.8511
-55.776	-3.6591			25.525	19.3982	4.2271								53.496	3.8633
-56.157	-3.675			25.525	19.589	4.2433								53.086	3.88
-56.264	-3.6902			25.525	19.7305	4.2635								52.729	3.8953
-56.33	-3.7023			25.525	19.7652	4.2756								52.437	3.9118
-56.469	-3.7192			25.525	19.7478	4.2872								52.24	3.9283
-56.509	-3.735			25.525	19.4361	4.3065								45.697	4.0053
-56.535	-3.7504			25.525	19.1293	4.323								34.586	4.0168
-56.463	-3.7666			25.525	18.842	4.3388								24.749	4.02
-56.194	-3.7826			25.525	18.5764	4.3557								20.265	4.02
-55.458	-3.8026			25.525	18.4631	4.371								18.353	4.025
-54.65	-3.819			25.525	18.3731	4.3869								18.149	4.0299
-54.088	-3.835			25.525	18.2967	4.4034								19.702	4.0359
-53.719	-3.8511			25.525	18.3406	4.4191								22.142	4.0531
-53.496	-3.8633			25.525	18.7629	4.4397								24.587	4.0688
-53.086	-3.88			25.525	18.9954	4.4558								26.818	4.0846
-52.729	-3.8953			25.525	19.1505	4.4709								28.612	4.101
-52.437	-3.9118			25.525	19.1748	4.4835								30.257	4.1176
-52.24	-3.9283			25.525	19.1125	4.4991								31.407	4.1345
-45.697	-4.0053			25.525	19.1223	4.5158								32.45	4.152
-34.586	-4.0168			25.525	19.2041	4.5309								32.96	4.1671
-24.749	-4.02			25.525	19.3234	4.5475								33.241	4.1798
-20.265	-4.02			25.525	19.5348	4.5637								33.629	4.195
-18.353	-4.025			25.525	19.7467	4.5796								34.291	4.212
-18.149	-4.0299			25.525	20.0405	4.5958								34.861	4.2268
-19.702	-4.0359			25.525	20.3853	4.6158								35.444	4.2439
-22.142	-4.0531			25.525	20.5007	4.6312								35.704	4.2594
-24.587	-4.0688			25.525	20.4904	4.6473								35.513	4.275
-26.818	-4.0846			25.525	20.4449	4.6594								35.786	4.2913
-28.612	-4.101			25.525	20.3479	4.6758								36.138	4.3075
-30.257	-4.1176			25.525	20.2346	4.688								36.399	4.3277
-31.407	-4.1345			25.525	20.0741	4.707								36.463	4.3398
-32.45	-4.152			25.525	19.6546	4.7208								36.431	4.3514
-32.96	-4.1671			25.525	19.4182	4.7331								35.856	4.3707
-33.241	-4.1798			25.525	19.3505	4.7508								35.29	4.3872
-33.629	-4.195			25.525	19.3499	4.7658								34.76	4.403
-34.291	-4.212			25.525	19.2876	4.7814								34.27	4.4199
-34.861	-4.2268			25.525	19.1949	4.7942								34.061	4.4352
-35.444	-4.2439			25.525	18.9564	4.8108								33.895	4.4511
-35.704	-4.2594			25.525	18.7206	4.8244								33.754	4.4676
-35.513	-4.275			25.525	18.4452	4.8408								33.835	4.4833
-35.786	-4.2913			25.525	18.1623	4.853								34.614	4.5039
-36.138	-4.3075			25.525	18.0121	4.8647								35.043	4.52
-36.399	-4.3277			25.525	17.9015	4.8832								35.329	4.5351
-36.463	-4.3398			25.525	17.8663	4.8983								35.374	4.5477
-36.431	-4.3514			25.525	17.8457	4.9145								35.259	4.5633
-35.856	-4.3707			25.525	17.856	4.9306								35.277	4.58
-35.29	-4.3872			25.525	17.8961	4.9458								35.428	4.5951
-34.76	-4.403			25.525	17.9146	4.9614								35.648	4.6117
-34.27	-4.4199			25.525	17.8604	4.9776								36.038	4.6279
-34.061	-4.4352			25.525	17.6907	4.9908								36.429	4.6438
-33.895	-4.4511			25.525	17.2912	5.0088								36.971	4.66
-33.754	-4.4676			25.525	16.8602	5.0263								37.607	4.68
-33.835	-4.4833			25.525	16.5984	5.041								37.82	4.6954
-34.614	-4.5039			25.525	16.6163	5.0558								37.801	4.7115
-35.043	-4.52			25.525	16.7903	5.0733								37.717	4.7236
-35.329	-4.5351			25.525	16.8852	5.089								37.538	4.74
-35.374	-4.5477			25.525	16.928	5.1008								37.329	4.7522
-35.259	-4.5633			25.525	17.0088	5.1163								37.033	4.7712
-35.277	-4.58			25.525	17.1459	5.1328								36.259	4.785
-35.428	-4.5951			25.525	17.2879	5.1489								35.823	4.7973
-35.648	-4.6117			25.525	17.4224	5.1649								35.698	4.815
-36.038	-4.6279			25.525	17.546	5.1807								35.697	4.83
-36.429	-4.6438			25.525	17.6598	5.1958								35.582	4.8456
-36.971	-4.66			25.525	17.7834	5.2124								35.411	4.8584
-37.607	-4.68			25.525	17.9043	5.2287								34.971	4.875
-37.82	-4.6954			25.525	18.0316	5.2487								34.536	4.8886
-37.801	-4.7115			25.525	18.0772	5.2608								34.028	4.905
-37.717	-4.7236			25.525	18.1178	5.2727								33.506	4.9172
-37.538	-4.74			25.525	18.1823	5.2931								33.229	4.9289
-37.329	-4.7522			25.525	18.1899	5.3096								33.025	4.9474
-37.033	-4.7712			25.525	18.1775	5.3258								32.96	4.9625
-36.259	-4.785			25.525	18.1308	5.3419								32.922	4.9787
-35.823	-4.7973			25.525	17.9677	5.3586								32.941	4.9948
-35.698	-4.815			25.525	17.695	5.3758								33.015	5.01
-35.697	-4.83			25.525	17.321	5.3935								33.049	5.0256
-35.582	-4.8456			25.525	17.0554	5.4092								32.949	5.0418
-35.411	-4.8584			25.525	16.9475	5.4238								32.636	5.055
-34.971	-4.875			25.525	16.9052	5.4355								31.899	5.073
-34.536	-4.8886			25.525	16.8191	5.4508								31.104	5.0905
-34.028	-4.905			25.525	16.5209	5.4719								30.621	5.1052
-33.506	-4.9172			25.525	16.1919	5.4897								30.654	5.12
-33.229	-4.9289			25.525	15.9225	5.5055								30.975	5.1375
-33.025	-4.9474			25.525	15.7718	5.5203								31.15	5.1532
-32.96	-4.9625			25.525	15.6813	5.5311								31.229	5.165
-32.922	-4.9787			25.525	15.5306	5.547								31.378	5.1805
-32.941	-4.9948			25.525	15.3343	5.5636								31.631	5.197
-33.015	-5.01			25.525	15.1305	5.5758								31.893	5.2131
-33.049	-5.0256			25.525	14.7977	5.5936								32.141	5.2291
-32.949	-5.0418			25.525	14.5185	5.6095								32.369	5.2449
-32.636	-5.055			25.525	14.3359	5.6244								32.579	5.26
-31.899	-5.073			25.525	14.2231	5.6358								32.807	5.2766
-31.104	-5.0905			25.525	14.112	5.6508								33.03	5.2929
-30.621	-5.1052			25.525	14.0285	5.6669								33.265	5.3129
-30.654	-5.12			25.525	13.8795	5.6835								33.349	5.325
-30.975	-5.1375			25.525	13.6664	5.7004								33.424	5.3369
-31.15	-5.1532			25.525	13.5488	5.7158								33.543	5.3573
-31.229	-5.165			25.525	13.6507	5.7345								33.557	5.3738
-31.378	-5.1805			25.525	13.8838	5.7492								33.534	5.39
-31.631	-5.197			25.525	14.1277	5.7645								33.448	5.4061
-31.893	-5.2131			25.525	14.3299	5.78								33.147	5.4228
-32.141	-5.2291			25.525	14.4974	5.7958								32.644	5.44
-32.369	-5.2449			25.525	14.7045	5.8115								31.954	5.4577
-32.579	-5.26			25.525	14.9462	5.8279								31.464	5.4734
-32.807	-5.2766			25.525	15.1045	5.844								31.265	5.488
-33.03	-5.2929			25.525	15.3007	5.8558								31.187	5.4997
-33.265	-5.3129			25.525	15.5192	5.8715								31.028	5.515
-33.349	-5.325			25.525	15.768	5.8877								30.478	5.5361
-33.424	-5.3369			25.525	16.1176	5.9078								29.871	5.5539
-33.543	-5.3573			25.525	16.3903	5.9239								29.374	5.5697
-33.557	-5.3738			25.525	16.6722	5.9399								29.096	5.5845
-33.534	-5.39			25.525	16.9632	5.9558								28.929	5.5953
-33.448	-5.4061			25.525	17.2543	5.9716								28.651	5.6112
-33.147	-5.4228			25.525	17.5346	5.9878								28.289	5.6278
-32.644	-5.44			25.525	17.7319	5.9999								27.913	5.64
-31.954	-5.4577			25.525	17.9287	6.0158								27.299	5.6578
-31.464	-5.4734			25.525	18.0837	6.0314								26.784	5.6737
-31.265	-5.488			25.525	18.1504	6.0477								26.447	5.6886
-31.187	-5.4997			25.525	18.1715	6.0638								26.239	5.7
-31.028	-5.515			25.525	18.223	6.0839								26.034	5.715
-30.478	-5.5361			25.525	18.2788	6.1								25.88	5.7311
-29.871	-5.5539			25.525	18.3135	6.1158								25.605	5.7477
-29.374	-5.5697			25.525	18.3357	6.1318								25.212	5.7646
-29.096	-5.5845			25.525	18.3596	6.148								24.995	5.78
-28.929	-5.5953			25.525	18.3997	6.1603								25.183	5.7987
-28.651	-5.6112			25.525	18.4577	6.1758								25.613	5.8134
-28.289	-5.6278			25.525	18.4582	6.1958								26.063	5.8287
-27.913	-5.64			25.525	18.3433	6.2177								26.436	5.8442
-27.299	-5.6578			25.525	17.9753	6.2395								26.745	5.86
-26.784	-5.6737			25.525	17.5151	6.2552								27.127	5.8757
-26.447	-5.6886			25.525	17.4218	6.2674								27.573	5.8921
-26.239	-5.7			25.525	17.4533	6.2816								27.865	5.9082
-26.034	-5.715			25.525	17.4094	6.297								28.227	5.92
-25.88	-5.7311			25.525	17.2489	6.3147								28.63	5.9357
-25.605	-5.7477			25.525	16.8386	6.3335								29.089	5.9519
-25.212	-5.7646			25.525	16.1865	6.3553								29.734	5.972
-24.995	-5.78			25.525	15.8336	6.3703								30.237	5.9881
-25.183	-5.7987			25.525	15.5615	6.3853								30.757	6.0041
-25.613	-5.8134			25.525	15.2552	6.4008								31.294	6.02
-26.063	-5.8287			25.525	14.9576	6.4164								31.831	6.0358
-26.436	-5.8442			25.525	14.7386	6.4291								32.348	6.052
-26.745	-5.86			25.525	14.4535	6.4453								32.712	6.0641
-27.127	-5.8757			25.525	14.1673	6.4608								33.075	6.08
-27.573	-5.8921			25.525	13.8648	6.4764								33.361	6.0956
-27.865	-5.9082			25.525	13.5081	6.4937								33.484	6.1119
-28.227	-5.92			25.525	13.0512	6.5107								33.523	6.128
-28.63	-5.9357			25.525	12.3129	6.5322								33.618	6.1481
-29.089	-5.9519			25.525	11.7638	6.5475								33.721	6.1642
-29.734	-5.972			25.525	11.4033	6.5611								33.785	6.18
-30.237	-5.9881			25.525	11.2228	6.5758								33.826	6.196
-30.757	-6.0041			25.525	11.1312	6.587								33.87	6.2122
-31.294	-6.02			25.525	10.987	6.6032								33.944	6.2245
-31.831	-6.0358			25.525	10.8157	6.6197								34.051	6.24
-32.348	-6.052			25.525	10.6022	6.6358								34.052	6.26
-32.712	-6.0641			25.525	10.3268	6.6527								33.84	6.2819
-33.075	-6.08			25.525	10.0314	6.6696								33.161	6.3037
-33.361	-6.0956			25.525	9.78853	6.6855								32.312	6.3194
-33.484	-6.1119			25.525	9.69692	6.7029								32.14	6.3316
-33.523	-6.128			25.525	9.72077	6.7173								32.198	6.3458
-33.618	-6.1481			25.525	9.80045	6.7332								32.117	6.3612
-33.721	-6.1642			25.525	9.87472	6.7452								31.821	6.3789
-33.785	-6.18			25.525	10.007	6.7608								31.064	6.3977
-33.826	-6.196			25.525	10.1653	6.7758								29.861	6.4195
-33.87	-6.2122			25.525	10.3246	6.7919								29.21	6.4345
-33.944	-6.2245			25.525	10.5106	6.8079								28.708	6.4495
-34.051	-6.24			25.525	10.6477	6.824								28.143	6.465
-34.052	-6.26			25.525	10.7491	6.8401								27.594	6.4806
-33.84	-6.2819			25.525	10.7404	6.8567								27.19	6.4933
-33.161	-6.3037			25.525	10.3978	6.8816								26.664	6.5095
-32.312	-6.3194			25.525	10.0471	6.8977								26.136	6.525
-32.14	-6.3316			25.525	9.91754	6.9087								25.578	6.5406
-32.198	-6.3458			25.525	9.94464	6.922								24.92	6.5579
-32.117	-6.3612			25.525	10.0406	6.9364								24.077	6.5749
-31.821	-6.3789			25.525	10.1127	6.9527								22.715	6.5964
-31.064	-6.3977			25.525	10.1571	6.9733								21.702	6.6117
-29.861	-6.4195			25.525	10.1029	6.9907								21.037	6.6253
-29.21	-6.4345			25.525	10.033	7.0029								20.704	6.64
-28.708	-6.4495			25.525	9.94952	7.0189								20.535	6.6512
-28.143	-6.465			25.525	9.87688	7.0308								20.269	6.6674
-27.594	-6.4806			25.525	9.82214	7.0428								19.953	6.6839
-27.19	-6.4933			25.525	9.77823	7.0582								19.559	6.7
-26.664	-6.5095			25.525	9.801	7.0704								19.051	6.7169
-26.136	-6.525			25.525	9.91429	7.0892								18.506	6.7338
-25.578	-6.5406			25.525	10.027	7.1047								18.058	6.7497
-24.92	-6.5579			25.525	10.1978	7.1283								17.889	6.7671
-24.077	-6.5749			25.525	10.3235	7.1445								17.933	6.7815
-22.715	-6.5964			25.525	10.5219	7.1604								18.08	6.7974
-21.702	-6.6117			25.525	10.7447	7.1758								18.217	6.8094
-21.037	-6.6253			25.525	10.9816	7.1916								18.461	6.825
-20.704	-6.64			25.525	11.2044	7.2077								18.753	6.84
-20.535	-6.6512			25.525	11.4592	7.2278								19.047	6.8561
-20.269	-6.6674			25.525	11.6847	7.244								19.39	6.8721
-19.953	-6.6839			25.525	11.927	7.26								19.643	6.8882
-19.559	-6.7			25.525	12.1194	7.2717								19.83	6.9043
-19.051	-6.7169			25.525	12.4013	7.2879								19.814	6.9209
-18.506	-6.7338			25.525	12.6913	7.3041								19.182	6.9458
-18.058	-6.7497			25.525	12.8875	7.32								18.535	6.9619
-17.889	-6.7671			25.525	13.062	7.3358								18.296	6.9729
-17.933	-6.7815			25.525	13.2322	7.3517								18.346	6.9862
-18.08	-6.7974			25.525	13.4122	7.368								18.523	7.0006
-18.217	-6.8094			25.525	13.5526	7.3841								18.656	7.0169
-18.461	-6.825			25.525	13.6805	7.4042								18.738	7.0375
-18.753	-6.84			25.525	13.7835	7.4202								18.638	7.0549
-19.047	-6.8561			25.525	13.8312	7.4319								18.509	7.0671
-19.39	-6.8721			25.525	13.8908	7.4481								18.355	7.0831
-19.643	-6.8882			25.525	13.9825	7.4644								18.221	7.095
-19.83	-6.9043			25.525	14.0995	7.4806								18.12	7.107
-19.814	-6.9209			25.525	14.2134	7.4958								18.039	7.1224
-19.182	-6.9458			25.525	14.2779	7.5122								18.081	7.1346
-18.535	-6.9619			25.525	14.2773	7.5284								18.29	7.1534
-18.296	-6.9729			25.525	14.2714	7.5448								18.498	7.1689
-18.346	-6.9862			25.525	14.221	7.5608								18.813	7.1925
-18.523	-7.0006			25.525	14.1841	7.5808								19.045	7.2087
-18.656	-7.0169			25.525	14.2096	7.593								19.411	7.2246
-18.738	-7.0375			25.525	14.2448	7.6054								19.822	7.24
-18.638	-7.0549			25.525	14.2752	7.6256								20.259	7.2558
-18.509	-7.0671			25.525	14.3012	7.6408								20.67	7.2719
-18.355	-7.0831			25.525	14.2345	7.6571								21.14	7.292
-18.221	-7.095			25.525	14.0117	7.6747								21.556	7.3082
-18.12	-7.107			25.525	13.5363	7.7012								22.003	7.3242
-18.039	-7.1224			25.525	12.8989	7.7108								22.358	7.3359
-18.081	-7.1346			25.525	13.0257	7.723								22.878	7.3521
-18.29	-7.1534			25.525	13.2545	7.7369								23.413	7.3683
-18.498	-7.1689			25.525	13.3022	7.7521								23.775	7.3842
-18.813	-7.1925			25.525	13.2805	7.7648								24.097	7.4
-19.045	-7.2087			25.525	13.1986	7.7808								24.411	7.4159
-19.411	-7.2246			25.525	13.0333	7.7979								24.743	7.4322
-19.822	-7.24			25.525	12.4034	7.8247								25.002	7.4483
-20.259	-7.2558			25.525	11.6586	7.8408								25.238	7.4684
-20.67	-7.2719			25.525	11.335	7.8543								25.428	7.4844
-21.14	-7.292			25.525	11.2315	7.8676								25.516	7.4961
-21.556	-7.3082			25.525	10.9496	7.8839								25.626	7.5123
-22.003	-7.3242			25.525	10.0037	7.9085								25.795	7.5286
-22.358	-7.3359			25.525	9.14944	7.922								26.011	7.5448
-22.878	-7.3521			25.525	8.58678	7.9308								26.221	7.56
-23.413	-7.3683			25.525	8.77488	7.9423								26.34	7.5764
-23.775	-7.3842			25.525	9.20581	7.9569								26.339	7.5926
-24.097	-7.4			25.525	9.65193	7.973								26.328	7.609
-24.411	-7.4159			25.525	9.93217	7.992								26.235	7.625
-24.743	-7.4322			25.525	9.98367	8.0085								26.167	7.645
-25.002	-7.4483			25.525	9.96632	8.0247								26.214	7.6572
-25.238	-7.4684			25.525	9.80696	8.0409								26.279	7.6696
-25.428	-7.4844			25.525	9.48226	8.0585								26.335	7.6898
-25.516	-7.4961			25.525	8.94237	8.0722								26.383	7.705
-25.626	-7.5123			25.525	6.24291	8.1158								26.26	7.7213
-25.795	-7.5286			25.525	5.04496	8.1158								25.849	7.7389
-26.011	-7.5448			25.525	5.13873	8.1172								24.972	7.7654
-26.221	-7.56			25.525	5.82444	8.1348								23.796	7.775
-26.34	-7.5764			25.525	6.45431	8.1478								24.03	7.7872
-26.339	-7.5926			25.525	7.02944	8.1676								24.452	7.8011
-26.328	-7.609			25.525	7.2235	8.1884								24.54	7.8163
-26.235	-7.625			25.525	7.36227	8.2027								24.5	7.829
-26.167	-7.645			25.525	7.51946	8.22								24.349	7.845
-26.214	-7.6572			25.525	7.78345	8.2356								24.044	7.8621
-26.279	-7.6696			25.525	8.09079	8.2558								22.882	7.8889
-26.335	-7.6898			25.525	8.39543	8.2722								21.508	7.905
-26.383	-7.705			25.525	8.69194	8.2872								20.911	7.9185
-26.26	-7.7213			25.525	8.97761	8.3044								20.72	7.9318
-25.849	-7.7389			25.525	9.28008	8.3195								20.2	7.9481
-24.972	-7.7654			25.525	9.45408	8.3318								18.455	7.9727
-23.796	-7.775			25.525	9.73378	8.3477								16.879	7.9862
-24.03	-7.7872			25.525	9.98096	8.3642								15.841	7.995
-24.452	-7.8011			25.525	10.2428	8.3802								16.188	8.0065
-24.54	-7.8163			25.525	10.4932	8.3958								16.983	8.0211
-24.5	-7.829			25.525	10.761	8.4123								17.806	8.0372
-24.349	-7.845			25.525	11.0407	8.4319								18.323	8.0562
-24.044	-7.8621			25.525	11.1908	8.4481								18.418	8.0727
-22.882	-7.8889			25.525	11.4093	8.4645								18.386	8.0889
-21.508	-7.905			25.525	11.6044	8.4803								18.092	8.1051
-20.911	-7.9185			25.525	11.7275	8.4924								17.493	8.1227
-20.72	-7.9318			25.525	11.8413	8.5083								16.497	8.1364
-20.2	-7.9481			25.525	11.8516	8.5252								11.517	8.18
-18.455	-7.9727			25.525	11.7741	8.5408								9.307	8.18
-16.879	-7.9862			25.525	11.5838	8.5576								9.48	8.1814
-15.841	-7.995			25.525	10.9979	8.5755								10.745	8.199
-16.188	-8.0065			25.525										11.907	8.212
-16.983	-8.0211													12.968	8.2318
-17.806	-8.0372													13.326	8.2526
-18.323	-8.0562													13.582	8.2669
-18.418	-8.0727													13.872	8.2842
-18.386	-8.0889													14.359	8.2998
-18.092	-8.1051													14.926	8.32
-17.493	-8.1227													15.488	8.3364
-16.497	-8.1364													16.035	8.3514
-11.517	-8.18													16.562	8.3686
-9.307	-8.18													17.12	8.3837
-9.48	-8.1814													17.441	8.396
-10.745	-8.199													17.957	8.4119
-11.907	-8.212													18.413	8.4284
-12.968	-8.2318													18.896	8.4444
-13.326	-8.2526													19.358	8.46
-13.582	-8.2669													19.852	8.4765
-13.872	-8.2842													20.368	8.4961
-14.359	-8.2998													20.645	8.5123
-14.926	-8.32													21.048	8.5287
-15.488	-8.3364													21.408	8.5445
-16.035	-8.3514													21.635	8.5566
-16.562	-8.3686													21.845	8.5725
-17.12	-8.3837													21.864	8.5894
-17.441	-8.396													21.721	8.605
-17.957	-8.4119													21.37	8.6218
-18.413	-8.4284													20.289	8.6397
-18.896	-8.4444													4.046	8.7719
-19.358	-8.46													-0.076	8.6981
-19.852	-8.4765													0.013	8.6945
-20.368	-8.4961													-0.045	8.7087
-20.645	-8.5123													0.084	8.7154
-21.048	-8.5287													0.394	8.7329
-21.408	-8.5445													0.993	8.745
-21.635	-8.5566													1.795	8.7638
-21.845	-8.5725													2.859	8.7784
-21.864	-8.5894													3.633	8.7976
-21.721	-8.605													4.874	8.8123
-21.37	-8.6218													5.625	8.83
-20.289	-8.6397													6.605	8.845
-4.046	-8.7719													6.674	8.845
0.076	-8.6981													6.623	8.85
-0.013	-8.6945													6.545	8.8454
0.045	-8.7087													6.324	8.85
-0.084	-8.7154													6.482	8.845
-0.394	-8.7329													6.32	8.8496
-0.993	-8.745													6.472	8.845
-1.795	-8.7638
-2.859	-8.7784
-3.633	-8.7976
-4.874	-8.8123
-5.625	-8.83
-6.605	-8.845
-6.674	-8.845
-6.623	-8.85
-6.545	-8.8454
-6.324	-8.85
-6.482	-8.845
-6.32	-8.8496
-6.472	-8.845

## Sheet: MA135L80
WORKSHOP 3 EXPORTED DATA: [C:\Users\Maleki\2012-4-14\Ma135l80.w01 - 1]					LOAD(KN)	DISPLACEMENT(mm)									LOAD(KN)	DISPLACEMENT(mm)
*************************************************************************************************				20.253	0	0									-0.011	0.005
Source of data: ToolKit				20.253	0.372424	0.0161									-0.001	0.005
WS3 File Version: 1.04				20.253	0.579934	0.0322									-0.004	0.005
Number of bytes in subfile: 8390				20.253	0.808135	0.0482									-0.009	0.0004
Total number of data points: 1009				20.253	1.04546	0.0642									-0.007	0.005
Test date: 14/05/2012				20.253	1.30044	0.08									-0.004	0.005
Test time: 19:16:03				20.253	1.55724	0.0957									-0.006	0.0014
Player Step: 1				20.253	1.82987	0.1118									-0.01	0.005
Step Capture No: 1				20.253	2.18951	0.1317									-0.001	0.005
Actuator: 1				20.253	2.49134	0.1477									-0.006	0.0005
*************************************************************************************************				20.253	2.82239	0.1636									-0.004	0.0033
Actuator: 1 Channel:0	Actuator: 1 Channel:1			20.253	3.18264	0.18									-0.007	0.005
Load Current (kN)	Stroke Current (mm)			20.253	3.55932	0.195									-0.002	0.005
0.011	-0.005			20.253	3.87881	0.2072									-0.001	0.0044
0.001	-0.005	fc	20.253	20.253	4.3206	0.2231									-0.011	0.0025
0.004	-0.005			20.253	4.80135	0.2397									0	0.005
0.009	-0.0004			20.253	5.32043	0.255									0.001	0.005
0.007	-0.005			20.253	5.88941	0.2708									-0.003	0.0011
0.004	-0.005			20.253	6.48577	0.2869									0.004	0.0005
0.006	-0.0014			20.253	7.258	0.307									-0.005	0.0003
0.01	-0.005			20.253	7.84889	0.3231									0.002	0.005
0.001	-0.005			20.253	8.52254	0.3397									0.006	0.0207
0.006	-0.0005			20.253	9.21262	0.355									0.008	0.0372
0.004	-0.0033			20.253	9.9599	0.3707									0.009	0.0533
0.007	-0.005			20.253	10.7321	0.3868									0.02	0.0694
0.002	-0.005			20.253	11.5397	0.4028									0.018	0.085
0.001	-0.0044			20.253	12.4062	0.4194			MAX LOAD(KN)	@ DISPLACEMENT(mm)					0.019	0.1006
0.011	-0.0025			20.253	13.0957	0.4305			163.226	1.8611					0.022	0.1173
0	-0.005			20.253	14.0706	0.4465			delta ultimate	4.7013					0.025	0.1373
-0.001	-0.005			20.253	15.0813	0.4623									0.027	0.1535
0.003	-0.0011			20.253	16.4256	0.4816									0.028	0.1696
-0.004	-0.0005			20.253	17.6828	0.4979									0.039	0.185
0.005	-0.0003			20.253	18.9906	0.5137									0.056	0.2001
-0.002	-0.005			20.253	20.2265	0.5296									0.066	0.2168
-0.006	-0.0207			20.253	21.4807	0.545									0.088	0.233
-0.008	-0.0372			20.253	22.9899	0.5601									0.092	0.2493
-0.009	-0.0533			20.253	24.3767	0.5765									0.096	0.2604
-0.02	-0.0694			20.253	25.8567	0.5923									0.097	0.2769
-0.018	-0.085			20.253	27.8131	0.6119									0.108	0.2931
-0.019	-0.1006			20.253	29.4604	0.6278									0.11	0.3093
-0.022	-0.1173			20.253	31.1321	0.6434									0.12	0.3202
-0.025	-0.1373			20.253	32.8536	0.6599									0.13	0.3368
-0.027	-0.1535			20.253	34.6415	0.675									0.154	0.3568
-0.028	-0.1696			20.253	36.4945	0.6906									0.177	0.3731
-0.039	-0.185			20.253	38.3767	0.7066									0.176	0.3891
-0.056	-0.2001			20.253	40.2784	0.7225									0.176	0.405
-0.066	-0.2168			20.253	41.7528	0.735									0.175	0.4202
-0.088	-0.233			20.253	43.7129	0.7502									0.177	0.437
-0.092	-0.2493			20.253	45.673	0.7663									0.172	0.4532
-0.096	-0.2604			20.253	48.1516	0.7864									0.178	0.4694
-0.097	-0.2769			20.253	50.1159	0.8024									0.176	0.4893
-0.108	-0.2931			20.253	52.0852	0.819									0.168	0.505
-0.11	-0.3093			20.253	54.097	0.835									0.16	0.5202
-0.12	-0.3202			20.253	56.1125	0.85									0.161	0.5369
-0.13	-0.3368			20.253	58.1547	0.866									0.162	0.553
-0.154	-0.3568			20.253	60.1909	0.882									0.163	0.565
-0.177	-0.3731			20.253	62.2538	0.8986									0.17	0.5802
-0.176	-0.3891			20.253	64.848	0.9185									0.167	0.5969
-0.176	-0.405			20.253	66.4125	0.93									0.174	0.613
-0.175	-0.4202			20.253	67.9655	0.9416									0.17	0.6292
-0.177	-0.437			20.253	70.5694	0.9614									0.166	0.645
-0.172	-0.4532			20.253	72.706	0.9779									0.175	0.665
-0.178	-0.4694			20.253	74.828	0.9941									0.177	0.68
-0.176	-0.4893			20.253	76.9603	1.01									0.175	0.6968
-0.168	-0.505			20.253	79.0658	1.025									0.174	0.713
-0.16	-0.5202			20.253	81.147	1.0411									0.172	0.7291
-0.161	-0.5369			20.253	83.2598	1.0576									0.177	0.745
-0.162	-0.553			20.253	85.3775	1.0735									0.177	0.76
-0.163	-0.565			20.253	88.0514	1.0932									0.183	0.7767
-0.17	-0.5802			20.253	90.2093	1.1091									0.182	0.7967
-0.167	-0.5969			20.253	92.3386	1.1248									0.183	0.8129
-0.174	-0.613			20.253	94.4831	1.14									0.186	0.829
-0.17	-0.6292			20.253	96.6312	1.1561									0.183	0.845
-0.166	-0.645			20.253	98.2517	1.1683									0.189	0.86
-0.175	-0.665			20.253	100.377	1.184									0.191	0.8766
-0.177	-0.68			20.253	102.473	1.2									0.191	0.8928
-0.175	-0.6968			20.253	104.142	1.215									0.189	0.909
-0.174	-0.713			20.253	105.819	1.2272									0.188	0.929
-0.172	-0.7291			20.253	107.459	1.24									0.193	0.9449
-0.177	-0.745			20.253	110.373	1.2615									0.195	0.96
-0.177	-0.76			20.253	112.525	1.2796									0.198	0.9767
-0.183	-0.7767			20.253	114.703	1.2964									0.193	0.9928
-0.182	-0.7967			20.253	117.243	1.3178									0.191	1.0089
-0.183	-0.8129			20.253	119.107	1.3339									0.192	1.0249
-0.186	-0.829			20.253	121.405	1.3532									0.202	1.04
-0.183	-0.845			20.253	123.262	1.3687									0.206	1.06
-0.189	-0.86			20.253	125.058	1.3843									0.205	1.0766
-0.191	-0.8766			20.253	126.842	1.4									0.204	1.0889
-0.191	-0.8928			20.253	128.686	1.4153									0.205	1.105
-0.189	-0.909			20.253	130.491	1.4316									0.207	1.12
-0.188	-0.929			20.253	132.296	1.4476									0.207	1.1366
-0.193	-0.9449			20.253	134.401	1.4645									0.204	1.1528
-0.195	-0.96			20.253	137.195	1.4866									0.204	1.169
-0.198	-0.9767			20.253	139.158	1.5039									0.209	1.1849
-0.193	-0.9928			20.253	141.037	1.52									0.211	1.2
-0.191	-1.0089			20.253	142.919	1.5366									0.214	1.2166
-0.192	-1.0249			20.253	144.324	1.549									0.215	1.2366
-0.202	-1.04			20.253	146.139	1.565									0.216	1.2529
-0.206	-1.06			20.253	147.996	1.5802									0.218	1.269
-0.205	-1.0766			20.253	149.834	1.5968									0.214	1.285
-0.204	-1.0889			20.253	151.55	1.6132									0.213	1.3
-0.205	-1.105			20.253	153.153	1.6293									0.214	1.3167
-0.207	-1.12			20.253	154.532	1.645									0.212	1.3328
-0.207	-1.1366			20.253	155.893	1.665									0.211	1.349
-0.204	-1.1528			20.253	157.055	1.6807									0.215	1.369
-0.204	-1.169			20.253	158.275	1.6973									0.221	1.385
-0.209	-1.1849			20.253	159.521	1.7134									0.215	1.3966
-0.211	-1.2			20.253	160.67	1.7295									0.217	1.4128
-0.214	-1.2166			20.253	161.434	1.745									0.215	1.429
-0.215	-1.2366			20.253	161.875	1.761									0.216	1.445
-0.216	-1.2529			20.253	161.926	1.7781									0.22	1.46
-0.218	-1.269			20.253	161.979	1.7981									0.217	1.4766
-0.214	-1.285			20.253	162.349	1.8142									0.226	1.4928
-0.213	-1.3			20.253	162.726	1.83									0.218	1.509
-0.214	-1.3167			20.253	163.134	1.845									0.214	1.525
-0.212	-1.3328			20.253	163.226	1.8611									0.222	1.545
-0.211	-1.349			20.253	163.176	1.8778									0.224	1.56
-0.215	-1.369			20.253	162.929	1.8942									0.218	1.5767
-0.221	-1.385			20.253	162.564	1.9099									0.217	1.5928
-0.215	-1.3966			20.253	162.135	1.9294									0.222	1.605
-0.217	-1.4128			20.253	161.711	1.945									0.219	1.62
-0.215	-1.429			20.253	161.131	1.9604									0.212	1.6366
-0.216	-1.445			20.253	160.537	1.9737									0.218	1.6527
-0.22	-1.46			20.253	159.282	1.99									0.226	1.6689
-0.217	-1.4766			20.253	157.38	2.0073									0.224	1.6849
-0.226	-1.4928			20.253	155.068	2.0244									0.222	1.7
-0.218	-1.509			20.253	152.806	2.0403									0.226	1.72
-0.214	-1.525			20.253	137.007	2.2206									0.231	1.7366
-0.222	-1.545			20.253	106.354	2.147									0.23	1.7528
-0.224	-1.56			20.253	94.9388	2.1141									0.228	1.769
-0.218	-1.5767			20.253	93.4437	2.1185									0.22	1.785
-0.217	-1.5928			20.253	95.5121	2.1204									0.226	1.8
-0.222	-1.605			20.253	99.1511	2.1393									0.232	1.8129
-0.219	-1.62			20.253	102.804	2.1446									0.224	1.829
-0.212	-1.6366			20.253	107.075	2.16									0.234	1.845
-0.218	-1.6527			20.253	112.953	2.175									0.236	1.86
-0.226	-1.6689			20.253	118.024	2.19									0.235	1.8766
-0.224	-1.6849			20.253	123.059	2.2081									0.238	1.8967
-0.222	-1.7			20.253	128.183	2.2283									0.245	1.9128
-0.226	-1.72			20.253	130.912	2.2476									0.249	1.929
-0.231	-1.7366			20.253	132.743	2.2645									0.25	1.945
-0.23	-1.7528			20.253	132.35	2.2782									0.245	1.96
-0.228	-1.769			20.253	131.547	2.2961									0.249	1.9766
-0.22	-1.785			20.253	129.654	2.3106									0.247	1.9928
-0.226	-1.8			20.253	127.482	2.3346									0.249	2.009
-0.232	-1.8129			20.253	121.79	2.3701									0.25	2.029
-0.224	-1.829			20.253	117.306	2.375									0.245	2.045
-0.234	-1.845			20.253	117.172	2.3789									0.241	2.06
-0.236	-1.86			20.253	119.182	2.3902									0.245	2.0766
-0.235	-1.8766			20.253	121.738	2.41									0.234	2.0929
-0.238	-1.8967			20.253	122.064	2.4332									0.237	2.1089
-0.245	-1.9128			20.253	115.032	2.465									0.232	2.12
-0.249	-1.929			20.253	112.355	2.4718									0.232	2.1366
-0.25	-1.945			20.253	112.351	2.4798									0.223	2.1529
-0.245	-1.96			20.253	114.213	2.4912									0.218	2.169
-0.249	-1.9766			20.253	115.734	2.5077									0.222	2.185
-0.247	-1.9928			20.253	114.699	2.5414									0.229	2.2049
-0.249	-2.009			20.253	108.145	2.5667									0.34	2.22
-0.25	-2.029			20.253	104.96	2.5808									0.612	2.2361
-0.245	-2.045			20.253	102.922	2.5916									0.953	2.2522
-0.241	-2.06			20.253	102.698	2.5981									1.328	2.2682
-0.245	-2.0766			20.253	103.678	2.6076									1.718	2.2842
-0.234	-2.0929			20.253	106.076	2.62									2.137	2.3
-0.237	-2.1089			20.253	108.525	2.6338									2.559	2.3157
-0.232	-2.12			20.253	110	2.65									3.007	2.3318
-0.232	-2.1366			20.253	108.379	2.6877									3.598	2.3517
-0.223	-2.1529			20.253	102.474	2.7061									4.094	2.3677
-0.218	-2.169			20.253	99.8509	2.715									4.638	2.3836
-0.222	-2.185			20.253	99.4219	2.7288									5.23	2.4
-0.229	-2.2049			20.253	100.637	2.7393									5.849	2.415
-0.34	-2.22			20.253	101.998	2.75									6.374	2.4272
-0.612	-2.2361			20.253	103.506	2.765									7.1	2.4431
-0.953	-2.2522			20.253	103.834	2.7893									7.89	2.4597
-1.328	-2.2682			20.253	100.007	2.815									8.743	2.475
-1.718	-2.2842			20.253	98.0387	2.83									9.678	2.4908
-2.137	-2.3			20.253	96.9659	2.8443									10.658	2.5069
-2.559	-2.3157			20.253	96.4194	2.86									11.927	2.527
-3.007	-2.3318			20.253	96.6902	2.8771									12.898	2.5431
-3.598	-2.3517			20.253	96.0007	2.8969									14.005	2.5597
-4.094	-2.3677			20.253	94.5628	2.9109									15.139	2.575
-4.638	-2.3836			20.253	92.3465	2.925									16.367	2.5907
-5.23	-2.4			20.253	90.6907	2.9397									17.636	2.6068
-5.849	-2.415			20.253	89.0318	2.9539									18.963	2.6228
-6.374	-2.4272			20.253	87.4435	2.9693									20.387	2.6394
-7.1	-2.4431			20.253	85.8212	2.985									21.52	2.6505
-7.89	-2.4597			20.253	83.5714	3.0027									23.122	2.6665
-8.743	-2.475			20.253	80.0242	3.0218									24.783	2.6823
-9.678	-2.4908			20.253	75.0665	3.0418									26.992	2.7016
-10.658	-2.5069			20.253	66.6998	3.0675									29.058	2.7179
-11.927	-2.527			20.253	58.9172	3.085									31.207	2.7337
-12.898	-2.5431			20.253	52.8264	3.0983									33.238	2.7496
-14.005	-2.5597			20.253	48.2617	3.11									35.299	2.765
-15.139	-2.575			20.253	45.7083	3.12									37.779	2.7801
-16.367	-2.5907			20.253	42.8677	3.135									40.058	2.7965
-17.636	-2.6068			20.253	40.5845	3.1492									42.49	2.8123
-18.963	-2.6228			20.253	38.8398	3.1634									45.705	2.8319
-20.387	-2.6394			20.253	37.4754	3.1787									48.412	2.8478
-21.52	-2.6505			20.253	36.2821	3.1943									51.159	2.8634
-23.122	-2.6665			20.253	35.264	3.2099									53.988	2.8799
-24.783	-2.6823			20.253	34.1358	3.2294									56.926	2.895
-26.992	-2.7016			20.253	33.2875	3.245									59.971	2.9106
-29.058	-2.7179			20.253	32.365	3.26									63.064	2.9266
-31.207	-2.7337			20.253	31.7339	3.2717									66.189	2.9425
-33.238	-2.7496			20.253	30.9106	3.287									68.612	2.955
-35.299	-2.765			20.253	30.069	3.3026									71.833	2.9702
-37.779	-2.7801			20.253	29.4549	3.315									75.054	2.9863
-40.058	-2.7965			20.253	28.7703	3.33									79.127	3.0064
-42.49	-2.8123			20.253	28.2872	3.345									82.355	3.0224
-45.705	-2.8319			20.253	27.902	3.3603									85.591	3.039
-48.412	-2.8478			20.253	27.5235	3.3769									88.897	3.055
-51.159	-2.8634			20.253	27.1875	3.3929									92.209	3.07
-53.988	-2.8799			20.253	26.8242	3.4091									95.565	3.086
-56.926	-2.895			20.253	26.4019	3.425									98.911	3.102
-59.971	-2.9106			20.253	26.0027	3.445									102.301	3.1186
-63.064	-2.9266			20.253	25.7179	3.4601									106.564	3.1385
-66.189	-2.9425			20.253	25.3376	3.477									109.135	3.15
-68.612	-2.955			20.253	25.0412	3.4894									111.687	3.1616
-71.833	-2.9702			20.253	24.6998	3.505									115.966	3.1814
-75.054	-2.9863			20.253	24.4485	3.5169									119.477	3.1979
-79.127	-3.0064			20.253	24.1205	3.5331									122.964	3.2141
-82.355	-3.0224			20.253	23.7968	3.545									126.468	3.23
-85.591	-3.039			20.253	23.5686	3.557									129.928	3.245
-88.897	-3.055			20.253	23.4031	3.5764									133.348	3.2611
-92.209	-3.07			20.253	23.2558	3.5926									136.82	3.2776
-95.565	-3.086			20.253	23.1475	3.6087									140.3	3.2935
-98.911	-3.102			20.253	23.0306	3.62									144.694	3.3132
-102.301	-3.1186			20.253	22.9241	3.64									148.24	3.3291
-106.564	-3.1385			20.253	22.9095	3.6561									151.739	3.3448
-109.135	-3.15			20.253	22.912	3.6723									155.263	3.36
-111.687	-3.1616			20.253	22.9333	3.6883									158.793	3.3761
-115.966	-3.1814			20.253	22.9686	3.7045									161.456	3.3883
-119.477	-3.1979			20.253	23.0099	3.7161									164.949	3.404
-122.964	-3.2141			20.253	23.1542	3.7319									168.393	3.42
-126.468	-3.23			20.253	23.2479	3.7521									171.136	3.435
-129.928	-3.245			20.253	23.2826	3.7684									173.891	3.4472
-133.348	-3.2611			20.253	23.2546	3.7846									176.586	3.46
-136.82	-3.2776			20.253	23.2095	3.8									181.374	3.4815
-140.3	-3.2935			20.253	23.1901	3.8164									184.911	3.4996
-144.694	-3.3132			20.253	23.1463	3.8326									188.491	3.5164
-148.24	-3.3291			20.253	23.131	3.8486									192.664	3.5378
-151.739	-3.3448			20.253	23.1317	3.86									195.727	3.5539
-155.263	-3.36			20.253	23.1517	3.8763									199.504	3.5732
-158.793	-3.3761			20.253	23.1256	3.8926									202.555	3.5887
-161.456	-3.3883			20.253	23.0775	3.9088									205.506	3.6043
-164.949	-3.404			20.253	23.0148	3.9289									208.438	3.62
-168.393	-3.42			20.253	22.9296	3.945									211.468	3.6353
-171.136	-3.435			20.253	22.8043	3.9601									214.435	3.6516
-173.891	-3.4472			20.253	22.713	3.9766									217.401	3.6676
-176.586	-3.46			20.253	22.6381	3.9929									220.86	3.6845
-181.374	-3.4815			20.253	22.5907	4.009									225.451	3.7066
-184.911	-3.4996			20.253	22.5578	4.02									228.677	3.7239
-188.491	-3.5164			20.253	22.6114	4.0364									231.764	3.74
-192.664	-3.5378			20.253	22.6357	4.0526									234.858	3.7566
-195.727	-3.5539			20.253	22.601	4.069									237.166	3.769
-199.504	-3.5732			20.253	22.6174	4.0848									240.148	3.785
-202.555	-3.5887			20.253	22.6655	4.1047									243.2	3.8002
-205.506	-3.6043			20.253	22.6759	4.12									246.22	3.8168
-208.438	-3.62			20.253	22.6606	4.1367									249.041	3.8332
-211.468	-3.6353			20.253	22.7258	4.1525									251.675	3.8493
-214.435	-3.6516			20.253	22.8901	4.1684									253.94	3.865
-217.401	-3.6676			20.253	22.9394	4.18									256.177	3.885
-220.86	-3.6845			20.253	23.0087	4.1963									258.086	3.9007
-225.451	-3.7066			20.253	23.0897	4.2125									260.092	3.9173
-228.677	-3.7239			20.253	23.1043	4.2288									262.139	3.9334
-231.764	-3.74			20.253	23.0532	4.24									264.027	3.9495
-234.858	-3.7566			20.253	22.9978	4.2568									265.282	3.965
-237.166	-3.769			20.253	22.9759	4.2729									266.008	3.981
-240.148	-3.785			20.253	23.0312	4.2848									266.092	3.9981
-243.2	-3.8002			20.253	23.1493	4.3									266.179	4.0181
-246.22	-3.8168			20.253	23.2826	4.3162									266.786	4.0342
-249.041	-3.8332			20.253	23.4292	4.3324									267.406	4.05
-251.675	-3.8493			20.253	23.4603	4.3447									268.076	4.065
-253.94	-3.865			20.253	23.4852	4.36									268.227	4.0811
-256.177	-3.885			20.253	23.4901	4.3766									268.145	4.0978
-258.086	-3.9007			20.253	23.459	4.3929									267.739	4.1142
-260.092	-3.9173			20.253	23.3331	4.4132									267.139	4.1299
-262.139	-3.9334			20.253	23.1895	4.4294									266.435	4.1494
-264.027	-3.9495			20.253	23.0592	4.445									265.738	4.165
-265.282	-3.965			20.253	22.9302	4.4604									264.785	4.1804
-266.008	-3.981			20.253	22.8383	4.4771									263.809	4.1937
-266.092	-3.9981			20.253	22.6187	4.4935									261.746	4.21
-266.179	-4.0181			20.253	22.0984	4.51									258.621	4.2273
-266.786	-4.0342			20.253	21.3833	4.5262									254.821	4.2444
-267.406	-4.05			20.253	20.5527	4.5462									251.105	4.2603
-268.076	-4.065			20.253	20.1961	4.5584									225.142	4.4406
-268.227	-4.0811			20.253	19.9314	4.57									174.771	4.367
-268.145	-4.0978			20.253	19.5212	4.59									156.012	4.3341
-267.739	-4.1142			20.253	19.1202	4.6052									153.555	4.3385
-267.139	-4.1299			20.253	18.7551	4.6212									156.954	4.3404
-266.435	-4.1494			20.253	18.4958	4.6376									162.934	4.3593
-265.738	-4.165			20.253	18.3041	4.6535									168.937	4.3646
-264.785	-4.1804			20.253	18.0565	4.6698									175.955	4.38
-263.809	-4.1937			20.253	17.698	4.6852									185.615	4.395
-261.746	-4.21			20.253	17.2946	4.7013									193.948	4.41
-258.621	-4.2273			20.253											202.222	4.4281
-254.821	-4.2444			20.253											210.641	4.4483
-251.105	-4.2603			20.253											215.126	4.4676
-225.142	-4.4406			20.253											218.135	4.4845
-174.771	-4.367			20.253											217.49	4.4982
-156.012	-4.3341			20.253											216.17	4.5161
-153.555	-4.3385			20.253											213.059	4.5306
-156.954	-4.3404			20.253											209.489	4.5546
-162.934	-4.3593			20.253											200.137	4.5901
-168.937	-4.3646			20.253											192.767	4.595
-175.955	-4.38			20.253											192.548	4.5989
-185.615	-4.395			20.253											195.85	4.6102
-193.948	-4.41			20.253											200.051	4.63
-202.222	-4.4281			20.253											200.587	4.6532
-210.641	-4.4483			20.253											189.031	4.685
-215.126	-4.4676			20.253											184.632	4.6918
-218.135	-4.4845			20.253											184.626	4.6998
-217.49	-4.4982			20.253											187.685	4.7112
-216.17	-4.5161			20.253											190.184	4.7277
-213.059	-4.5306			20.253											188.483	4.7614
-209.489	-4.5546			20.253											177.714	4.7867
-200.137	-4.5901			20.253											172.479	4.8008
-192.767	-4.595			20.253											169.131	4.8116
-192.548	-4.5989			20.253											168.763	4.8181
-195.85	-4.6102			20.253											170.373	4.8276
-200.051	-4.63			20.253											174.314	4.84
-200.587	-4.6532			20.253											178.338	4.8538
-189.031	-4.685			20.253											180.762	4.87
-184.632	-4.6918			20.253											178.098	4.9077
-184.626	-4.6998			20.253											168.394	4.9261
-187.685	-4.7112			20.253											164.084	4.935
-190.184	-4.7277			20.253											163.379	4.9488
-188.483	-4.7614			20.253											165.376	4.9593
-177.714	-4.7867			20.253											167.613	4.97
-172.479	-4.8008			20.253											170.091	4.985
-169.131	-4.8116			20.253											170.63	5.0093
-168.763	-4.8181			20.253											164.34	5.035
-170.373	-4.8276			20.253											161.106	5.05
-174.314	-4.84			20.253											159.343	5.0643
-178.338	-4.8538			20.253											158.445	5.08
-180.762	-4.87			20.253											158.89	5.0971
-178.098	-4.9077			20.253											157.757	5.1169
-168.394	-4.9261			20.253											155.394	5.1309
-164.084	-4.935			20.253											151.752	5.145
-163.379	-4.9488			20.253											149.031	5.1597
-165.376	-4.9593			20.253											146.305	5.1739
-167.613	-4.97			20.253											143.695	5.1893
-170.091	-4.985			20.253											141.029	5.205
-170.63	-5.0093			20.253											137.332	5.2227
-164.34	-5.035			20.253											131.503	5.2418
-161.106	-5.05			20.253											123.356	5.2618
-159.343	-5.0643			20.253											109.607	5.2875
-158.445	-5.08			20.253											96.818	5.305
-158.89	-5.0971			20.253											86.809	5.3183
-157.757	-5.1169			20.253											79.308	5.33
-155.394	-5.1309			20.253											75.112	5.34
-151.752	-5.145			20.253											70.444	5.355
-149.031	-5.1597			20.253											66.692	5.3692
-146.305	-5.1739			20.253											63.825	5.3834
-143.695	-5.1893			20.253											61.583	5.3987
-141.029	-5.205			20.253											59.622	5.4143
-137.332	-5.2227			20.253											57.949	5.4299
-131.503	-5.2418			20.253											56.095	5.4494
-123.356	-5.2618			20.253											54.701	5.465
-109.607	-5.2875			20.253											53.185	5.48
-96.818	-5.305			20.253											52.148	5.4917
-86.809	-5.3183			20.253											50.795	5.507
-79.308	-5.33			20.253											49.412	5.5226
-75.112	-5.34			20.253											48.403	5.535
-70.444	-5.355			20.253											47.278	5.55
-66.692	-5.3692			20.253											46.484	5.565
-63.825	-5.3834			20.253											45.851	5.5803
-61.583	-5.3987			20.253											45.229	5.5969
-59.622	-5.4143			20.253											44.677	5.6129
-57.949	-5.4299			20.253											44.08	5.6291
-56.095	-5.4494			20.253											43.386	5.645
-54.701	-5.465			20.253											42.73	5.665
-53.185	-5.48			20.253											42.262	5.6801
-52.148	-5.4917			20.253											41.637	5.697
-50.795	-5.507			20.253											41.15	5.7094
-49.412	-5.5226			20.253											40.589	5.725
-48.403	-5.535			20.253											40.176	5.7369
-47.278	-5.55			20.253											39.637	5.7531
-46.484	-5.565			20.253											39.105	5.765
-45.851	-5.5803			20.253											38.73	5.777
-45.229	-5.5969			20.253											38.458	5.7964
-44.677	-5.6129			20.253											38.216	5.8126
-44.08	-5.6291			20.253											38.038	5.8287
-43.386	-5.645			20.253											37.846	5.84
-42.73	-5.665			20.253											37.671	5.86
-42.262	-5.6801			20.253											37.647	5.8761
-41.637	-5.697			20.253											37.651	5.8923
-41.15	-5.7094			20.253											37.686	5.9083
-40.589	-5.725			20.253											37.744	5.9245
-40.176	-5.7369			20.253											37.812	5.9361
-39.637	-5.7531			20.253											38.049	5.9519
-39.105	-5.765			20.253											38.203	5.9721
-38.73	-5.777			20.253											38.26	5.9884
-38.458	-5.7964			20.253											38.214	6.0046
-38.216	-5.8126			20.253											38.14	6.02
-38.038	-5.8287			20.253											38.108	6.0364
-37.846	-5.84			20.253											38.036	6.0526
-37.671	-5.86			20.253											38.011	6.0686
-37.647	-5.8761			20.253											38.012	6.08
-37.651	-5.8923			20.253											38.045	6.0963
-37.686	-5.9083			20.253											38.002	6.1126
-37.744	-5.9245			20.253											37.923	6.1288
-37.812	-5.9361			20.253											37.82	6.1489
-38.049	-5.9519			20.253											37.68	6.165
-38.203	-5.9721			20.253											37.474	6.1801
-38.26	-5.9884			20.253											37.324	6.1966
-38.214	-6.0046			20.253											37.201	6.2129
-38.14	-6.02			20.253											37.123	6.229
-38.108	-6.0364			20.253											37.069	6.24
-38.036	-6.0526			20.253											37.157	6.2564
-38.011	-6.0686			20.253											37.197	6.2726
-38.012	-6.08			20.253											37.14	6.289
-38.045	-6.0963			20.253											37.167	6.3048
-38.002	-6.1126			20.253											37.246	6.3247
-37.923	-6.1288			20.253											37.263	6.34
-37.82	-6.1489			20.253											37.238	6.3567
-37.68	-6.165			20.253											37.345	6.3725
-37.474	-6.1801			20.253											37.615	6.3884
-37.324	-6.1966			20.253											37.696	6.4
-37.201	-6.2129			20.253											37.81	6.4163
-37.123	-6.229			20.253											37.943	6.4325
-37.069	-6.24			20.253											37.967	6.4488
-37.157	-6.2564			20.253											37.883	6.46
-37.197	-6.2726			20.253											37.792	6.4768
-37.14	-6.289			20.253											37.756	6.4929
-37.167	-6.3048			20.253											37.847	6.5048
-37.246	-6.3247			20.253											38.041	6.52
-37.263	-6.34			20.253											38.26	6.5362
-37.238	-6.3567			20.253											38.501	6.5524
-37.345	-6.3725			20.253											38.552	6.5647
-37.615	-6.3884			20.253											38.593	6.58
-37.696	-6.4			20.253											38.601	6.5966
-37.81	-6.4163			20.253											38.55	6.6129
-37.943	-6.4325			20.253											38.343	6.6332
-37.967	-6.4488			20.253											38.107	6.6494
-37.883	-6.46			20.253											37.893	6.665
-37.792	-6.4768			20.253											37.681	6.6804
-37.756	-6.4929			20.253											37.53	6.6971
-37.847	-6.5048			20.253											37.169	6.7135
-38.041	-6.52			20.253											36.314	6.73
-38.26	-6.5362			20.253											35.139	6.7462
-38.501	-6.5524			20.253											33.774	6.7662
-38.552	-6.5647			20.253											33.188	6.7784
-38.593	-6.58			20.253											32.753	6.79
-38.601	-6.5966			20.253											32.079	6.81
-38.55	-6.6129			20.253											31.42	6.8252
-38.343	-6.6332			20.253											30.82	6.8412
-38.107	-6.6494			20.253											30.394	6.8576
-37.893	-6.665			20.253											30.079	6.8735
-37.681	-6.6804			20.253											29.672	6.8898
-37.53	-6.6971			20.253											29.083	6.9052
-37.169	-6.7135			20.253											28.42	6.9213
-36.314	-6.73			20.253											27.795	6.941
-35.139	-6.7462			20.253											27.609	6.9572
-33.774	-6.7662			20.253											27.497	6.9732
-33.188	-6.7784			20.253											27.423	6.985
-32.753	-6.79			20.253											27.375	7.0001
-32.079	-6.81			20.253											27.404	7.0168
-31.42	-6.8252			20.253											27.424	7.0329
-30.82	-6.8412			20.253											27.44	7.0494
-30.394	-6.8576			20.253											27.362	7.065
-30.079	-6.8735			20.253											27.249	7.0805
-29.672	-6.8898			20.253											27.056	7.0973
-29.083	-6.9052			20.253											26.798	7.1175
-28.42	-6.9213			20.253											26.658	7.1336
-27.795	-6.941			20.253											26.556	7.1497
-27.609	-6.9572			20.253											26.654	7.165
-27.497	-6.9732			20.253											26.805	7.1803
-27.423	-6.985			20.253											26.883	7.1932
-27.375	-7.0001			20.253											26.928	7.2094
-27.404	-7.0168			20.253											26.942	7.225
-27.424	-7.0329			20.253											26.896	7.2406
-27.44	-7.0494			20.253											26.876	7.2573
-27.362	-7.065			20.253											26.861	7.2734
-27.249	-7.0805			20.253											26.676	7.2936
-27.056	-7.0973			20.253											26.574	7.3097
-26.798	-7.1175			20.253											26.577	7.325
-26.658	-7.1336			20.253											26.612	7.3403
-26.556	-7.1497			20.253											26.705	7.3569
-26.654	-7.165			20.253											26.81	7.3731
-26.805	-7.1803			20.253											26.93	7.389
-26.883	-7.1932			20.253											27.08	7.4
-26.928	-7.2094			20.253											27.348	7.4164
-26.942	-7.225			20.253											27.613	7.4326
-26.896	-7.2406			20.253											27.896	7.4486
-26.876	-7.2573			20.253											28.25	7.4686
-26.861	-7.2734			20.253											28.529	7.4847
-26.676	-7.2936			20.253											28.67	7.5
-26.574	-7.3097			20.253											28.759	7.5167
-26.577	-7.325			20.253											28.655	7.5332
-26.612	-7.3403			20.253											28.689	7.5491
-26.705	-7.3569			20.253											28.815	7.565
-26.81	-7.3731			20.253											28.98	7.58
-26.93	-7.389			20.253											29.068	7.6001
-27.08	-7.4			20.253											29.165	7.6167
-27.348	-7.4164			20.253											29.299	7.6329
-27.613	-7.4326			20.253											29.376	7.6493
-27.896	-7.4486			20.253											29.35	7.665
-28.25	-7.4686			20.253											29.28	7.6807
-28.529	-7.4847			20.253											29.242	7.6973
-28.67	-7.5			20.253											29.181	7.7098
-28.759	-7.5167			20.253											29.077	7.725
-28.655	-7.5332			20.253											28.973	7.7409
-28.689	-7.5491			20.253											28.932	7.7573
-28.815	-7.565			20.253											29.002	7.7772
-28.98	-7.58			20.253											29.046	7.7934
-29.068	-7.6001			20.253											29.002	7.8098
-29.165	-7.6167			20.253											28.994	7.825
-29.299	-7.6329			20.253											28.936	7.8408
-29.376	-7.6493			20.253											28.905	7.8575
-29.35	-7.665			20.253											28.941	7.8697
-29.28	-7.6807			20.253											28.924	7.885
-29.242	-7.6973			20.253											28.897	7.9007
-29.181	-7.7098			20.253											28.905	7.9136
-29.077	-7.725			20.253											28.85	7.9298
-28.973	-7.7409			20.253											28.756	7.945
-28.932	-7.7573			20.253											28.677	7.9609
-29.002	-7.7772			20.253											28.647	7.9776
-29.046	-7.7934			20.253											28.609	7.994
-29.002	-7.8098			20.253											28.488	8.014
-28.994	-7.825			20.253											28.316	8.03
-28.936	-7.8408			20.253											28.197	8.0452
-28.905	-7.8575			20.253											27.921	8.0616
-28.941	-7.8697			20.253											27.833	8.0779
-28.924	-7.885			20.253											27.625	8.0945
-28.897	-7.9007			20.253											27.417	8.11
-28.905	-7.9136			20.253											27.335	8.1251
-28.85	-7.9298			20.253											27.284	8.1376
-28.756	-7.945			20.253											27.266	8.1538
-28.677	-7.9609			20.253											27.298	8.1697
-28.647	-7.9776			20.253											27.31	8.1897
-28.609	-7.994			20.253											27.336	8.205
-28.488	-8.014			20.253											27.309	8.2207
-28.316	-8.03			20.253											27.232	8.2375
-28.197	-8.0452			20.253											27.175	8.2499
-27.921	-8.0616			20.253											27.079	8.265
-27.833	-8.0779			20.253											27.02	8.2807
-27.625	-8.0945			20.253											27.032	8.2973
-27.417	-8.11			20.253											27.08	8.3134
-27.335	-8.1251			20.253											27.127	8.325
-27.284	-8.1376			20.253											27.114	8.3406
-27.266	-8.1538			20.253											27.078	8.3574
-27.298	-8.1697			20.253											27.039	8.3736
-27.31	-8.1897			20.253											26.948	8.3898
-27.336	-8.205			20.253											26.884	8.4098
-27.309	-8.2207			20.253											26.808	8.425
-27.232	-8.2375			20.253											26.739	8.4408
-27.175	-8.2499			20.253											26.618	8.4577
-27.079	-8.265			20.253											26.48	8.474
-27.02	-8.2807			20.253											26.421	8.49
-27.032	-8.2973			20.253											26.238	8.5139
-27.08	-8.3134			20.253											26.144	8.53
-27.127	-8.325			20.253											26.055	8.545
-27.114	-8.3406			20.253											25.982	8.561
-27.078	-8.3574			20.253											25.944	8.5776
-27.039	-8.3736			20.253											25.902	8.5938
-26.948	-8.3898			20.253											25.732	8.61
-26.884	-8.4098			20.253											25.462	8.6254
-26.808	-8.425			20.253											25.322	8.6379
-26.739	-8.4408			20.253											25.219	8.654
-26.618	-8.4577			20.253											25.03	8.6742
-26.48	-8.474			20.253											24.901	8.69
-26.421	-8.49			20.253											24.774	8.7058
-26.238	-8.5139			20.253											24.635	8.722
-26.144	-8.53			20.253											24.511	8.7349
-26.055	-8.545			20.253											24.196	8.7506
-25.982	-8.561			20.253											23.35	8.7677
-25.944	-8.5776			20.253											22.59	8.7834
-25.902	-8.5938			20.253											22.055	8.7998
-25.732	-8.61			20.253											21.624	8.815
-25.462	-8.6254			20.253											21.245	8.8305
-25.322	-8.6379			20.253											20.898	8.8504
-25.219	-8.654			20.253											20.608	8.8665
-25.03	-8.6742			20.253											20.344	8.8823
-24.901	-8.69			20.253											20.184	8.895
-24.774	-8.7058			20.253											19.911	8.9102
-24.635	-8.722			20.253											19.66	8.9264
-24.511	-8.7349			20.253											19.374	8.9423
-24.196	-8.7506			20.253											19.117	8.9588
-23.35	-8.7677			20.253											18.992	8.9749
-22.59	-8.7834			20.253											18.954	8.99
-22.055	-8.7998			20.253											18.904	9.0056
-21.624	-8.815			20.253											18.845	9.0256
-21.245	-8.8305			20.253											18.76	9.0415
-20.898	-8.8504			20.253											18.679	9.0583
-20.608	-8.8665			20.253											18.66	9.0743
-20.344	-8.8823			20.253											18.714	9.09
-20.184	-8.895			20.253											18.732	9.1011
-19.911	-8.9102			20.253											18.794	9.1178
-19.66	-8.9264			20.253											18.895	9.1339
-19.374	-8.9423			20.253											19.014	9.1499
-19.117	-8.9588			20.253											19.179	9.1738
-18.992	-8.9749			20.253											19.271	9.1899
-18.954	-8.99			20.253											19.355	9.205
-18.904	-9.0056			20.253											19.439	9.2209
-18.845	-9.0256			20.253											19.499	9.2375
-18.76	-9.0415			20.253											19.509	9.2539
-18.679	-9.0583			20.253											19.475	9.27
-18.66	-9.0743			20.253											19.453	9.29
-18.714	-9.09			20.253											19.388	9.3052
-18.732	-9.1011			20.253											19.358	9.3178
-18.794	-9.1178			20.253											19.357	9.3339
-18.895	-9.1339			20.253											19.372	9.35
-19.014	-9.1499			20.253											19.338	9.3611
-19.179	-9.1738			20.253											19.295	9.3778
-19.271	-9.1899			20.253											19.187	9.3943
-19.355	-9.205			20.253											18.978	9.41
-19.439	-9.2209			20.253											18.752	9.4258
-19.499	-9.2375			20.253											18.574	9.4417
-19.509	-9.2539			20.253											18.405	9.4583
-19.475	-9.27			20.253											18.163	9.4748
-19.453	-9.29			20.253											17.959	9.49
-19.388	-9.3052			20.253											17.834	9.51
-19.358	-9.3178			20.253											17.803	9.5254
-19.357	-9.3339			20.253											17.774	9.5381
-19.372	-9.35			20.253											17.706	9.5543
-19.338	-9.3611			20.253											17.628	9.57
-19.295	-9.3778			20.253											17.639	9.5853
-19.187	-9.3943			20.253											17.64	9.6012
-18.978	-9.41			20.253											17.58	9.6178
-18.752	-9.4258			20.253											17.598	9.6345
-18.574	-9.4417			20.253											17.545	9.65
-18.405	-9.4583			20.253											17.45	9.6654
-18.163	-9.4748			20.253											17.396	9.6853
-17.959	-9.49			20.253											17.364	9.6978
-17.834	-9.51			20.253											17.366	9.71
-17.803	-9.5254			20.253											17.369	9.73
-17.774	-9.5381			20.253											17.314	9.7453
-17.706	-9.5543			20.253											17.275	9.7611
-17.628	-9.57			20.253											17.247	9.7777
-17.639	-9.5853			20.253											17.238	9.794
-17.64	-9.6012			20.253											17.268	9.81
-17.58	-9.6178			20.253											17.283	9.8251
-17.598	-9.6345			20.253											17.235	9.8413
-17.545	-9.65			20.253											17.167	9.858
-17.45	-9.6654			20.253											17.111	9.8701
-17.396	-9.6853			20.253											17.01	9.8854
-17.364	-9.6978			20.253											16.925	9.898
-17.366	-9.71			20.253											16.802	9.91
-17.369	-9.73			20.253											16.592	9.9257
-17.314	-9.7453			20.253											16.34	9.9417
-17.275	-9.7611			20.253											16.129	9.9583
-17.247	-9.7777			20.253											15.95	9.9744
-17.238	-9.794			20.253											15.688	9.9944
-17.268	-9.81			20.253											15.55	10.01
-17.283	-9.8251			20.253											15.46	10.0258
-17.235	-9.8413			20.253											15.335	10.0419
-17.167	-9.858			20.253											15.24	10.0586
-17.111	-9.8701			20.253											15.222	10.07
-17.01	-9.8854			20.253											15.188	10.086
-16.925	-9.898			20.253											15.112	10.0988
-16.802	-9.91			20.253											15.057	10.115
-16.592	-9.9257			20.253											15.056	10.126
-16.34	-9.9417			20.253											15.046	10.1419
-16.129	-9.9583			20.253											15.032	10.1586
-15.95	-9.9744			20.253											14.939	10.175
-15.688	-9.9944			20.253											14.815	10.1901
-15.55	-10.01			20.253											14.724	10.2021
-15.46	-10.0258			20.253											14.626	10.2187
-15.335	-10.0419			20.253											14.592	10.23
-15.24	-10.0586			20.253											14.526	10.2461
-15.222	-10.07			20.253											14.409	10.262
-15.188	-10.086			20.253											14.316	10.2788
-15.112	-10.0988			20.253											14.294	10.2949
-15.057	-10.115			20.253											14.358	10.3059
-15.056	-10.126			20.253											14.402	10.3218
-15.046	-10.1419			20.253											14.397	10.3348
-15.032	-10.1586			20.253											14.359	10.35
-14.939	-10.175			20.253											14.378	10.3659
-14.815	-10.1901			20.253											14.408	10.3818
-14.724	-10.2021			20.253											14.406	10.3985
-14.626	-10.2187			20.253											14.359	10.4149
-14.592	-10.23			20.253											14.315	10.426
-14.526	-10.2461			20.253											14.267	10.4386
-14.409	-10.262			20.253											14.27	10.4548
-14.316	-10.2788			20.253											14.329	10.47
-14.294	-10.2949			20.253											14.398	10.4857
-14.358	-10.3059			20.253											14.478	10.5016
-14.402	-10.3218			20.253											14.574	10.5182
-14.397	-10.3348			20.253											14.629	10.53
-14.359	-10.35			20.253											14.717	10.5415
-14.378	-10.3659			20.253											14.764	10.5584
-14.408	-10.3818			20.253											14.792	10.5746
-14.406	-10.3985			20.253											14.731	10.59
-14.359	-10.4149			20.253											14.543	10.6103
-14.315	-10.426			20.253											14.281	10.6222
-14.267	-10.4386			20.253											14.13	10.635
-14.27	-10.4548			20.253											13.906	10.6501
-14.329	-10.47			20.253											13.647	10.67
-14.398	-10.4857			20.253											13.495	10.686
-14.478	-10.5016			20.253											13.431	10.7017
-14.574	-10.5182			20.253											13.358	10.7183
-14.629	-10.53			20.253											13.282	10.7347
-14.717	-10.5415			20.253											13.217	10.75
-14.764	-10.5584			20.253											13.126	10.7655
-14.792	-10.5746			20.253											13.07	10.7814
-14.731	-10.59			20.253											13.023	10.8011
-14.543	-10.6103			20.253											12.997	10.8135
-14.281	-10.6222			20.253											13.086	10.825
-14.13	-10.635			20.253											13.121	10.845
-13.906	-10.6501			20.253											13.165	10.8615
-13.647	-10.67			20.253											13.118	10.8785
-13.495	-10.686			20.253											13.045	10.895
-13.431	-10.7017			20.253											12.932	10.91
-13.358	-10.7183			20.253											12.895	10.925
-13.282	-10.7347			20.253											12.818	10.9409
-13.217	-10.75			20.253											12.587	10.9579
-13.126	-10.7655			20.253											12.346	10.9748
-13.07	-10.7814			20.253											12.154	10.986
-13.023	-10.8011			20.253											12.001	11.0017
-12.997	-10.8135			20.253											11.874	11.0215
-13.086	-10.825			20.253											11.727	11.0346
-13.121	-10.845			20.253											11.636	11.0456
-13.165	-10.8615			20.253											11.485	11.0656
-13.118	-10.8785			20.253											11.422	11.0812
-13.045	-10.895			20.253											11.377	11.0979
-12.932	-10.91			20.253											11.297	11.1141
-12.895	-10.925			20.253											11.195	11.1299
-12.818	-10.9409			20.253											11.164	11.1456
-12.587	-10.9579			20.253											11.243	11.1612
-12.346	-10.9748			20.253											11.313	11.1776
-12.154	-10.986			20.253											11.367	11.1975
-12.001	-11.0017			20.253											11.37	11.2138
-11.874	-11.0215			20.253											11.356	11.2299
-11.727	-11.0346			20.253											11.331	11.2451
-11.636	-11.0456			20.253											11.421	11.2605
-11.485	-11.0656			20.253											11.594	11.2769
-11.422	-11.0812			20.253											11.785	11.2932
-11.377	-11.0979			20.253											11.8	11.31
-11.297	-11.1141			20.253											11.517	11.33
-11.195	-11.1299			20.253											11.375	11.342
-11.164	-11.1456			20.253											11.256	11.3547
-11.243	-11.1612			20.253											11.199	11.374
-11.313	-11.1776			20.253											11.195	11.3899
-11.367	-11.1975			20.253											11.201	11.405
-11.37	-11.2138			20.253											11.145	11.4209
-11.356	-11.2299			20.253											11.134	11.438
-11.331	-11.2451			20.253											11.13	11.4546
-11.421	-11.2605			20.253											11.195	11.47
-11.594	-11.2769			20.253											11.13	11.4856
-11.785	-11.2932			20.253											10.817	11.5054
-11.8	-11.31			20.253											10.615	11.5212
-11.517	-11.33			20.253											10.555	11.5376
-11.375	-11.342			20.253											10.45	11.55
-11.256	-11.3547			20.253											10.256	11.5651
-11.199	-11.374			20.253											10.054	11.5811
-11.195	-11.3899			20.253											9.875	11.5976
-11.201	-11.405			20.253											9.807	11.6138
-11.145	-11.4209			20.253											9.722	11.6298
-11.134	-11.438			20.253											9.641	11.645
-11.13	-11.4546			20.253											9.566	11.6607
-11.195	-11.47			20.253											9.468	11.6737
-11.13	-11.4856			20.253											9.348	11.6898
-10.817	-11.5054			20.253											9.298	11.705
-10.615	-11.5212			20.253											9.302	11.7251
-10.555	-11.5376			20.253											9.329	11.7405
-10.45	-11.55			20.253											9.413	11.757
-10.256	-11.5651			20.253											9.538	11.7734
-10.054	-11.5811			20.253											9.649	11.7896
-9.875	-11.5976			20.253											9.751	11.805
-9.807	-11.6138			20.253											9.827	11.8208
-9.722	-11.6298			20.253											9.921	11.8374
-9.641	-11.645			20.253											9.983	11.8575
-9.566	-11.6607			20.253											9.977	11.8699
-9.468	-11.6737			20.253											9.937	11.8807
-9.348	-11.6898			20.253											10.006	11.9004
-9.298	-11.705			20.253											10.112	11.917
-9.302	-11.7251			20.253											10.195	11.9334
-9.329	-11.7405			20.253											10.22	11.9496
-9.413	-11.757			20.253											10.202	11.965
-9.538	-11.7734			20.253											10.194	11.9805
-9.649	-11.7896			20.253											10.23	11.9972
-9.751	-11.805			20.253											10.249	12.0134
-9.827	-11.8208			20.253											10.291	12.0334
-9.921	-11.8374			20.253											10.307	12.0496
-9.983	-11.8575			20.253											10.378	12.065
-9.977	-11.8699			20.253											10.49	12.0804
-9.937	-11.8807			20.253											10.607	12.0971
-10.006	-11.9004			20.253											10.702	12.1133
-10.112	-11.917			20.253											10.824	12.1298
-10.195	-11.9334			20.253											10.863	12.145
-10.22	-11.9496			20.253											10.945	12.165
-10.202	-11.965			20.253											10.939	12.1773
-10.194	-11.9805			20.253											10.97	12.1896
-10.23	-11.9972			20.253											11.037	12.2096
-10.249	-12.0134			20.253											11.073	12.2251
-10.291	-12.0334			20.253											11.11	12.2407
-10.307	-12.0496			20.253											11.168	12.2607
-10.378	-12.065			20.253											11.206	12.2773
-10.49	-12.0804			20.253											11.202	12.2898
-10.607	-12.0971			20.253											11.226	12.305
-10.702	-12.1133			20.253											11.263	12.3172
-10.824	-12.1298			20.253											11.3	12.3335
-10.863	-12.145			20.253											11.334	12.3498
-10.945	-12.165			20.253											11.436	12.365
-10.939	-12.1773			20.253											11.593	12.385
-10.97	-12.1896			20.253											11.661	12.4007
-11.037	-12.2096			20.253											11.728	12.4175
-11.073	-12.2251			20.253											11.771	12.4338
-11.11	-12.2407			20.253											11.859	12.4499
-11.168	-12.2607			20.253											11.95	12.465
-11.206	-12.2773			20.253											12.004	12.4808
-11.202	-12.2898			20.253											12.099	12.4975
-11.226	-12.305			20.253											12.184	12.5174
-11.263	-12.3172			20.253											12.32	12.5336
-11.3	-12.3335			20.253											12.449	12.5497
-11.334	-12.3498			20.253											12.48	12.565
-11.436	-12.365			20.253											12.522	12.5808
-11.593	-12.385			20.253											12.62	12.5974
-11.661	-12.4007			20.253											12.746	12.6136
-11.728	-12.4175			20.253											12.84	12.6297
-11.771	-12.4338			20.253											12.959	12.6498
-11.859	-12.4499			20.253											13.018	12.665
-11.95	-12.465			20.253											13.088	12.6808
-12.004	-12.4808			20.253											13.2	12.7007
-12.099	-12.4975			20.253											13.4	12.7173
-12.184	-12.5174			20.253											13.737	12.7375
-12.32	-12.5336			20.253											13.966	12.7545
-12.449	-12.5497			20.253											14.179	12.77
-12.48	-12.565			20.253											14.491	12.7852
-12.522	-12.5808			20.253											14.831	12.8021
-12.62	-12.5974			20.253											15.024	12.815
-12.746	-12.6136			20.253											15.296	12.8303
-12.84	-12.6297			20.253											15.577	12.8464
-12.959	-12.6498			20.253											15.941	12.8706
-13.018	-12.665			20.253											16.195	12.8867
-13.088	-12.6808			20.253											16.43	12.9024
-13.2	-12.7007			20.253											16.705	12.919
-13.4	-12.7173			20.253											16.966	12.9351
-13.737	-12.7375			20.253											17.228	12.9502
-13.966	-12.7545			20.253											17.454	12.9664
-14.179	-12.77			20.253											17.628	12.979
-14.491	-12.7852			20.253											17.889	12.9951
-14.831	-12.8021			20.253											18.115	13.0103
-15.024	-12.815			20.253											18.263	13.0225
-15.296	-12.8303			20.253											18.47	13.0395
-15.577	-12.8464			20.253											18.593	13.055
-15.941	-12.8706			20.253											18.855	13.0704
-16.195	-12.8867			20.253											19.079	13.0906
-16.43	-12.9024			20.253											19.247	13.1066
-16.705	-12.919			20.253											19.388	13.122
-16.966	-12.9351			20.253											19.592	13.1427
-17.228	-12.9502			20.253											19.641	13.1598
-17.454	-12.9664			20.253											19.741	13.1797
-17.628	-12.979			20.253											19.933	13.1949
-17.889	-12.9951			20.253											20.118	13.21
-18.115	-13.0103			20.253											20.185	13.2262
-18.263	-13.0225			20.253											20.274	13.2423
-18.47	-13.0395			20.253											20.424	13.2588
-18.593	-13.055			20.253											20.626	13.275
-18.855	-13.0704			20.253											20.761	13.29
-19.079	-13.0906			20.253											20.871	13.3101
-19.247	-13.1066			20.253											21.074	13.3263
-19.388	-13.122														21.188	13.3428
-19.592	-13.1427														21.328	13.3594
-19.641	-13.1598														21.545	13.375
-19.741	-13.1797														21.67	13.3907
-19.933	-13.1949														21.829	13.4069
-20.118	-13.21														21.991	13.4228
-20.185	-13.2262														22.053	13.4388
-20.274	-13.2423														22.154	13.45
-20.424	-13.2588														22.302	13.4659
-20.626	-13.275														22.438	13.4818
-20.761	-13.29														22.539	13.5018
-20.871	-13.3101														22.569	13.5188
-21.074	-13.3263														22.609	13.535
-21.188	-13.3428														22.652	13.55
-21.328	-13.3594														22.744	13.566
-21.545	-13.375														22.766	13.582
-21.67	-13.3907														22.763	13.599
-21.829	-13.4069														22.519	13.6151
-21.991	-13.4228														22.375	13.635
-22.053	-13.4388														22.238	13.6506
-22.154	-13.45														22.082	13.6666
-22.302	-13.4659														22.032	13.6824
-22.438	-13.4818														21.913	13.6992
-22.539	-13.5018														21.864	13.715
-22.569	-13.5188														21.823	13.7308
-22.609	-13.535														21.595	13.7476
-22.652	-13.55														21.467	13.76
-22.744	-13.566														21.199	13.775
-22.766	-13.582														20.899	13.7911
-22.763	-13.599														20.692	13.8105
-22.519	-13.6151														20.647	13.8264
-22.375	-13.635														20.605	13.8422
-22.238	-13.6506														20.586	13.8589
-22.082	-13.6666														20.577	13.875
-22.032	-13.6824														20.573	13.8904
-21.913	-13.6992														20.53	13.9066
-21.864	-13.715														20.499	13.9227
-21.823	-13.7308														20.505	13.9426
-21.595	-13.7476														20.492	13.955
-21.467	-13.76														20.504	13.9663
-21.199	-13.775														10.695	13.952
-20.899	-13.7911														9.945	13.9945
-20.692	-13.8105														10.221	14.0169
-20.647	-13.8264														9.672	14.0323
-20.605	-13.8422														10.344	14.0517
-20.586	-13.8589														10.33	14.0674
-20.577	-13.875														10.879	14.0847
-20.573	-13.8904														11.261	14.1011
-20.53	-13.9066														11.39	14.1201
-20.499	-13.9227														11.93	14.1403
-20.505	-13.9426														12.248	14.1572
-20.492	-13.955														12.403	14.1695
-20.504	-13.9663														12.776	14.1849
-10.695	-13.952														12.896	14.2
-9.945	-13.9945														13.263	14.2185
-10.221	-14.0169														13.473	14.2318
-9.672	-14.0323														13.947	14.256
-10.344	-14.0517														14.325	14.2738
-10.33	-14.0674														14.616	14.2882
-10.879	-14.0847														14.956	14.305
-11.261	-14.1011														15.318	14.32
-11.39	-14.1201														15.678	14.34
-11.93	-14.1403														16.106	14.3574
-12.248	-14.1572														16.38	14.3727
-12.403	-14.1695														16.67	14.3898
-12.776	-14.1849														16.975	14.4048
-12.896	-14.2														17.202	14.4204
-13.263	-14.2185														17.537	14.4371
-13.473	-14.2318														17.797	14.4532
-13.947	-14.256														18.16	14.4694
-14.325	-14.2738														18.404	14.4801
-14.616	-14.2882														18.932	14.5049
-14.956	-14.305														19.176	14.517
-15.318	-14.32														19.471	14.5335
-15.678	-14.34														19.738	14.545
-16.106	-14.3574														20.031	14.5603
-16.38	-14.3727														20.333	14.5731
-16.67	-14.3898														20.597	14.585
-16.975	-14.4048														21.024	14.605
-17.202	-14.4204														21.338	14.6203
-17.537	-14.4371														21.69	14.6371
-17.797	-14.4532														22.053	14.6532
-18.16	-14.4694														22.26	14.665
-18.404	-14.4801														22.517	14.6805
-18.932	-14.5049														22.772	14.6973
-19.176	-14.517														23.074	14.7135
-19.471	-14.5335														23.343	14.7296
-19.738	-14.545														23.533	14.7451
-20.031	-14.5603														23.825	14.7604
-20.333	-14.5731														24.203	14.7804
-20.597	-14.585														24.468	14.7971
-21.024	-14.605														24.749	14.8135
-21.338	-14.6203														25.042	14.8297
-21.69	-14.6371														25.331	14.8451
-22.053	-14.6532														25.606	14.8605
-22.26	-14.665														25.831	14.8774
-22.517	-14.6805														26.072	14.8935
-22.772	-14.6973														26.428	14.9135
-23.074	-14.7135														26.643	14.9297
-23.343	-14.7296														26.876	14.945
-23.533	-14.7451														27.056	14.9605
-23.825	-14.7604														27.287	14.977
-24.203	-14.7804														27.449	14.9894
-24.468	-14.7971														27.646	15.0049
-24.749	-14.8135														27.795	15.0205
-25.042	-14.8297														27.949	15.0371
-25.331	-14.8451														28.119	15.0534
-25.606	-14.8605														28.284	15.0693
-25.831	-14.8774														28.588	15.0888
-26.072	-14.8935														28.787	15.1048
-26.428	-14.9135														28.984	15.1201
-26.643	-14.9297														29.219	15.1333
-26.876	-14.945														28.636	15.1489
-27.056	-14.9605														27.873	15.1639
-27.287	-14.977														27.148	15.1805
-27.449	-14.9894														26.924	15.1937
-27.646	-15.0049														26.78	15.2103
-27.795	-15.0205														26.815	15.2276
-27.949	-15.0371														26.905	15.2442
-28.119	-15.0534														27.16	15.2647
-28.284	-15.0693														27.322	15.28
-28.588	-15.0888														27.431	15.2965
-28.787	-15.1048														27.489	15.3124
-28.984	-15.1201														27.188	15.3266
-29.219	-15.1333														26.409	15.342
-28.636	-15.1489														25.601	15.357
-27.873	-15.1639														24.709	15.373
-27.148	-15.1805														23.779	15.3933
-26.924	-15.1937														22.927	15.4093
-26.78	-15.2103														22.003	15.425
-26.815	-15.2276														21.017	15.4403
-26.905	-15.2442														19.845	15.4551
-27.16	-15.2647														17.937	15.4699
-27.322	-15.28														16.597	15.488
-27.431	-15.2965														16.28	15.5015
-27.489	-15.3124														16.28	15.52
-27.188	-15.3266														16.462	15.5368
-26.409	-15.342														16.713	15.5535
-25.601	-15.357														17.044	15.5739
-24.709	-15.373														17.281	15.59
-23.779	-15.3933														17.542	15.605
-22.927	-15.4093														17.792	15.6211
-22.003	-15.425														18.052	15.6377
-21.017	-15.4403														18.313	15.6539
-19.845	-15.4551														18.581	15.6698
-17.937	-15.4699														18.872	15.6851
-16.597	-15.488														19.244	15.7051
-16.28	-15.5015														19.544	15.7208
-16.28	-15.52														19.839	15.7376
-16.462	-15.5368														20.119	15.7536
-16.713	-15.5535														20.398	15.7698
-17.044	-15.5739														20.456	15.7824
-17.281	-15.59														20.229	15.7823
-17.542	-15.605														19.753	15.7753
-17.792	-15.6211														18.296	15.7799
-18.052	-15.6377														17.613	15.7799
-18.313	-15.6539														17.229	15.7837
-18.581	-15.6698
-18.872	-15.6851
-19.244	-15.7051
-19.544	-15.7208
-19.839	-15.7376
-20.119	-15.7536
-20.398	-15.7698
-20.456	-15.7824
-20.229	-15.7823
-19.753	-15.7753
-18.296	-15.7799
-17.613	-15.7799
-17.229	-15.7837

## Sheet: MSA135L80
WORKSHOP 3 EXPORTED DATA: [C:\Users\Maleki\2012-5-14\MSA135L80.W01 - 1]					LOAD(KN)	DISPLACEMENT(mm)									LOAD(KN)	DISPLACEMENT(mm)
*************************************************************************************************				24.493	0	0									0.06	0.005
Source of data: ToolKit				24.493	2.61242	0.0128									0.151	0.0038
WS3 File Version: 1.04				24.493	4.66595	0.0283									0.061	0
Number of bytes in subfile: 4230				24.493	6.92256	0.0487									-0.05	0
Total number of data points: 489				24.493	8.60811	0.0648									-0.07	0
Test date: 14/05/2012				24.493	10.3556	0.08									-0.027	0.0046
Test time: 23:31:26				24.493	12.1231	0.0955									0.074	0.0001
Player Step: 1				24.493	13.9824	0.1111									-0.101	0.0007
Step Capture No: 1				24.493	15.9512	0.1267									0.117	0.0035
Actuator: 1				24.493	17.9915	0.1422									-0.012	0
*************************************************************************************************				24.493	20.1275	0.1583									-0.054	0
Actuator: 1 Channel:0	Actuator: 1 Channel:1			24.493	22.363	0.1742									0.035	0.005
Load Current (kN)	Stroke Current (mm)			24.493	24.0912	0.185									-0.127	0.0018
-0.06	-0.005			24.493	26.4596	0.2									0.031	0
-0.151	-0.0038			24.493	29.0742	0.215									0.046	0.0007
-0.061	0	fc	24.493	24.493	31.2224	0.2251									-0.096	0
0.05	0			24.493	33.4795	0.2373									0.019	0.005
0.07	0			24.493	36.5828	0.2532									0.32	0.005
0.027	-0.0046			24.493	39.7652	0.2691									4.721	0.0178
-0.074	-0.0001			24.493	43.8202	0.289									8.432	0.0333
0.101	-0.0007			24.493	47.0834	0.305									12.51	0.0537
-0.117	-0.0035			24.493	50.3189	0.3208									15.556	0.0698
0.012	0			24.493	53.5511	0.3377									18.714	0.085
0.054	0			24.493	56.7755	0.354									21.908	0.1005
-0.035	-0.005			24.493	60.7863	0.3741									25.268	0.1161
0.127	-0.0018			24.493	64.0141	0.39									28.826	0.1317
-0.031	0			24.493	66.3642	0.4011									32.513	0.1472
-0.046	-0.0007			24.493	68.6911	0.415									36.373	0.1633
0.096	0			24.493	71.4612	0.4277									40.413	0.1792
-0.019	-0.005			24.493	75.3425	0.4463			MAX LOAD(KN)	@ DISPLACEMENT(mm)					43.536	0.19
-0.32	-0.005			24.493	78.453	0.4622			172.852	1.027					47.816	0.205
-4.721	-0.0178			24.493	81.2164	0.4755			delta ultimate	2.5					52.541	0.22
-8.432	-0.0333			24.493	84.8526	0.4929									56.423	0.2301
-12.51	-0.0537			24.493	87.3848	0.505									60.502	0.2423
-15.556	-0.0698			24.493	91.4592	0.524									66.11	0.2582
-18.714	-0.085			24.493	94.6958	0.5394									71.861	0.2741
-21.908	-0.1005			24.493	97.9562	0.5545									79.189	0.294
-25.268	-0.1161			24.493	101.219	0.5699									85.086	0.31
-28.826	-0.1317			24.493	106.381	0.594									90.933	0.3258
-32.513	-0.1472			24.493	110.381	0.6117									96.774	0.3427
-36.373	-0.1633			24.493	115.099	0.634									102.601	0.359
-40.413	-0.1792			24.493	118.591	0.65									109.849	0.3791
-43.536	-0.19			24.493	121.891	0.6664									115.682	0.395
-47.816	-0.205			24.493	124.312	0.6791									119.929	0.4061
-52.541	-0.22			24.493	128.303	0.6992									124.134	0.42
-56.423	-0.2301			24.493	131.317	0.715									129.14	0.4327
-60.502	-0.2423			24.493	135.107	0.735									136.154	0.4513
-66.11	-0.2582			24.493	137.374	0.7474									141.775	0.4672
-71.861	-0.2741			24.493	139.497	0.76									146.769	0.4805
-79.189	-0.294			24.493	142.18	0.7809									153.34	0.4979
-85.086	-0.31			24.493	144.087	0.7978									157.916	0.51
-90.933	-0.3258			24.493	146.969	0.8172									165.279	0.529
-96.774	-0.3427			24.493	149.261	0.8334									171.128	0.5444
-102.601	-0.359			24.493	151.05	0.845									177.02	0.5595
-109.849	-0.3791			24.493	152.934	0.8567									182.917	0.5749
-115.682	-0.395			24.493	155.786	0.8774									192.244	0.599
-119.929	-0.4061			24.493	157.75	0.8939									199.473	0.6167
-124.134	-0.42			24.493	159.887	0.9099									207.999	0.639
-129.14	-0.4327			24.493	162.029	0.925									214.31	0.655
-136.154	-0.4513			24.493	163.653	0.9373									220.273	0.6714
-141.775	-0.4672			24.493	165.857	0.9534									224.649	0.6841
-146.769	-0.4805			24.493	167.421	0.965									231.861	0.7042
-153.34	-0.4979			24.493	169.208	0.9813									237.308	0.72
-157.916	-0.51			24.493	170.607	0.9939									244.157	0.74
-165.279	-0.529			24.493	171.982	1.0101									248.254	0.7524
-171.128	-0.5444			24.493	172.852	1.027									252.09	0.765
-177.02	-0.5595			24.493	172.604	1.0452									256.938	0.7859
-182.917	-0.5749			24.493	171.22	1.0631									260.384	0.8028
-192.244	-0.599			24.493	169.302	1.0841									265.593	0.8222
-199.473	-0.6167			24.493	167.665	1.0968									269.734	0.8384
-207.999	-0.639			24.493	164.872	1.114									272.968	0.85
-214.31	-0.655			24.493	154.663	1.158									276.373	0.8617
-220.273	-0.6714			24.493	152.564	1.1713									281.527	0.8824
-224.649	-0.6841			24.493	150.094	1.19									285.076	0.8989
-231.861	-0.7042			24.493	132.353	1.3491									288.937	0.9149
-237.308	-0.72			24.493	86.1939	1.3575									292.808	0.93
-244.157	-0.74			24.493	65.4395	1.3079									295.742	0.9423
-248.254	-0.7524			24.493	57.1906	1.2962									299.725	0.9584
-252.09	-0.765			24.493	54.5101	1.2941									302.552	0.97
-256.938	-0.7859			24.493	55.992	1.2949									305.781	0.9863
-260.384	-0.8028			24.493	59.1146	1.3022									308.31	0.9989
-265.593	-0.8222			24.493	64.9979	1.3247									310.795	1.0151
-269.734	-0.8384			24.493	69.3396	1.335									312.366	1.032
-272.968	-0.85			24.493	73.4489	1.3542									311.919	1.0502
-276.373	-0.8617			24.493	78.3661	1.3715									309.418	1.0681
-281.527	-0.8824			24.493	79.9874	1.385									305.951	1.0891
-285.076	-0.8989			24.493	83.177	1.399									302.994	1.1018
-288.937	-0.9149			24.493	85.0828	1.415									297.946	1.119
-292.808	-0.93			24.493	85.9538	1.4383									279.496	1.163
-295.742	-0.9423			24.493	85.0839	1.4598									275.703	1.1763
-299.725	-0.9584			24.493	81.6459	1.4972									271.24	1.195
-302.552	-0.97			24.493	76.2627	1.5224									239.18	1.3541
-305.781	-0.9863			24.493	69.3203	1.54									155.764	1.3625
-308.31	-0.9989			24.493	65.7151	1.5546									118.258	1.3129
-310.795	-1.0151			24.493	63.6594	1.56									103.351	1.3012
-312.366	-1.032			24.493	63.7872	1.5698									98.507	1.2991
-311.919	-1.0502			24.493	63.5736	1.58									101.185	1.2999
-309.418	-1.0681			24.493	62.2112	1.603									106.828	1.3072
-305.951	-1.0891			24.493	58.6365	1.6212									117.46	1.3297
-302.994	-1.1018			24.493	55.5415	1.6396									125.306	1.34
-297.946	-1.119			24.493	53.7569	1.6485									132.732	1.3592
-279.496	-1.163			24.493	52.4211	1.6601									141.618	1.3765
-275.703	-1.1763			24.493	51.5811	1.675									144.548	1.39
-271.24	-1.195			24.493	51.1135	1.6943									150.312	1.404
-239.18	-1.3541			24.493	50.7826	1.7099									153.756	1.42
-155.764	-1.3625			24.493	50.455	1.7217									155.33	1.4433
-118.258	-1.3129			24.493	49.7334	1.7423									153.758	1.4648
-103.351	-1.3012			24.493	48.9914	1.7595									147.545	1.5022
-98.507	-1.2991			24.493	48.158	1.775									137.817	1.5274
-101.185	-1.2999			24.493	47.2522	1.7914									125.271	1.545
-106.828	-1.3072			24.493	46.4315	1.8074									118.756	1.5596
-117.46	-1.3297			24.493	45.6756	1.8231									115.041	1.565
-125.306	-1.34			24.493	44.9441	1.8398									115.272	1.5748
-132.732	-1.3592			24.493	44.4367	1.8507									114.886	1.585
-141.618	-1.3765			24.493	43.8075	1.8665									112.424	1.608
-144.548	-1.39			24.493	43.3786	1.879									105.964	1.6262
-150.312	-1.404			24.493	42.9752	1.89									100.371	1.6446
-153.756	-1.42			24.493	42.4257	1.9061									97.146	1.6535
-155.33	-1.4433			24.493	41.8785	1.9193									94.732	1.6651
-153.758	-1.4648			24.493	40.8736	1.9356									93.214	1.68
-147.545	-1.5022			24.493	39.9234	1.9509									92.369	1.6993
-137.817	-1.5274			24.493	39.1974	1.9659									91.771	1.7149
-125.271	-1.545			24.493	38.633	1.9809									91.179	1.7267
-118.756	-1.5596			24.493	38.2982	1.9932									89.875	1.7473
-115.041	-1.565			24.493	37.9679	2.005									88.534	1.7645
-115.272	-1.5748			24.493	37.4278	2.0204									87.028	1.78
-114.886	-1.585			24.493	36.7233	2.0376									85.391	1.7964
-112.424	-1.608			24.493	36.2386	2.0497									83.908	1.8124
-105.964	-1.6262			24.493	35.8169	2.0647									82.542	1.8281
-100.371	-1.6446			24.493	35.6526	2.0752									81.22	1.8448
-97.146	-1.6535			24.493	35.5292	2.0911									80.303	1.8557
-94.732	-1.6651			24.493	35.3709	2.1035									79.166	1.8715
-93.214	-1.68			24.493	35.1335	2.1157									78.391	1.884
-92.369	-1.6993			24.493	34.6239	2.1361									77.662	1.895
-91.771	-1.7149			24.493	34.3361	2.1485									76.669	1.9111
-91.179	-1.7267			24.493	34.0014	2.16									75.68	1.9243
-89.875	-1.7473			24.493	33.6096	2.1762									73.864	1.9406
-88.534	-1.7645			24.493	33.3274	2.1885									72.147	1.9559
-87.028	-1.78			24.493	32.919	2.2046									70.835	1.9709
-85.391	-1.7964			24.493	32.6224	2.2162									69.815	1.9859
-83.908	-1.8124			24.493	32.2251	2.2324									69.21	1.9982
-82.542	-1.8281			24.493	31.8698	2.245									68.613	2.01
-81.22	-1.8448			24.493	31.4559	2.2569									67.637	2.0254
-80.303	-1.8557			24.493	30.9385	2.2731									66.364	2.0426
-79.166	-1.8715			24.493	30.4471	2.2892									65.488	2.0547
-78.391	-1.884			24.493	29.8428	2.305									64.726	2.0697
-77.662	-1.895			24.493	29.124	2.3215									64.429	2.0802
-76.669	-1.9111			24.493	28.1623	2.3392									64.206	2.0961
-75.68	-1.9243			24.493	26.2421	2.3616									63.92	2.1085
-73.864	-1.9406			24.493	24.7347	2.375									63.491	2.1207
-72.147	-1.9559			24.493	22.5174	2.395									62.57	2.1411
-70.835	-1.9709			24.493	21.6066	2.405									62.05	2.1535
-69.815	-1.9859			24.493	20.9011	2.4196									61.445	2.165
-69.21	-1.9982			24.493	20.5801	2.43									60.737	2.1812
-68.613	-2.01			24.493	20.05	2.45									60.227	2.1935
-67.637	-2.0254			24.493	19.5132	2.4664									59.489	2.2096
-66.364	-2.0426			24.493	18.562	2.4875									58.953	2.2212
-65.488	-2.0547			24.493	17.8565	2.5									58.235	2.2374
-64.726	-2.0697			24.493											57.593	2.25
-64.429	-2.0802			24.493											56.845	2.2619
-64.206	-2.0961			24.493											55.91	2.2781
-63.92	-2.1085			24.493											55.022	2.2942
-63.491	-2.1207			24.493											53.93	2.31
-62.57	-2.1411			24.493											52.631	2.3265
-62.05	-2.1535			24.493											50.893	2.3442
-61.445	-2.165			24.493											47.423	2.3666
-60.737	-2.1812			24.493											44.699	2.38
-60.227	-2.1935			24.493											40.692	2.4
-59.489	-2.2096			24.493											39.046	2.41
-58.953	-2.2212			24.493											37.771	2.4246
-58.235	-2.2374			24.493											37.191	2.435
-57.593	-2.25			24.493											36.233	2.455
-56.845	-2.2619			24.493											35.263	2.4714
-55.91	-2.2781			24.493											33.544	2.4925
-55.022	-2.2942			24.493											32.269	2.505
-53.93	-2.31			24.493											30.645	2.5207
-52.631	-2.3265			24.493											29.485	2.533
-50.893	-2.3442			24.493											27.822	2.5495
-47.423	-2.3666			24.493											26.373	2.562
-44.699	-2.38			24.493											24.874	2.5747
-40.692	-2.4			24.493											23.299	2.5896
-39.046	-2.41			24.493											22.5	2.6
-37.771	-2.4246			24.493											21.688	2.6155
-37.191	-2.435			24.493											20.921	2.6282
-36.233	-2.455			24.493											19.737	2.645
-35.263	-2.4714			24.493											18.777	2.6567
-33.544	-2.4925			24.493											17.514	2.6729
-32.269	-2.505			24.493											16.536	2.685
-30.645	-2.5207			24.493											15.065	2.7049
-29.485	-2.533			24.493											14.494	2.7153
-27.822	-2.5495			24.493											13.925	2.731
-26.373	-2.562			24.493											13.503	2.7436
-24.874	-2.5747			24.493											12.729	2.76
-23.299	-2.5896			24.493											12.093	2.7718
-22.5	-2.6			24.493											11.358	2.7876
-21.688	-2.6155			24.493											10.851	2.8036
-20.921	-2.6282			24.493											10.539	2.815
-19.737	-2.645			24.493											10.15	2.8272
-18.777	-2.6567			24.493											9.301	2.8479
-17.514	-2.6729			24.493											8.648	2.8646
-16.536	-2.685			24.493											8.195	2.88
-15.065	-2.7049			24.493											7.723	2.8959
-14.494	-2.7153			24.493											7.079	2.9127
-13.925	-2.731			24.493											6.404	2.9288
-13.503	-2.7436			24.493											5.687	2.945
-12.729	-2.76			24.493											5.2	2.9643
-12.093	-2.7718														4.878	2.98
-11.358	-2.7876														4.545	2.9915
-10.851	-2.8036														4.199	3.004
-10.539	-2.815														3.651	3.0237
-10.15	-2.8272														3.191	3.0399
-9.301	-2.8479														2.698	3.055
-8.648	-2.8646														2.403	3.0703
-8.195	-2.88														2.148	3.0862
-7.723	-2.8959														1.884	3.1026
-7.079	-2.9127														1.66	3.1188
-6.404	-2.9288														1.476	3.1347
-5.687	-2.945														1.31	3.1457
-5.2	-2.9643														1.086	3.1624
-4.878	-2.98														0.826	3.175
-4.545	-2.9915														0.555	3.19
-4.199	-3.004														0.385	3.2026
-3.651	-3.0237														0.128	3.2191
-3.191	-3.0399														-0.073	3.2308
-2.698	-3.055														-0.396	3.2473
-2.403	-3.0703														-0.637	3.26
-2.148	-3.0862														-0.851	3.275
-1.884	-3.1026														-0.943	3.2868
-1.66	-3.1188														-1.049	3.3034
-1.476	-3.1347														-1.133	3.315
-1.31	-3.1457														-1.426	3.3351
-1.086	-3.1624														-1.645	3.3472
-0.826	-3.175														-1.795	3.3635
-0.555	-3.19														-1.9	3.375
-0.385	-3.2026														-2.076	3.3909
-0.128	-3.2191														-2.175	3.4035
0.073	-3.2308														-2.254	3.4195
0.396	-3.2473														-2.291	3.4305
0.637	-3.26														-2.372	3.4505
0.851	-3.275														-2.449	3.4665
0.943	-3.2868														-2.672	3.4867
1.049	-3.3034														-2.74	3.4994
1.133	-3.315														-2.809	3.515
1.426	-3.3351														-2.885	3.5264
1.645	-3.3472														-2.952	3.5392
1.795	-3.3635														-3.123	3.555
1.9	-3.375														-3.203	3.5663
2.076	-3.3909														-3.274	3.5829
2.175	-3.4035														-3.327	3.595
2.254	-3.4195														-3.437	3.6103
2.291	-3.4305														-3.526	3.6229
2.372	-3.4505														-3.706	3.635
2.449	-3.4665														-3.907	3.6504
2.672	-3.4867														-4.049	3.6663
2.74	-3.4994														-4.173	3.6828
2.809	-3.515														-4.279	3.6988
2.885	-3.5264														-4.369	3.7149
2.952	-3.5392														-4.464	3.7348
3.123	-3.555														-4.52	3.7457
3.203	-3.5663														-4.568	3.7624
3.274	-3.5829														-4.7	3.7787
3.327	-3.595														-4.869	3.795
3.437	-3.6103														-5.022	3.81
3.526	-3.6229														-5.252	3.83
3.706	-3.635														-5.393	3.8457
3.907	-3.6504														-5.485	3.8622
4.049	-3.6663														-5.503	3.8782
4.173	-3.6828														-5.535	3.8943
4.279	-3.6988														-5.569	3.91
4.369	-3.7149														-5.612	3.93
4.464	-3.7348														-5.711	3.9453
4.52	-3.7457														-5.805	3.9619
4.568	-3.7624														-5.886	3.9779
4.7	-3.7787														-5.954	3.994
4.869	-3.795														-6.054	4.01
5.022	-3.81														-6.125	4.025
5.252	-3.83														-6.188	4.0416
5.393	-3.8457														-6.255	4.054
5.485	-3.8622														-6.313	4.0698
5.503	-3.8782														-6.423	4.085
5.535	-3.8943														-6.522	4.105
5.569	-3.91														-6.604	4.1213
5.612	-3.93														-6.686	4.1375
5.711	-3.9453														-6.792	4.1537
5.805	-3.9619														-6.944	4.1698
5.886	-3.9779														-7.035	4.185
5.954	-3.994														-7.024	4.2009
6.054	-4.01														-7.01	4.2172
6.125	-4.025														-6.999	4.2333
6.188	-4.0416														-6.962	4.2493
6.255	-4.054														-6.964	4.261
6.313	-4.0698														-7.044	4.2776
6.423	-4.085														-7.152	4.2937
6.522	-4.105														-7.237	4.3134
6.604	-4.1213														-7.187	4.3291
6.686	-4.1375														-7.031	4.345
6.792	-4.1537														-7.012	4.361
6.944	-4.1698														-7.192	4.3774
7.035	-4.185														-7.285	4.3934
7.024	-4.2009														-7.328	4.4092
7.01	-4.2172														-7.432	4.425
6.999	-4.2333														-7.482	4.445
6.962	-4.2493														-7.54	4.4609
6.964	-4.261														-7.651	4.4771
7.044	-4.2776														-7.799	4.4933
7.152	-4.2937														-7.843	4.5091
7.237	-4.3134														-7.93	4.525
7.187	-4.3291														-8.085	4.5491
7.031	-4.345														-8.071	4.565
7.012	-4.361														-8.139	4.5807
7.192	-4.3774														-8.091	4.5965
7.285	-4.3934														-7.952	4.6127
7.328	-4.4092														-7.968	4.6292
7.432	-4.425														-7.97	4.6492
7.482	-4.445														-7.921	4.665
7.54	-4.4609														-7.882	4.6807
7.651	-4.4771														-7.858	4.6968
7.799	-4.4933														-7.849	4.713
7.843	-4.5091														-7.918	4.7293
7.93	-4.525														-7.928	4.745
8.085	-4.5491														-7.82	4.7689
8.071	-4.565														-7.791	4.7805
8.139	-4.5807														-7.762	4.7967
8.091	-4.5965														-7.742	4.8129
7.952	-4.6127														-7.763	4.829
7.968	-4.6292														-7.835	4.845
7.97	-4.6492														-7.829	4.8605
7.921	-4.665														-7.745	4.8765
7.882	-4.6807														-7.64	4.8927
7.858	-4.6968														-7.595	4.9128
7.849	-4.713														-7.564	4.9287
7.918	-4.7293														-7.613	4.945
7.928	-4.745														-7.621	4.9604
7.82	-4.7689														-7.642	4.9766
7.791	-4.7805														-7.688	4.9929
7.762	-4.7967														-7.792	5.005
7.742	-4.8129														-7.872	5.0205
7.763	-4.829														-7.936	5.0367
7.835	-4.845														-8.023	5.053
7.829	-4.8605														-8.206	5.0728
7.745	-4.8765														-8.316	5.085
7.64	-4.8927														-8.397	5.105
7.595	-4.9128														-8.477	5.1205
7.564	-4.9287														-8.561	5.1366
7.613	-4.945														-8.609	5.149
7.621	-4.9604														-8.708	5.1607
7.642	-4.9766														-8.864	5.1772
7.688	-4.9929														-8.953	5.193
7.792	-5.005														-9.028	5.205
7.872	-5.0205														-9.063	5.2168
7.936	-5.0367														-9.108	5.2369
8.023	-5.053														-9.164	5.2492
8.206	-5.0728														-9.221	5.2608
8.316	-5.085														-9.276	5.2807
8.397	-5.105														-9.298	5.2968
8.477	-5.1205														-9.308	5.3129
8.561	-5.1366														-9.347	5.3289
8.609	-5.149														-9.373	5.345
8.708	-5.1607														-9.388	5.3603
8.864	-5.1772														-9.346	5.3727
8.953	-5.193														-9.358	5.3887
9.028	-5.205														-9.417	5.405
9.063	-5.2168														-9.415	5.4202
9.108	-5.2369														-9.313	5.4364
9.164	-5.2492														-9.312	5.4566
9.221	-5.2608														-9.373	5.473
9.276	-5.2807														-9.409	5.485
9.298	-5.2968														-9.443	5.4969
9.308	-5.3129														-9.465	5.509
9.347	-5.3289														-9.47	5.525
9.373	-5.345														-9.459	5.5406
9.388	-5.3603														-9.464	5.5568
9.346	-5.3727														-9.454	5.569
9.358	-5.3887														-9.435	5.5805
9.417	-5.405														-9.329	5.5965
9.415	-5.4202														-9.243	5.6127
9.313	-5.4364														-9.268	5.633
9.312	-5.4566														-9.168	5.6487
9.373	-5.473														-8.986	5.665
9.409	-5.485														-8.994	5.6805
9.443	-5.4969														-9.002	5.6929
9.465	-5.509														-8.986	5.705
9.47	-5.525														-9.025	5.7204
9.459	-5.5406														-9.058	5.7365
9.464	-5.5568														-8.983	5.7485
9.454	-5.569														-8.817	5.7649
9.435	-5.5805														-8.749	5.7762
9.329	-5.5965														-8.688	5.7885
9.243	-5.6127														-8.609	5.805
9.268	-5.633														-8.478	5.8249
9.168	-5.6487														-8.434	5.8401
8.986	-5.665														-8.388	5.8562
8.994	-5.6805														-8.298	5.8722
9.002	-5.6929														-8.191	5.8922
8.986	-5.705														-8.216	5.905
9.025	-5.7204														-8.174	5.92
9.058	-5.7365														-8.101	5.9321
8.983	-5.7485														-8.148	5.9483
8.817	-5.7649														-8.152	5.96
8.749	-5.7762														-8.059	5.9758
8.688	-5.7885														-7.932	5.988
8.609	-5.805														-7.8	6
8.478	-5.8249														-7.666	6.016
8.434	-5.8401														-7.523	6.036
8.388	-5.8562														-7.385	6.0562
8.298	-5.8722														-7.291	6.0725
8.191	-5.8922														-7.272	6.085
8.216	-5.905														-7.267	6.0965
8.174	-5.92														-7.262	6.1126
8.101	-5.9321														-7.249	6.125
8.148	-5.9483														-7.347	6.145
8.152	-5.96														-7.321	6.16
8.059	-5.9758														-7.275	6.1726
7.932	-5.988														-7.305	6.185
7.8	-6														-7.332	6.205
7.666	-6.016														-7.243	6.2201
7.523	-6.036														-7.188	6.2327
7.385	-6.0562														-7.183	6.2488
7.291	-6.0725														-7.311	6.2608
7.272	-6.085														-7.452	6.2732
7.267	-6.0965														-7.617	6.2892
7.262	-6.1126														-7.761	6.3006
7.249	-6.125														-7.834	6.3167
7.347	-6.145														-7.952	6.3292
7.321	-6.16														-8.237	6.345
7.275	-6.1726														-8.429	6.3572
7.305	-6.185														-8.585	6.3693
7.332	-6.205														-8.782	6.385
7.243	-6.2201														-8.897	6.3969
7.188	-6.2327														-8.99	6.413
7.183	-6.2488														-9.048	6.4288
7.311	-6.2608														-9.046	6.4402
7.452	-6.2732														-9.133	6.4566
7.617	-6.2892														-9.304	6.4729
7.761	-6.3006														-9.443	6.485
7.834	-6.3167														-9.617	6.5003
7.952	-6.3292														-9.681	6.5126
8.237	-6.345														-9.714	6.5284
8.429	-6.3572														-9.776	6.5401
8.585	-6.3693														-9.881	6.5563
8.782	-6.385														-9.965	6.5685
8.897	-6.3969														-10.094	6.5803
8.99	-6.413														-10.209	6.5966
9.048	-6.4288														-10.371	6.6091
9.046	-6.4402														-10.537	6.625
9.133	-6.4566														-10.601	6.6406
9.304	-6.4729														-10.759	6.6608
9.443	-6.485														-10.88	6.677
9.617	-6.5003														-11.045	6.6933
9.681	-6.5126														-11.197	6.705
9.714	-6.5284														-11.376	6.7207
9.776	-6.5401														-11.51	6.7367
9.881	-6.5563														-11.606	6.7489
9.965	-6.5685														-11.701	6.7604
10.094	-6.5803														-11.846	6.773
10.209	-6.5966														-12.074	6.7889
10.371	-6.6091														-12.134	6.8001
10.537	-6.625														-12.092	6.8162
10.601	-6.6406														-12.1	6.8285
10.759	-6.6608														-12.15	6.845
10.88	-6.677														-12.221	6.8565
11.045	-6.6933														-12.311	6.8687
11.197	-6.705														-12.381	6.885
11.376	-6.7207														-12.397	6.8961
11.51	-6.7367														-12.421	6.9124
11.606	-6.7489														-12.517	6.925
11.701	-6.7604														-12.611	6.94
11.846	-6.773														-12.6	6.9523
12.074	-6.7889														-12.665	6.9683
12.134	-6.8001														-12.699	6.98
12.092	-6.8162														-12.737	6.9923
12.1	-6.8285														-12.701	7.008
12.15	-6.845														-12.645	7.02
12.221	-6.8565														-12.605	7.0357
12.311	-6.8687														-12.583	7.048
12.381	-6.885														-12.588	7.0646
12.397	-6.8961														-12.586	7.0758
12.421	-6.9124														-12.511	7.0879
12.517	-6.925														-12.395	7.1044
12.611	-6.94														-12.265	7.1156
12.6	-6.9523														-12.071	7.1318
12.665	-6.9683														-11.946	7.1445
12.699	-6.98														-11.795	7.16
12.737	-6.9923														-11.789	7.1702
12.701	-7.008														-12.52	7.175
12.645	-7.02														-12.872	7.1777
12.605	-7.0357														-13.496	7.175
12.583	-7.048														-13.66	7.175
12.588	-7.0646														-13.778	7.175
12.586	-7.0758
12.511	-7.0879
12.395	-7.1044
12.265	-7.1156
12.071	-7.1318
11.946	-7.1445
11.795	-7.16
11.789	-7.1702
12.52	-7.175
12.872	-7.1777
13.496	-7.175
13.66	-7.175
13.778	-7.175

## Sheet: MA135L100
WORKSHOP 3 EXPORTED DATA: [C:\Users\Maleki\2012-4-14\MA135L100.W01 - 1]					DISPLACEMENT(mm)	LOAD(KN)								DISPLACEMENT(mm)	LOAD(KN)
*************************************************************************************************				31.24	0	0.237								0	0.021
Source of data: ToolKit				31.24	0.0156	0.866278								0.0037	0.062
WS3 File Version: 1.04				31.24	0.0314	1.45719								0	-0.001
Number of bytes in subfile: 2014				31.24	0.0479	2.0236								0	0.046
Total number of data points: 212				31.24	0.0629	2.65371								0	-0.02
Test date: 14/05/2012				31.24	0.0737	3.17162								0	0.012
Test time: 17:24:17				31.24	0.0895	3.86738								0	0.037
Player Step: 1				31.24	0.1095	4.67976								0.0037	0.024
Step Capture No: 1				31.24	0.1263	5.29762								0	-0.01
Actuator: 1				31.24	0.1428	5.88805								0	0.028
*************************************************************************************************				31.24	0.1626	6.21241								0	0.048
Actuator: 1 Channel:0	Actuator: 1 Channel:1			31.24	0.1757	6.59459								0.0033	0.059
Load Current (kN)	Stroke Current (mm)			31.24	0.1919	7.05566								0	-0.031
-0.021	0	fc	31.24	31.24	0.2079	7.35308								0	-0.013
-0.062	-0.0037			31.24	0.224	7.76515								0	0.007
0.001	0			31.24	0.2368	8.10078								0	0.039
-0.046	0			31.24	0.2508	8.64955								0	0.054
0.02	0			31.24	0.2679	9.03761								0	-0.037
-0.012	0			31.24	0.2874	9.73828								0	-0.04
-0.037	0			31.24	0.3031	10.1783								0	-0.023
-0.024	-0.0037			31.24	0.3229	10.9123								0	-0.002
0.01	0			31.24	0.339	11.4169								0	0.021
-0.028	0			31.24	0.3504	11.8697								0	0.032
-0.048	0			31.24	0.3676	12.4527								0.0035	0.061
-0.059	-0.0033			31.24	0.3783	12.8844								0	-0.042
0.031	0			31.24	0.3941	13.5346								0	-0.033
0.013	0			31.24	0.4102	14.1466								0.0071	0.474
-0.007	0			31.24	0.4266	14.8223			MAX LOAD(KN)	@ DISPLACEMENT(mm)				0.0227	1.768
-0.039	0			31.24	0.4426	15.6209			197.093	1.7542				0.0385	2.974
-0.054	0			31.24	0.4622	16.5862			delta ultimate	2.7285				0.055	4.13
0.037	0			31.24	0.4732	17.207								0.07	5.416
0.04	0			31.24	0.4857	17.8479								0.0808	6.473
0.023	0			31.24	0.5061	18.9008								0.0966	7.893
0.002	0			31.24	0.5214	19.8107								0.1166	9.551
-0.021	0			31.24	0.5368	20.8372								0.1334	10.812
-0.032	0			31.24	0.5522	22.0264								0.1499	12.017
-0.061	-0.0035			31.24	0.5677	23.588								0.1697	12.679
0.042	0			31.24	0.5829	25.2965								0.1828	13.459
0.033	0			31.24	0.598	27.0692								0.199	14.4
-0.474	-0.0071			31.24	0.6141	28.9238								0.215	15.007
-1.768	-0.0227			31.24	0.6339	31.3041								0.2311	15.848
-2.974	-0.0385			31.24	0.6463	32.7696								0.2439	16.533
-4.13	-0.055			31.24	0.6579	34.2714								0.2579	17.653
-5.416	-0.07			31.24	0.6779	36.8472								0.275	18.445
-6.473	-0.0808			31.24	0.6929	38.9771								0.2945	19.875
-7.893	-0.0966			31.24	0.7082	41.1727								0.3102	20.773
-9.551	-0.1166			31.24	0.7244	43.4501								0.33	22.271
-10.812	-0.1334			31.24	0.7403	45.776								0.3461	23.301
-12.017	-0.1499			31.24	0.7561	48.1652								0.3575	24.225
-12.679	-0.1697			31.24	0.7718	50.6126								0.3747	25.415
-13.459	-0.1828			31.24	0.7879	53.1134								0.3854	26.296
-14.4	-0.199			31.24	0.8029	55.6799								0.4012	27.623
-15.007	-0.215			31.24	0.8148	57.6359								0.4173	28.872
-15.848	-0.2311			31.24	0.8304	60.2695								0.4337	30.251
-16.533	-0.2439			31.24	0.8499	63.6264								0.4497	31.881
-17.653	-0.2579			31.24	0.8662	66.3644								0.4693	33.851
-18.445	-0.275			31.24	0.882	69.1749								0.4803	35.118
-19.875	-0.2945			31.24	0.8975	72.0177								0.4928	36.426
-20.773	-0.3102			31.24	0.9128	74.8463								0.5132	38.575
-22.271	-0.33			31.24	0.9229	76.7832								0.5285	40.432
-23.301	-0.3461			31.24	0.9377	79.3874								0.5439	42.527
-24.225	-0.3575			31.24	0.9515	82.0946								0.5593	44.954
-25.415	-0.3747			31.24	0.9722	86.2525								0.5748	48.141
-26.296	-0.3854			31.24	0.9903	89.7269								0.59	51.628
-27.623	-0.4012			31.24	1.0072	92.7584								0.6051	55.246
-28.872	-0.4173			31.24	1.0228	95.6743								0.6212	59.031
-30.251	-0.4337			31.24	1.0379	98.5666								0.641	63.889
-31.881	-0.4497			31.24	1.0529	101.454								0.6534	66.88
-33.851	-0.4693			31.24	1.0679	104.361								0.665	69.945
-35.118	-0.4803			31.24	1.0805	106.646								0.685	75.202
-36.426	-0.4928			31.24	1.0979	109.927								0.7	79.549
-38.575	-0.5132			31.24	1.116	113.379								0.7153	84.03
-40.432	-0.5285			31.24	1.1332	116.636								0.7315	88.678
-42.527	-0.5439			31.24	1.1544	120.456								0.7474	93.425
-44.954	-0.5593			31.24	1.1708	123.357								0.7632	98.301
-48.141	-0.5748			31.24	1.1876	126.144								0.7789	103.296
-51.628	-0.59			31.24	1.2029	128.813								0.795	108.4
-55.246	-0.6051			31.24	1.2193	131.222								0.81	113.638
-59.031	-0.6212			31.24	1.2361	132.723								0.8219	117.63
-63.889	-0.641			31.24	1.2579	126.595								0.8375	123.005
-66.88	-0.6534			31.24	1.2674	127.783								0.857	129.856
-69.945	-0.665			31.24	1.2829	130.308								0.8733	135.444
-75.202	-0.685			31.24	1.2929	132.562								0.8891	141.18
-79.549	-0.7			31.24	1.3103	135.482								0.9046	146.982
-84.03	-0.7153			31.24	1.3299	139.314								0.9199	152.755
-88.678	-0.7315			31.24	1.3489	142.944								0.93	156.708
-93.425	-0.7474			31.24	1.3678	145.8								0.9448	162.023
-98.301	-0.7632			31.24	1.3824	148.743								0.9586	167.548
-103.296	-0.7789			31.24	1.3954	150.77								0.9793	176.034
-108.4	-0.795			31.24	1.4104	153.403								0.9974	183.125
-113.638	-0.81			31.24	1.4279	155.867								1.0143	189.312
-117.63	-0.8219			31.24	1.4386	157.873								1.0299	195.263
-123.005	-0.8375			31.24	1.4553	160.417								1.045	201.166
-129.856	-0.857			31.24	1.471	163.023								1.06	207.058
-135.444	-0.8733			31.24	1.4877	165.471								1.075	212.992
-141.18	-0.8891			31.24	1.5031	167.992								1.0876	217.656
-146.982	-0.9046			31.24	1.5148	169.794								1.105	224.351
-152.755	-0.9199			31.24	1.5312	172.248								1.1231	231.397
-156.708	-0.93			31.24	1.5472	174.66								1.1403	238.044
-162.023	-0.9448			31.24	1.559	176.409								1.1615	245.841
-167.548	-0.9586			31.24	1.5746	178.709								1.1779	251.762
-176.034	-0.9793			31.24	1.5953	181.546								1.1947	257.45
-183.125	-0.9974			31.24	1.6076	183.176								1.21	262.897
-189.312	-1.0143			31.24	1.6194	184.773								1.2264	267.812
-195.263	-1.0299			31.24	1.6389	187.272								1.2432	270.877
-201.166	-1.045			31.24	1.6511	188.749								1.265	258.369
-207.058	-1.06			31.24	1.6629	190.234								1.2745	260.795
-212.992	-1.075			31.24	1.6829	192.597								1.29	265.948
-217.656	-1.0876			31.24	1.6984	194.287								1.3	270.548
-224.351	-1.105			31.24	1.7105	195.377								1.3174	276.507
-231.397	-1.1231			31.24	1.727	196.066								1.337	284.328
-238.044	-1.1403			31.24	1.7429	196.822								1.356	291.737
-245.841	-1.1615			31.24	1.7542	197.093								1.3749	297.566
-251.762	-1.1779			31.24	1.7745	196.334								1.3895	303.571
-257.45	-1.1947			31.24	1.7911	194.616								1.4025	307.708
-262.897	-1.21			31.24	1.8115	183.036								1.4175	313.082
-267.812	-1.2264			31.24	2.7285	33.4771								1.435	318.112
-270.877	-1.2432			31.24										1.4457	322.206
-258.369	-1.265													1.4624	327.398
-260.795	-1.2745													1.4781	332.717
-265.948	-1.29													1.4948	337.712
-270.548	-1.3													1.5102	342.858
-276.507	-1.3174													1.5219	346.536
-284.328	-1.337													1.5383	351.544
-291.737	-1.356													1.5543	356.467
-297.566	-1.3749													1.5661	360.035
-303.571	-1.3895													1.5817	364.73
-307.708	-1.4025													1.6024	370.52
-313.082	-1.4175													1.6147	373.847
-318.112	-1.435													1.6265	377.106
-322.206	-1.4457													1.646	382.206
-327.398	-1.4624													1.6582	385.22
-332.717	-1.4781													1.67	388.251
-337.712	-1.4948													1.69	393.075
-342.858	-1.5102													1.7055	396.523
-346.536	-1.5219													1.7176	398.747
-351.544	-1.5383													1.7341	400.154
-356.467	-1.5543													1.75	401.696
-360.035	-1.5661													1.7613	402.251
-364.73	-1.5817													1.7816	400.701
-370.52	-1.6024													1.7982	397.195
-373.847	-1.6147													1.8186	373.56
-377.106	-1.6265													2.7356	68.324
-382.206	-1.646													2.1231	-5.496
-385.22	-1.6582													1.9044	-5.615
-388.251	-1.67													1.8796	-5.558
-393.075	-1.69													1.9197	-5.556
-396.523	-1.7055													1.909	-5.493
-398.747	-1.7176													1.9426	-5.494
-400.154	-1.7341													1.945	-5.549
-401.696	-1.75													1.9719	-5.54
-402.251	-1.7613													1.979	-5.533
-400.701	-1.7816													1.9988	-5.545
-397.195	-1.7982													2.01	-5.541
-373.56	-1.8186													2.0315	-5.535
-68.324	-2.7356													2.0411	-5.552
5.496	-2.1231													2.0687	-5.523
5.615	-1.9044													2.079	-5.532
5.558	-1.8796													2.0893	-5.523
5.556	-1.9197													2.1039	-5.555
5.493	-1.909													2.1199	-5.532
5.494	-1.9426													2.1356	-5.531
5.549	-1.945													2.1521	-5.525
5.54	-1.9719													2.1684	-5.524
5.533	-1.979													2.1849	-5.523
5.545	-1.9988													2.2002	-5.531
5.541	-2.01													2.2162	-5.528
5.535	-2.0315													2.2365	-5.531
5.552	-2.0411													2.2541	-5.528
5.523	-2.0687													2.27	-5.529
5.532	-2.079													2.2868	-5.529
5.523	-2.0893													2.3	-5.535
5.555	-2.1039													2.3147	-5.52
5.532	-2.1199													2.33	-5.529
5.531	-2.1356													2.3454	-5.525
5.525	-2.1521													2.3624	-5.528
5.524	-2.1684													2.3778	-5.521
5.523	-2.1849													2.395	-5.523
5.531	-2.2002													2.41	-5.522
5.528	-2.2162													2.4244	-5.533
5.531	-2.2365													2.4381	-5.525
5.528	-2.2541													2.455	-5.526
5.529	-2.27													2.466	-5.525
5.529	-2.2868													2.4838	-5.529
5.535	-2.3													2.4977	-5.523
5.52	-2.3147													2.5109	-5.522
5.529	-2.33													2.5254	-5.523
5.525	-2.3454													2.5472	-5.523
5.528	-2.3624													2.5576	-5.522
5.521	-2.3778													2.5704	-5.519
5.523	-2.395													2.59	-5.52
5.522	-2.41													2.607	-5.521
5.533	-2.4244													2.6218	-5.518
5.525	-2.4381													2.639	-5.516
5.526	-2.455													2.6546	-5.514
5.525	-2.466													2.6707	-5.518
5.529	-2.4838													2.6859	-5.516
5.523	-2.4977													2.703	-5.521
5.522	-2.5109													2.7223	-5.518
5.523	-2.5254													2.735	-5.518
5.523	-2.5472													2.755	-5.517
5.522	-2.5576													2.77	-5.519
5.519	-2.5704													2.7864	-5.512
5.52	-2.59													2.8025	-5.512
5.521	-2.607													2.8185	-5.512
5.518	-2.6218													2.835	-5.509
5.516	-2.639													2.8463	-5.511
5.514	-2.6546													2.86	-5.511
5.518	-2.6707													2.864	-5.51
5.516	-2.6859													2.86	-5.515
5.521	-2.703													2.8611	-5.516
5.518	-2.7223													2.861	-5.519
5.518	-2.735
5.517	-2.755
5.519	-2.77
5.512	-2.7864
5.512	-2.8025
5.512	-2.8185
5.509	-2.835
5.511	-2.8463
5.511	-2.86
5.51	-2.864
5.515	-2.86
5.516	-2.8611
5.519	-2.861
